# Supplementary material for: Regioselective cycloaddition of potassium alkynyltrifluoroborates with 3-azetidinones and 3-oxetanone by nickel-catalysed C–C bond activation
Source: Royal Society of Chemistry journal article supplement (doi:10.1039/c8cc09241a), 2018-12-10

## SUPPORTING INFORMATION

Fathi Elwrfalli, Yannick J. Esvan, Craig M. Robertson and Christophe Aïssa  
e-mail: *aissa@liverpool.ac.uk*

**General.** Otherwise noted, all reactions were carried out in flame-dried glassware under dry nitrogen atmosphere. The solvents were purified with the solvent purification system Pure Solv MD-6 (THF, Et<sub>2</sub>O, CH<sub>2</sub>Cl<sub>2</sub>); toluene and dioxane were purchased from Acros (>99%, Extra Dry over Molecular Sieve, AcroSeal™). Oxetanone **3** was purchased from Fluorochem. Compound **12** was purchased from Aldrich. Compounds **1**,<sup>1</sup> **2**,<sup>1</sup> **4**,<sup>2</sup> **5**,<sup>3</sup> **6**,<sup>4</sup> **7**,<sup>2</sup> **8**,<sup>2</sup> **9**,<sup>3</sup> **10**,<sup>5</sup> **11**<sup>6</sup> and **13**<sup>3</sup> were prepared according to the literature.<sup>1,2</sup> Flash chromatography: Merck silica gel 60 (230-400 mesh). NMR: Spectra were recorded on a Bruker DRX 500 in the indicated solvent; chemical shifts ( $\delta$ ) are given in ppm. The solvent signals were used as references and the chemical shifts converted to the TMS scale (MeCN-d<sub>3</sub>:  $\delta$ C = 118.2 ppm;  $\delta$ H = 1.96 ppm / DMSO-d<sub>6</sub>:  $\delta$ C = 39.5 ppm;  $\delta$ H = 2.50 ppm); apparent splitting patterns are designated using the following abbreviations: s (singlet), d (doublet), t (triplet), q (quartet), quint. (quintuplet), sept. (septuplet), m (multiplet), br (broad), and the appropriate combinations. In <sup>19</sup>F NMR, 1,3,5-trifluorobenzene was used as internal standard ( $\delta$ F = -110.6 ppm). Note that the rapid quadrupolar relaxation of <sup>11</sup>B prevented the observation of the quaternary carbon atom that bears the boron atom in <sup>13</sup>C NMR spectra. IR: PerkinElmer Spectrum 100 FT-IR spectrometer, wavenumbers in cm<sup>-1</sup>. HRMS determined at the University of Liverpool on micromass LCT mass spectrometer (ES) and Trio-1000 or Agilent QTOF 7200 mass spectrometers (CI). Melting points: Griffin melting point apparatus (not corrected). All commercially available compounds were used as received.

|                                                     |     |
|-----------------------------------------------------|-----|
| <b>Synthesis of compounds 14–26</b>                 | S2  |
| <b>Synthesis of compound 27</b>                     | S5  |
| <b>References</b>                                   | S6  |
| <b>Copies of 1D NMR spectra for compounds 14–26</b> | S7  |
| <b>Copies of 2D NMR spectra for compounds 14–26</b> | S58 |

## Synthesis of compounds 14–26

**Compound 14.** Inside an argon-filled glovebox, a J-Young flame-dried Schlenk flask equipped with a small stirrer bar was charged with Ni(cod)<sub>2</sub> (48 mg, 0.18 mmol, 0.1 equiv) and PPh<sub>3</sub> (142 mg, 0.54 mmol, 0.3 equiv). Then, outside the glovebox and under N<sub>2</sub>, dioxane (1.5 mL) was added. The mixture was stirred at room temperature for 10 minutes, then **1** (431 mg, 2.52 mmol, 1.4 equiv), potassium trifluoro(hex-1-yn-1-yl)borate **4** (339 mg, 1.80 mmol, 1 equiv) and dioxane (4.5 mL) were added in that order. The tube was sealed and the mixture was stirred at 60 °C for 18 h. At room temperature, MeCN (30 mL) was added and all volatiles were removed *in vacuo*. The resulting brown residue was dissolved in acetone (15 mL) and Et<sub>2</sub>O (60 mL) was added to induce precipitation. The resulting solid was filtrated through a sintered funnel followed by trituration with Et<sub>2</sub>O (3 x 15 mL) at room temperature to afford **14** as a white solid (457 mg, 70%); m.p.: 155–157 °C; <sup>1</sup>H NMR (500 MHz, MeCN-d<sub>3</sub>): δ 4.02 (s, 2H), 3.83 (s, 2H), 2.49–2.41 (m, 2H), 1.56–1.47 (m, 2H), 1.48 (s, 9H), 1.45–1.33 (m, 2H), 0.953 (t, *J* = 7.4 Hz); <sup>13</sup>C NMR (126 MHz, MeCN-d<sub>3</sub>): δ 201.7 (br), 165.5, 155.2, 80.7, 52.4 (br), 47.9 (br), 34.6, 32.4, 28.7 (3C), 23.8, 14.4; <sup>19</sup>F NMR (376 MHz, MeCN-d<sub>3</sub>): δ = -136.7 – -137.5 (m); <sup>11</sup>B NMR (160 MHz, MeCN-d<sub>3</sub>): δ = 2.29 (q, *J* = 50.5 Hz); IR (neat):  $\tilde{\nu}$  = 2960, 2969, 2871, 1675, 1665, 1609, 1479, 1418, 1377, 1366, 1315, 1293, 1245, 1160, 1140, 1098, 1065, 1015, 984, 958, 898 cm<sup>-1</sup>; HRMS (ES<sup>-</sup>): calcd for [M – K]<sup>-</sup>: 320.1645; found: 320.1655

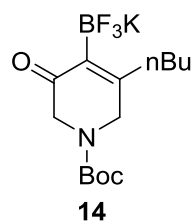

**Compound 15.** This compound was obtained from **1** (431 mg, 2.52 mmol) and potassium (cyclohexylethynyl)trifluoroborate **5** (385 mg, 1.80 mmol) by the procedure described for the preparation of **14**. White solid, 430 mg, 62%; m.p.: 145–147 °C; <sup>1</sup>H NMR (500 MHz, MeCN-d<sub>3</sub>): δ 4.00 (s, 2H), 3.81 (s, 2H), 3.21–3.10 (m, 1H), 1.80–1.72 (m, 2H), 1.72–1.65 (m, 1H), 1.65–1.58 (m, 2H), 1.43 (s, 9H), 1.40–1.15 (m, 5H); <sup>13</sup>C NMR (126 MHz, MeCN-d<sub>3</sub>): δ 202.8 (br), 169.4, 155.2, 80.7, 53.0 (br), 44.1 (br), 43.6, 31.7, 28.7 (3C), 27.3, 27.0; <sup>19</sup>F NMR (376 MHz, MeCN-d<sub>3</sub>): δ = -136.3 – -137.0 (m); <sup>11</sup>B NMR (160 MHz, MeCN-d<sub>3</sub>): δ = 2.23 (q, *J* = 53.3 Hz); IR (neat):  $\tilde{\nu}$  = 2978, 2928, 2850, 1686, 1656, 1594, 1424, 1391, 1376, 1367, 1303, 1285, 1250, 1162, 1141, 1120, 1078, 1013, 986, 962, 934, 898 cm<sup>-1</sup>; HRMS (ES<sup>-</sup>): calcd for [M – K]<sup>-</sup>: 345.1843; found: 345.1844.

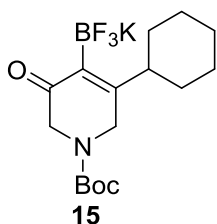

**Compound 16.** This compound was obtained from **1** (288 mg, 1.68 mmol) and potassium (cyclopropylethynyl)trifluoroborate **6** (206 mg, 1.20 mmol) by the procedure described for the preparation of **14**, except that the precipitation was induced by a mixture of acetone and petroleum ether. White solid, 206 mg, 56%; m.p. > 105 °C (decomposition); <sup>1</sup>H NMR (500 MHz, DMSO-d<sub>6</sub>): δ 3.70 (s, 2H), 3.46 (s, 2H), 2.62–2.50 (m, 1H), 1.39 (s, 9H), 0.79–0.64 (m, 4H); <sup>13</sup>C NMR (126 MHz, DMSO-d<sub>6</sub>): δ 197.3 (br), 161.3 (br), 153.2, 79.2, 52.00 (br), 28.0 (3C), 14.4, 5.8 (the signal of one methylene of the heterocycle is overlapped with the NMR solvent); <sup>19</sup>F NMR (376 MHz, DMSO-d<sub>6</sub>): δ = -133.6 – -134.4 (m); <sup>11</sup>B NMR (160 MHz, MeCN-d<sub>3</sub>): δ = 2.49 (q, *J* = 52.2 Hz); IR (neat):  $\tilde{\nu}$  = 2974, 1691, 1641, 1612, 1582, 1418, 1378, 1365, 1310, 1249, 1168, 1127, 1083, 1028, 1003, 974, 900 cm<sup>-1</sup>; HRMS (ES<sup>-</sup>): calcd for [M – K]<sup>-</sup>: 303.1374; found: 303.1378.

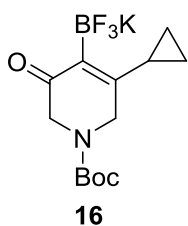

**Compound 17.** This compound was obtained from **1** (288 mg, 1.68 mmol) and potassium (3-methylbut-3-en-1-yn-1-yl)trifluoroborate **7** (206 mg, 1.20 mmol) by the procedure described for the preparation of **14**. White solid, 365 mg, 89%; m.p.: 168–170 °C; <sup>1</sup>H NMR (500 MHz, DMSO-d<sub>6</sub>): δ 4.83 (s, 1H), 4.66 (s, 1H), 3.94 (s, 2H), 3.77 (s, 2H), 1.89 (s, 3H), 1.41 (s, 9H); <sup>13</sup>C NMR (126 MHz, DMSO-d<sub>6</sub>): δ 198.8 (br), 160.5, 153.4, 145.7, 139.2 (br), 111.3, 79.3, 51.2 (br), {46.9 (br) & 46.2 (br), two signals for one of the methylene of the heterocycle are visible, corresponding to two rotamers}, 27.9 (3C), 22.5; <sup>19</sup>F NMR (376 MHz, MeCN-d<sub>3</sub>): δ = -136.2 – -136.9 (m); <sup>11</sup>B NMR (160 MHz, MeCN-d<sub>3</sub>): δ = 1.89 (q, *J* = 51.6 Hz); IR (neat):  $\tilde{\nu}$  = 2976,

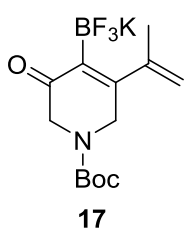

2911, 2819, 1702, 1658, 1604, 1476, 1431, 1415, 1366, 1311, 1265, 1239, 1161, 1139, 1087, 1022, 1006, 982, 950  $\text{cm}^{-1}$ ; HRMS (ES<sup>-</sup>): calcd for  $[\text{M} - \text{K}]^-$ : 303.1374; found: 303.1385.

**Compound 18.** This compound was obtained from **1** (288 mg, 1.68 mmol) and potassium (phenylethynyl)trifluoroborate **8** (250 mg, 1.20 mmol) by the procedure described for the preparation of **14**. White solid, 359 mg, 79%; m.p.: 150–153 °C; <sup>1</sup>H NMR (500 MHz, MeCN-d<sub>3</sub>):  $\delta$  7.45–7.26 (m, 5H), 4.35–4.16 (s (br), 2H), 4.06–3.89 (s (br), 2H), 1.51 (s, 9H); <sup>13</sup>C NMR (126 MHz, MeCN-d<sub>3</sub>):  $\delta$  202.3 (br), 161.5 (br), 155.3, 142.3, 129.1 (2C), 128.6, 128.4 (2C), 81.0, 52.5 (br), 49.6 (br), 28.6 (3C); <sup>19</sup>F NMR (376 MHz, DMSO-d<sub>6</sub>):  $\delta$  = -133.9 – -134.8 (m); <sup>11</sup>B NMR (160 MHz, MeCN-d<sub>3</sub>):  $\delta$  = 3.09–0.90 (m); IR (neat):  $\tilde{\nu}$  = 2976, 1694, 1656, 1585, 1441, 122, 1394, 1359, 1305, 1276, 1241, 1160, 1128, 1081, 1031, 978, 959, 929, 906, 858  $\text{cm}^{-1}$ ; HRMS (ES<sup>-</sup>): calcd for  $[\text{M} - \text{K}]^-$ : 339.1374; found: 339.1374.

**Compound 19.** This compound was obtained from **1** (288 mg, 1.68 mmol) and potassium ((4-methoxyphenyl)ethynyl)trifluoroborate **9** (286 mg, 1.20 mmol) by the procedure described for the preparation of **14**, except that the precipitation was induced by a mixture of acetone and petroleum ether. White solid, 395 mg, 80%; m.p.: 151–153 °C; <sup>1</sup>H NMR (500 MHz, MeCN-d<sub>3</sub>):  $\delta$  7.36 (d,  $J$  = 8.8 Hz, 2H), 6.92 (d,  $J$  = 8.3 Hz, 2H), 4.24 (s, 2H), 3.96 (s, 2H), 3.83 (s, 3H), 1.50 (s, 9H); <sup>13</sup>C NMR (126 MHz, MeCN-d<sub>3</sub>):  $\delta$  202.6 (br), 161.5 (br), 160.9, 155.4, 134.3, 130.9 (2C), 113.9 (2C), 81.0, 56.0, 52.8 (br), 49.6 (br), 28.7 (3C); <sup>19</sup>F NMR (376 MHz, MeCN-d<sub>3</sub>):  $\delta$  = -135.5 – -136.4 (m); <sup>11</sup>B NMR (160 MHz, MeCN-d<sub>3</sub>):  $\delta$  = 3.09–0.90 (m); IR (neat):  $\tilde{\nu}$  = 2977, 2836, 1694, 1643, 1606, 1509, 1434, 1415, 1363, 1305, 1285, 1243, 1162, 1130, 1087, 1030, 968, 907, 890  $\text{cm}^{-1}$ ; HRMS (ES<sup>-</sup>): calcd for  $[\text{M} - \text{K}]^-$ : 369.1479; found: 369.1489.

**Compound 20.** This compound was obtained from **1** (144 mg, 0.84 mmol) and potassium (((4-trifluoromethyl)phenyl)ethynyl)trifluoroborate **10** (166 mg, 0.60 mmol) by the procedure described for the preparation of **14**. White solid, 141 mg, 57%; m.p.: 152–155 °C; <sup>1</sup>H NMR (500 MHz, MeCN-d<sub>3</sub>):  $\delta$  7.67 (d,  $J$  = 8.1 Hz, 2H), 7.52 (d,  $J$  = 8.2 Hz, 2H), 4.23 (s, 2H), 4.00 (s, 2H), 1.49 (s, 9H); <sup>13</sup>C NMR (126 MHz, MeCN-d<sub>3</sub>):  $\delta$  201.8 (br), 159.5 (br), 155.3, 146.7, 129.9 (2C), 129.8 (q,  $J$  = 32.1 Hz), 125.7 (q,  $J$  = 271.1 Hz), 125.3 (q,  $J$  = 4.1 Hz, 2C), 81.1, 52.7 (br), 49.6 (br), 28.7 (3C); <sup>19</sup>F NMR (376 MHz, MeCN-d<sub>3</sub>):  $\delta$  = -64.2, -135.5 – -136.3 (m); <sup>11</sup>B NMR (160 MHz, MeCN-d<sub>3</sub>):  $\delta$  = 1.68 (q,  $J$  = 46.8 Hz); IR (neat):  $\tilde{\nu}$  = 1701, 1665, 1604, 1419, 1368, 1325, 1303, 1247, 1223, 1180, 1135, 1114, 1105, 1066, 1015, 968  $\text{cm}^{-1}$ ; HRMS (ES<sup>-</sup>): calcd for  $[\text{M} - \text{K}]^-$ : 408.1211; found: 408.1196.

**Compound 21.** This compound was obtained from **1** (144 mg, 0.84 mmol) and potassium (thiophen-3-yl)ethynyl)trifluoroborate **11** (128 mg, 0.60 mmol) by the procedure described for the preparation of **14**. White solid, 183 mg, 79%; m.p.: 162–164 °C; <sup>1</sup>H NMR (500 MHz, MeCN-d<sub>3</sub>):  $\delta$  7.58–7.49 (s (br), 1H), 7.33 (dd,  $J$  = 5.0, 3.0 Hz, 1H), 7.30 (d,  $J$  = 4.7 Hz, 1H), 4.29 (s, 2H), 3.96 (s, 2H), 1.50 (s, 9H); <sup>13</sup>C NMR (126 MHz, MeCN-d<sub>3</sub>):  $\delta$  202.5 (br), 155.4, 155.3 (br), 142.2, 130.4, 125, 7, 124.9, 81.0, 52.7 (br), 49.9 (br), 28.6 (3C); <sup>11</sup>B NMR (160 MHz, MeCN-d<sub>3</sub>):  $\delta$  = 3.13–1.09 (m); IR (neat):  $\tilde{\nu}$  = 2985, 1686, 1644, 1596, 1424, 1366, 1299, 1248, 1159, 1125, 1076, 999, 975, 91, 896, 852, 841  $\text{cm}^{-1}$ ; HRMS (ES<sup>-</sup>): calcd for  $[\text{M} - \text{K}]^-$ : 345.0938; found: 345.0941.

**Compound 22.** Inside an argon-filled glovebox, a Teflon-screw flame-dried Schlenk flask equipped with a small stirrer bar was charged with Ni(cod)<sub>2</sub> (16 mg, 0.06 mmol, 0.1 equiv) and PPh<sub>3</sub> (48 mg, 0.18 mmol, 0.3 equiv). Then, outside the glovebox and under N<sub>2</sub>, dioxane (0.5 mL) was added. The mixture was stirred at room temperature for 10 minutes, then a solution of **2** (182 mg, 0.84 mmol, 1.4 equiv) in dioxane (0.5 mL) was added, followed by **9** (143 mg, 0.60 mmol, 1 equiv) and finally dioxane (1 mL). The tube was sealed and the mixture was stirred at 60 °C for 18 h. At room temperature, MeCN (15 mL) was added and all volatiles were removed *in vacuo*. The resulting brown residue was dissolved in acetone (5 mL) and Et<sub>2</sub>O (30 mL) was added to induce precipitation. The resulting solid was filtrated through a sintered funnel followed by trituration with Et<sub>2</sub>O (2 x 15 mL) at room temperature to afford **22** as a cream-coloured solid (275 mg, 98%); m.p. > 155 °C (decomposition); <sup>1</sup>H NMR (500 MHz, DMSO-d<sub>6</sub>): δ 7.67 (d, *J* = 8.6 Hz, 2H), 7.42 (d, *J* = 8.6 Hz, 2H), 7.22 (d, *J* = 8.6 Hz, 2H), 6.84 (d, *J* = 8.6 Hz, 2H), 3.76 (s, 3H), 3.76 (s, 2H), 3.43 (s, 2H), 2.38 (s, 3H); <sup>13</sup>C NMR (126 MHz, DMSO-d<sub>6</sub>): δ 196.1, 159.0, 155.8, 143.8, 132.7, 132.1, 130.0 (2C), 129.6 (2C), 127.6 (2C), 112.6 (2C), 55.0, 52.5, 49.4, 21.0; <sup>19</sup>F NMR (376 MHz, MeCN-d<sub>3</sub>): δ = -135.8 – -136.6 (m); <sup>11</sup>B NMR (160 MHz, DMSO-d<sub>6</sub>): δ = 4.06 – -0.39 (m); IR (neat):  $\tilde{\nu}$  = 1651, 1604, 1509, 1440, 1348, 1306, 1289, 1249, 1162, 1120, 1091, 1028, 962 cm<sup>-1</sup>; HRMS (ES<sup>+</sup>): calcd for [M + K]<sup>+</sup>: 502.0276; found: 502.0266.

**Compound 23.** Inside an argon-filled glovebox, a Teflon-screw flame-dried Schlenk flask equipped with a small stirrer bar was charged with Ni(cod)<sub>2</sub> (16 mg, 0.06 mmol, 0.1 equiv) and PPh<sub>3</sub> (48 mg, 0.18 mmol, 0.3 equiv). Then, outside the glovebox and under N<sub>2</sub>, dioxane (0.5 mL) was added. The mixture was stirred at room temperature for 10 minutes, then **3** (54 μL, 0.84 mmol, 1.4 equiv), **9** (143 mg, 0.60 mmol, 1 equiv) and dioxane (1.5 mL) were added in that order. The tube was sealed and the mixture was stirred at 90 °C for 18 h. At room temperature, MeCN (15 mL) was added and all volatiles were removed *in vacuo*. The resulting brown residue was dissolved in acetone (5 mL) and Et<sub>2</sub>O (30 mL) was added to induce precipitation. The resulting solid was filtrated through a sintered funnel followed by trituration with Et<sub>2</sub>O (2 x 10 mL) at room temperature to afford **23** as a cream-coloured solid (93 mg, 55%); m.p. > 145 °C (decomposition); <sup>1</sup>H NMR (500 MHz, DMSO-d<sub>6</sub>): δ 7.33 (d, *J* = 8.4 Hz, 2H), 6.83 (d, *J* = 8.4 Hz, 2H), 4.30 (s, 2H), 3.87 (s, 2H), 3.76 (s, 3H); <sup>13</sup>C NMR (126 MHz, DMSO-d<sub>6</sub>): δ 199.4, 158.9, 158.6, 131.6, 129.7 (2C), 112.4 (2C), 71.5, 68.7, 54.9; <sup>19</sup>F NMR (376 MHz, MeCN-d<sub>3</sub>): δ = -135.6 – -136.4 (m); <sup>11</sup>B NMR (160 MHz, MeCN-d<sub>3</sub>): δ = 1.97 (q, *J* = 51.1 Hz); IR (neat):  $\tilde{\nu}$  = 1642, 1602, 1589, 1564, 1506, 1470, 1435, 1416, 1387, 1313, 1287, 1249, 1223, 1178, 1134, 1118, 1104, 1050, 955, 944, 927, 888, 870, 826, 814 cm<sup>-1</sup>; HRMS (ES<sup>-</sup>): calcd for [M - K]<sup>-</sup>: 271.0753; found: 271.0754.

**Compound 24.** This compound was obtained from **2** (### mg, 0.84 mmol) and potassium ((4-methoxyphenyl)ethynyl)trifluoroborate **9** (103 mg, 0.60 mmol) by the procedure described for the preparation of **22**. Pale brown solid, 216 mg, 92%; m.p.: 112–115 °C; <sup>1</sup>H NMR (500 MHz, DMSO-d<sub>6</sub>): δ 7.66 (d, *J* = 8.1 Hz, 2H), 7.44 (d, *J* = 8.1 Hz, 2H), 4.80 (s, 1H), 4.59 (s, 1H), 3.56 (s, 2H), 3.37 (s, 2H), 2.39 (s, 3H), 1.83 (s, 3H); <sup>13</sup>C NMR (126 MHz, DMSO-d<sub>6</sub>): δ 195.7, 158.2, 145.6, 143.8, 132.1, 129.9 (2C), 111.7 (2C), 52.2, 48.1, 22.6, 20.1; <sup>19</sup>F NMR (376 MHz, MeCN-d<sub>3</sub>): δ = -137.6 – -138.4 (m); <sup>11</sup>B NMR (160 MHz, MeCN-d<sub>3</sub>): δ = 3.87 – -0.57 (m); IR (neat):  $\tilde{\nu}$  = 2981, 2889, 1653, 1596, 1462, 1382, 1349, 1263, 1160, 1088, 955 cm<sup>-1</sup>; HRMS (ES<sup>+</sup>): calcd for [M + K]<sup>+</sup>: 436.0170; found: 436.0171.

**Compound 25.** This compound was obtained from **2** (113 mg, 0.50 mmol) and propyn-1-yl-trifluoroborate **12** (70 mg, 0.36 mmol) by the procedure described for the preparation of **22**. Pale brown solid, 94 mg, 70%;  $^1\text{H}$  NMR (500 MHz, MeCN- $\text{d}_3$ ):  $\delta$  7.67 (d,  $J$  = 8.5 Hz, 2H), 7.41 (d,  $J$  = 8.0 Hz, 2H), 3.62 (s, 2H), 3.44 (s, 2H), 2.42 (s, 3H), 2.00 (s, 3H);  $^{13}\text{C}$  NMR (126 MHz, DMSO- $\text{d}_6$ ):  $\delta$  194.6, 155.5, 143.5, 131.9, 129.6 (2C), 127.3 (2C), 51.9, 49.1, 20.7, 19.9;  $^{19}\text{F}$  NMR (376 MHz, MeCN- $\text{d}_3$ ):  $\delta$  = -136.5 – -137.4 (m);  $^{11}\text{B}$  NMR (160 MHz, MeCN- $\text{d}_3$ ):  $\delta$  = 2.92 – 1.22 (m); IR (neat):  $\tilde{\nu}$  = 1658, 1603, 1437, 1342, 1303, 1187, 1161, 1141, 1122, 1096, 1035, 962, 919, 896, 835, 813  $\text{cm}^{-1}$ ; HRMS (ES $^+$ ): calcd for  $[\text{M} + \text{K}]^+$ : 410.0014; found: 410.0017.

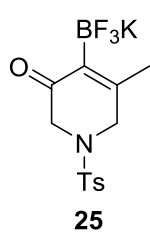**25**

**Compound 26.** This compound was obtained from **3** (35  $\mu\text{L}$ , 0.50 mmol) and potassium ((2-naphthyl)ethynyl)trifluoroborate **13** (93 mg, 0.36 mmol) by the procedure described for the preparation of **22**. Pale yellow solid, 83 mg, 70%;  $^1\text{H}$  NMR (500 MHz, DMSO- $\text{d}_6$ ):  $\delta$  7.92–7.84 (m, 3H), 7.83–7.76 (m, 1H), 7.55–7.44 (m, 3H), 4.44 (s, 2H), 3.97 (s, 2H);  $^{13}\text{C}$  NMR (126 MHz, DMSO- $\text{d}_6$ ):  $\delta$  199.3, 158.9, 137.4, 132.4, 132.3, 127.9, 127.4, 127.1, 126.4, 126.0, 125.7, 125.6, 71.4, 68.9;  $^{19}\text{F}$  NMR (376 MHz, MeCN- $\text{d}_3$ ):  $\delta$  = -135.8 – -136.6 (m);  $^{11}\text{B}$  NMR (160 MHz, MeCN- $\text{d}_3$ ):  $\delta$  = 1.92 (q,  $J$  = 48.5 Hz); IR (neat):  $\tilde{\nu}$  = 1647, 1634, 1603, 1585, 1428, 1377, 1310, 1258, 1126, 1107, 107, 997, 943  $\text{cm}^{-1}$ ; HRMS (ES $^-$ ): calcd for  $[\text{M} - \text{K}]^-$ : 291.0804; found: 291.0797.

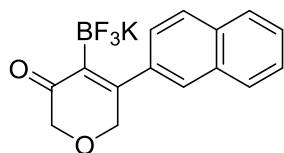**26**

### Synthesis of compound 27

**Compound 27.** To a solution of **14** (245 mg, 0.68 mmol, 1 equiv) in THF/Water 1:1 (6 mL) was added tetrabutylammonium tribromide (329 mg, 0.68 mmol, 1 equiv). The mixture was stirred at r.t for 1 h until the disappearance of the orange colour. The mixture was quenched with water, and the aqueous layer was extracted with Et $_2$ O. The combined organic layers were dried over MgSO $_4$ , filtered and concentrated under *vacuo*. The residue was purified by flash chromatography (Hexane/EtOAc 4:1) to give a colourless oil (192 mg, 85%). This material was not entirely pure but used in the next step without further purification. Thus, a small amount of this material (42 mg, 0.126 mmol, 1 equiv) was placed in a J-Young schlenck tube, and the tube was evacuated. Under N $_2$ , 4-Methoxyphenylboronic acid (58 mg, 0.379 mmol, 3 equiv), K $_3$ PO $_4$  (81 mg, 0.379 mmol, 3 equiv) and toluene (0.5 mL) were added, and this mixture was degassed by gently bubbling argon through the solution for 1 minute. Then, SPhos (8 mg, 0.020 mmol, 0.016 equiv) and Pd $_2$ (dba) $_3$  (9 mg, 0.010 mmol, 0.08 equiv) were added and the schlenck was sealed. After heating at 80 C for 3 h, the mixture was diluted with EtOAc and washed with water. The organic layer was dried over MgSO $_4$ , filtered and concentrated under *vacuo*. The residue was purified by flash chromatography (Hexane to Hexane/EtOAc (95/5)) to give 27 as colourless oil (37 mg, 81%). The spectroscopic data for this compound was identical to that described in the literature.<sup>1a</sup>

## References

1. a) K. Y. T. Ho, C. Aïssa, *Chem. Eur. J.* **2012**, *18*, 3486; b) M. Barday, K. Y. T. Ho, C. T. Halsall, C. Aïssa, *Org. Lett.* 2016, **8**, 1756.
2. G. A. Molander, B. W. Katona, F. Machrouhi, *J. Org. Chem.* **2002**, *67*, 8416.
3. D. A. Mundal, K. E. Lutz, R. J. Thomson, *J. Am. Chem. Soc.* **2012**, *134*, 5782.
4. K. Jouvin, F. Couty, G. Evano, *Org. Lett.* **2010**, *12*, 3272.
5. J. H. Song, P. Choi, S. E. Lee, K. H. Jeong, T. Kim, K. S. Kang, Y. S. Choi, J. Ham, *Eur. J. Org. Chem.* **2013**, 6249.
6. J. Y. Hamilton, D. Sarlah, E. M. Carreira, *Angew. Chem. Int. Ed.* **2013**, *52*, 7532.

Compound 14 (<sup>1</sup>H NMR in MeCN-d<sub>3</sub>)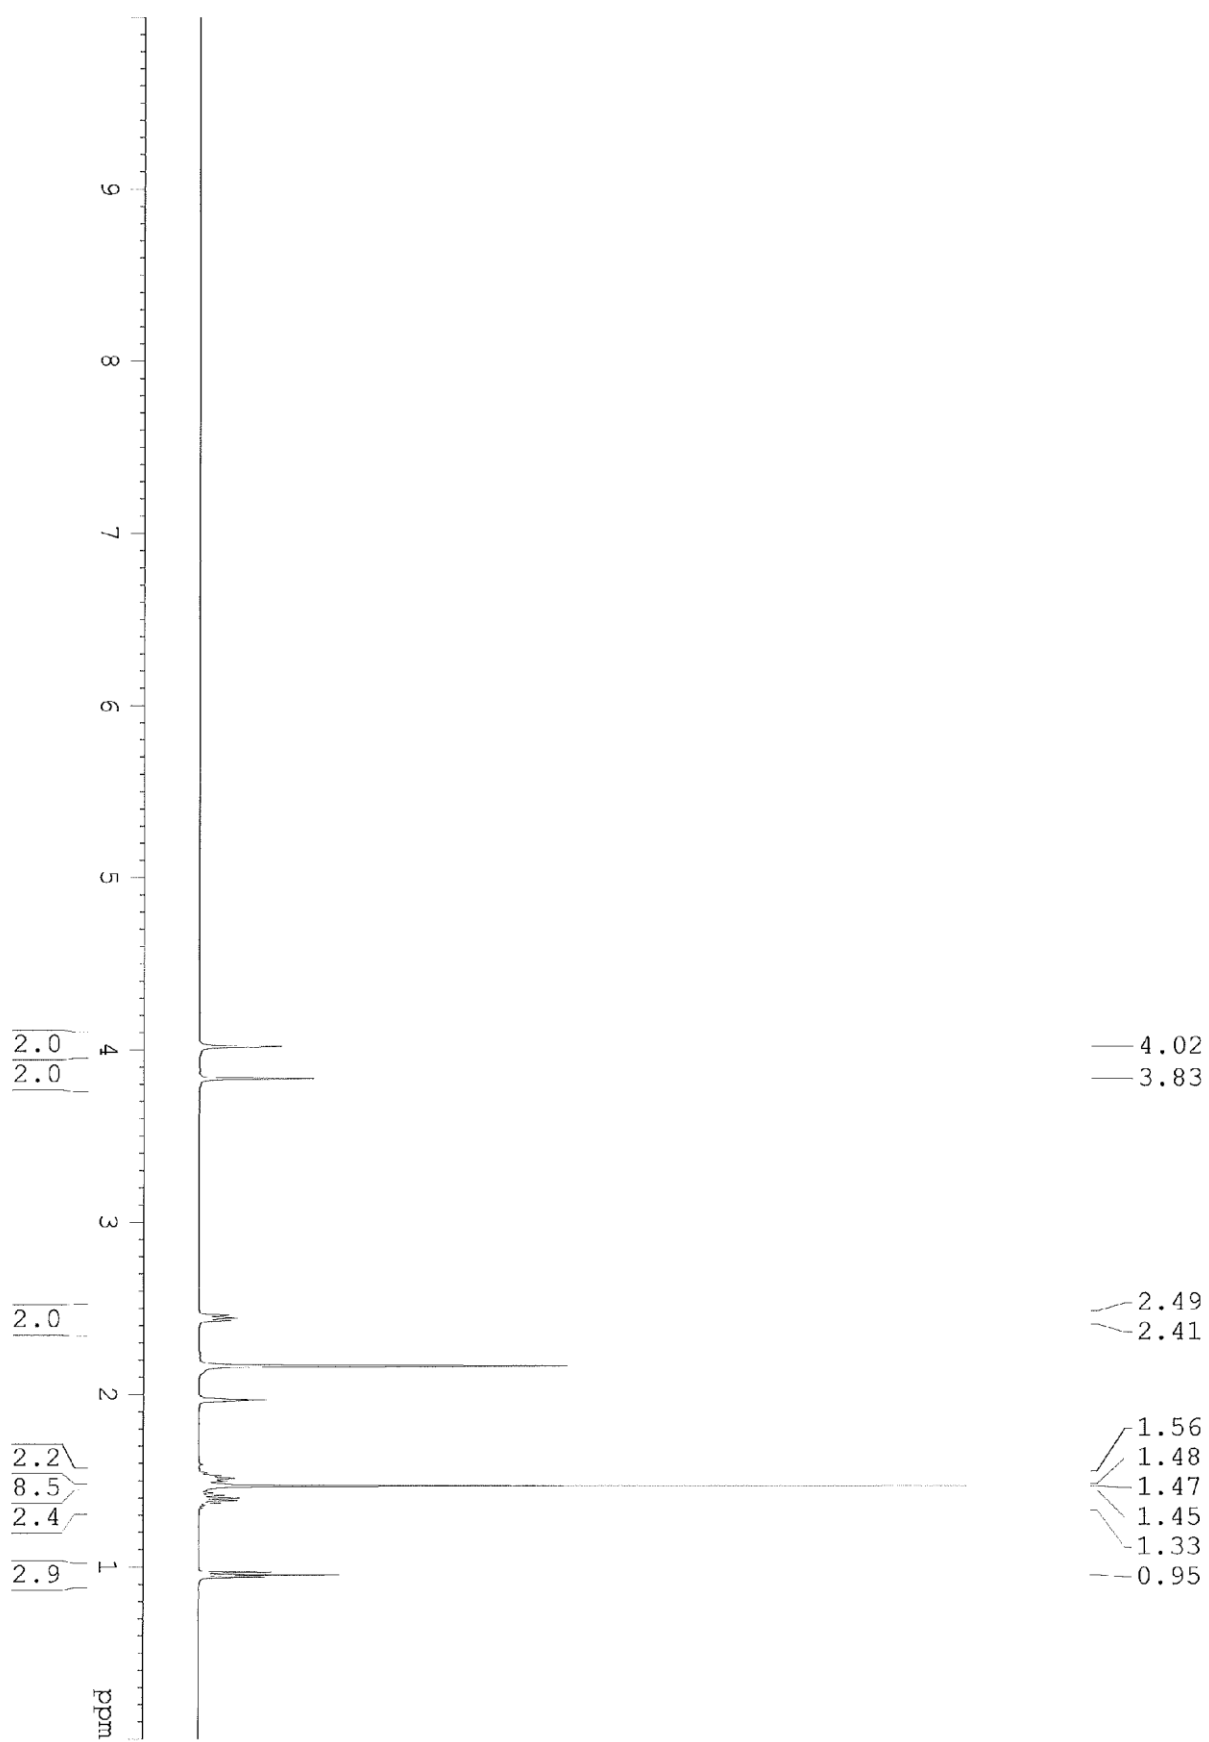

Compound 14 ( $^{13}\text{C}$  NMR in  $\text{MeCN-d}_3$ )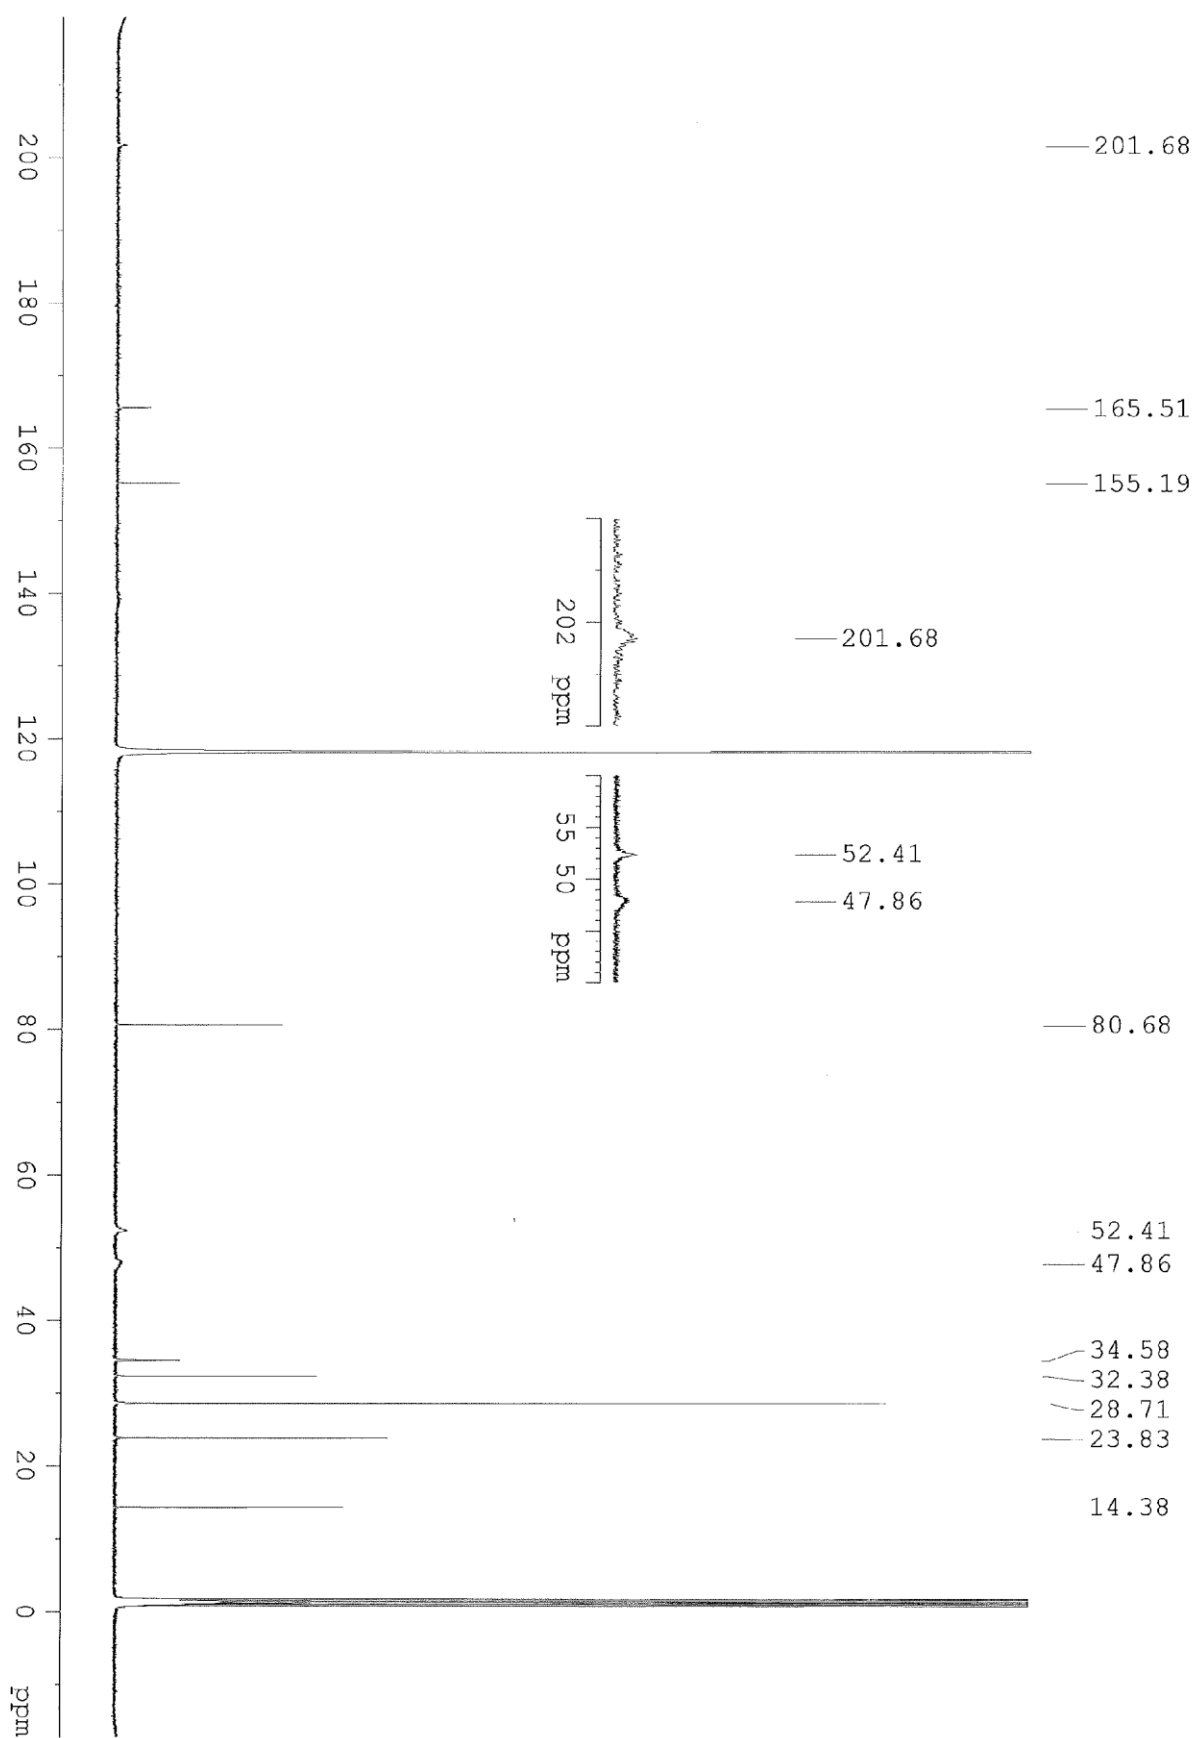



Compound 14 (19F NMR in MeCN-d3)

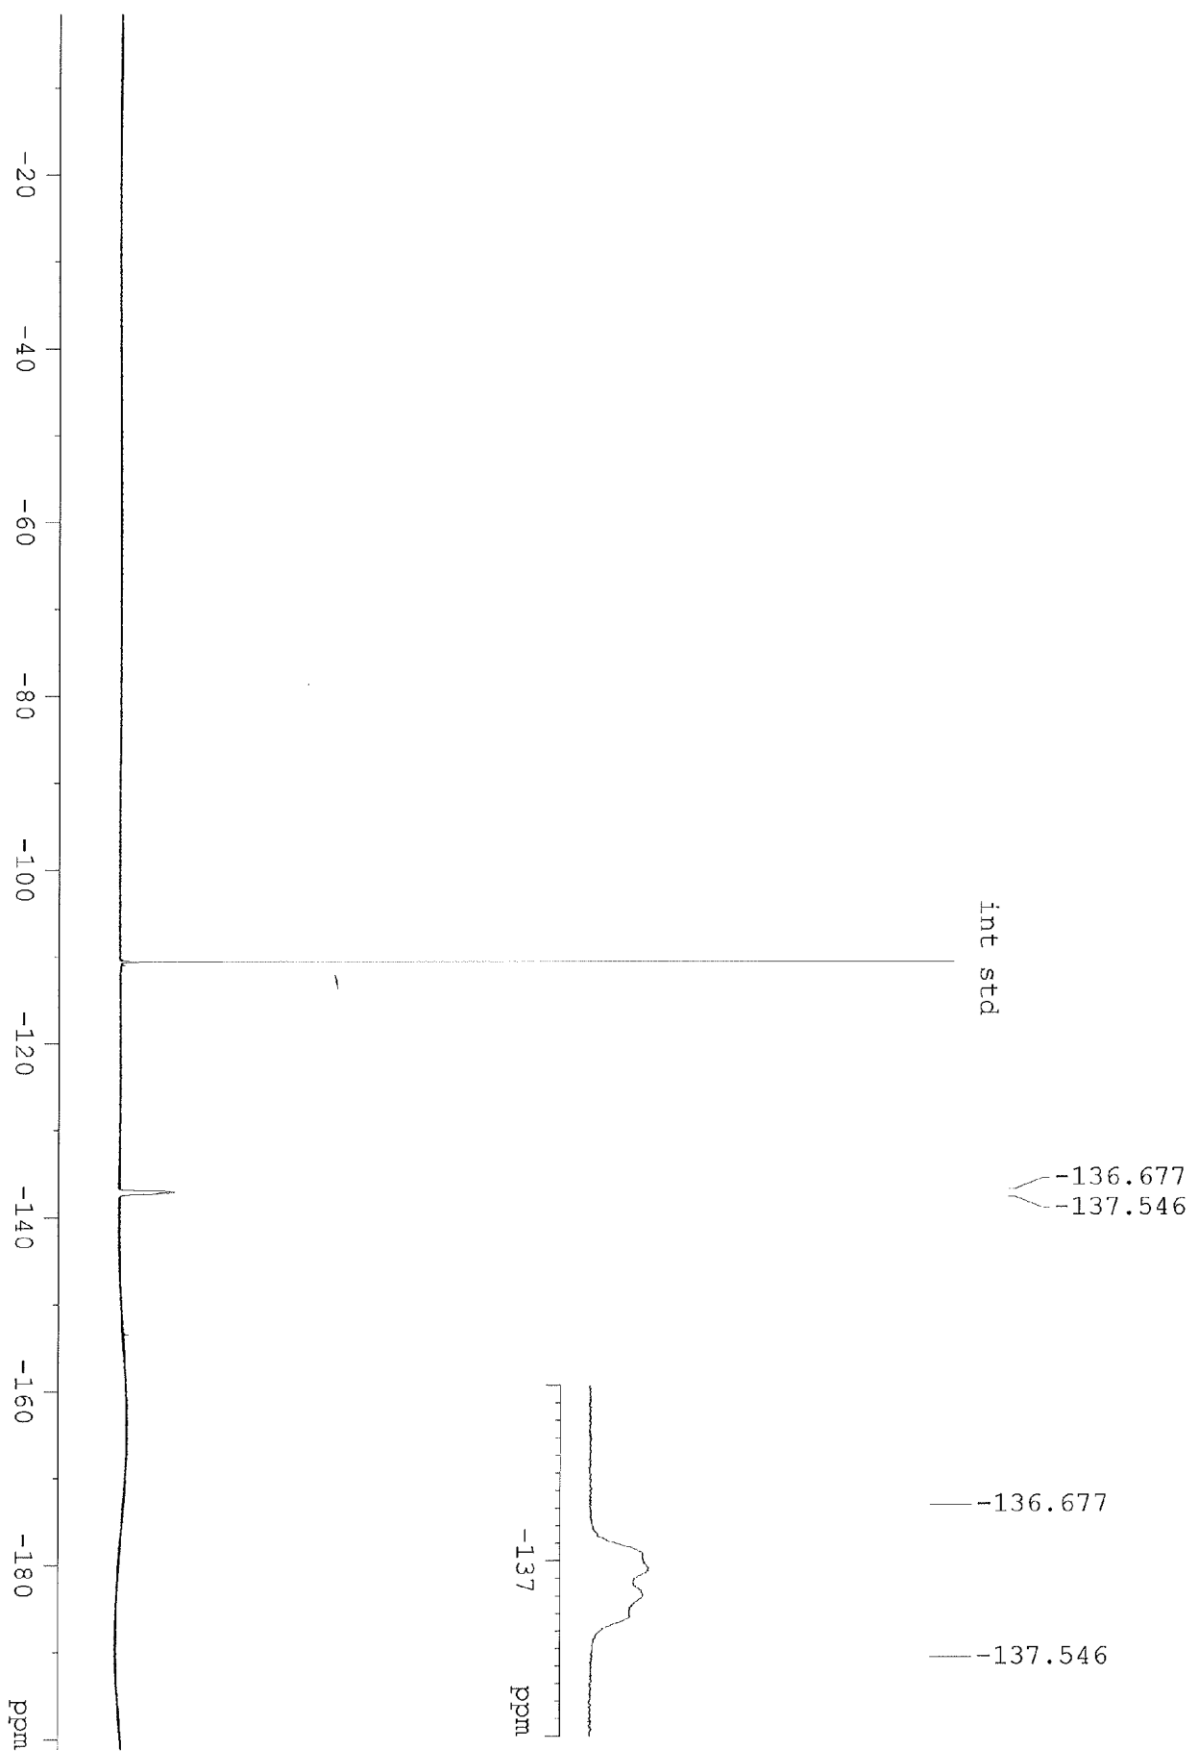

Compound 14 (11B NMR in MeCN-d<sub>3</sub>)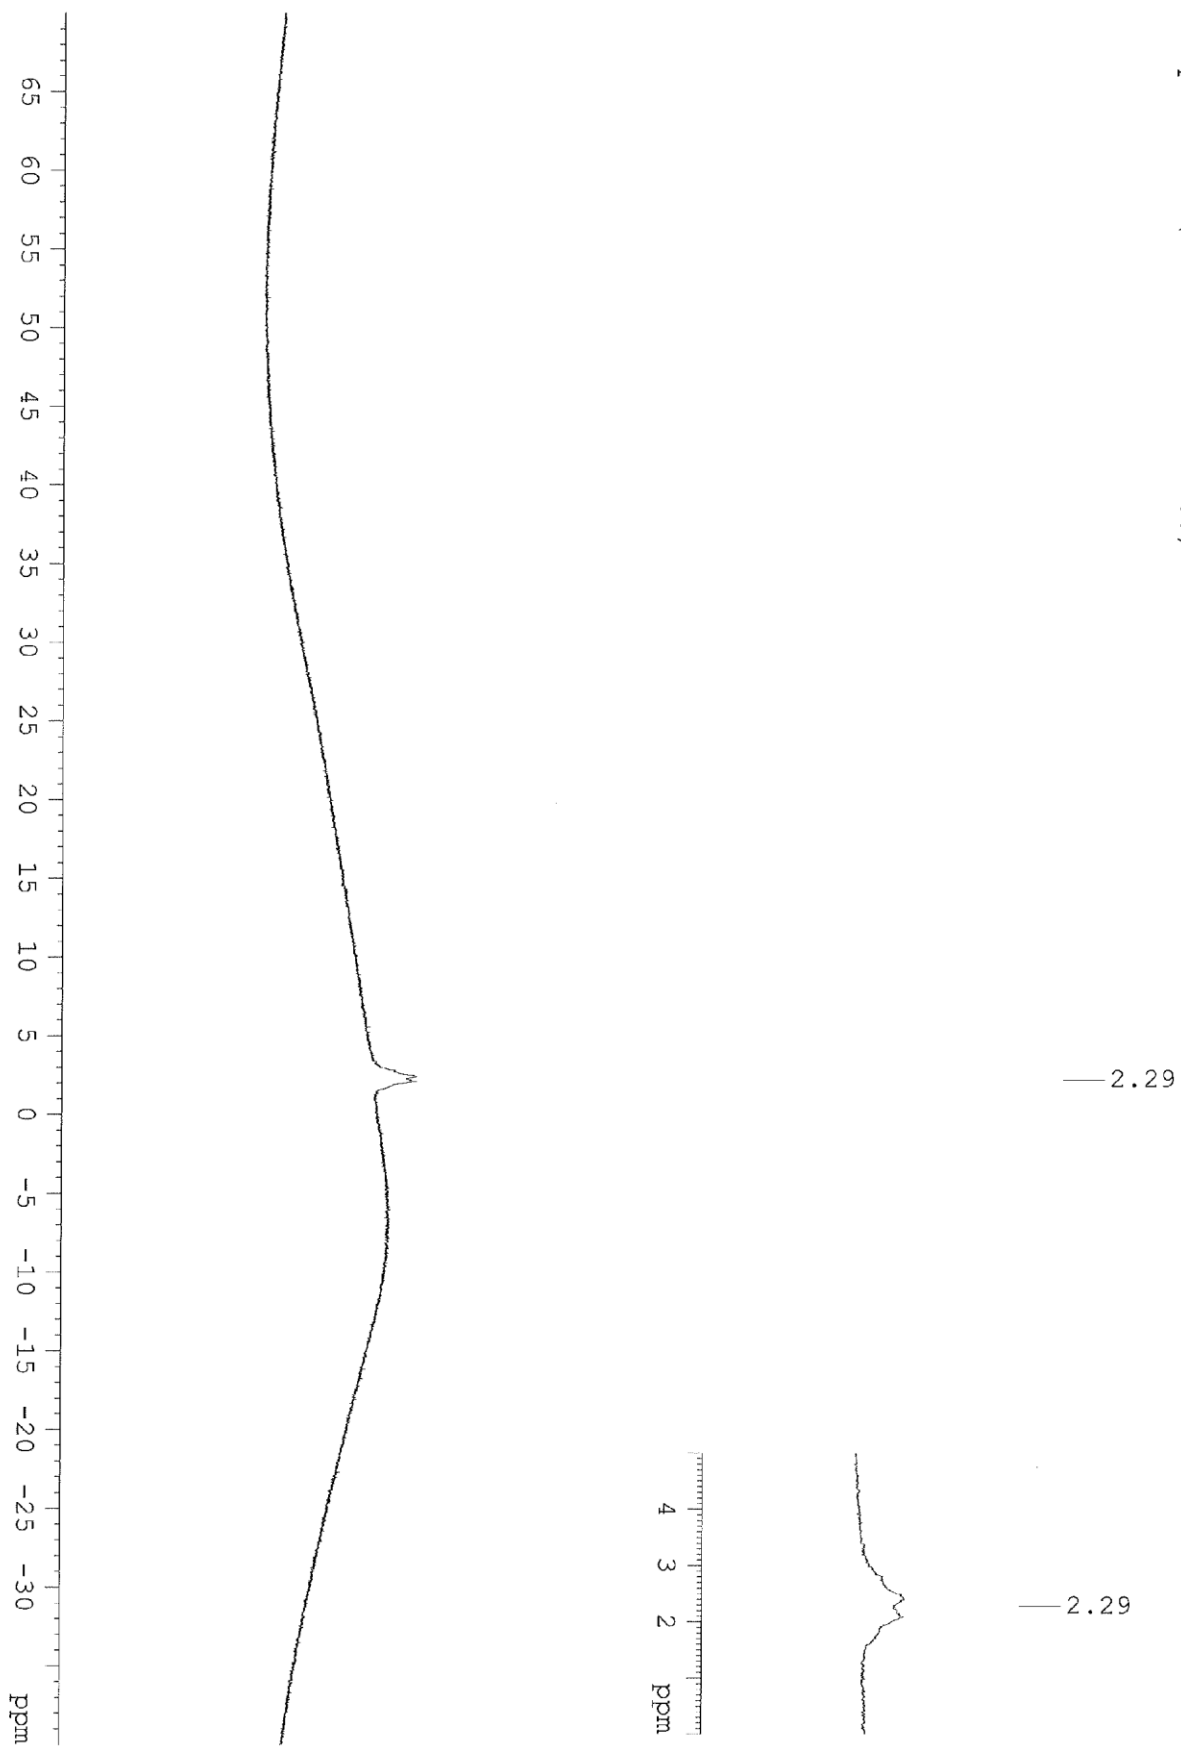

Compound 15 ( $^1\text{H}$  NMR in MeCN- $d_3$ )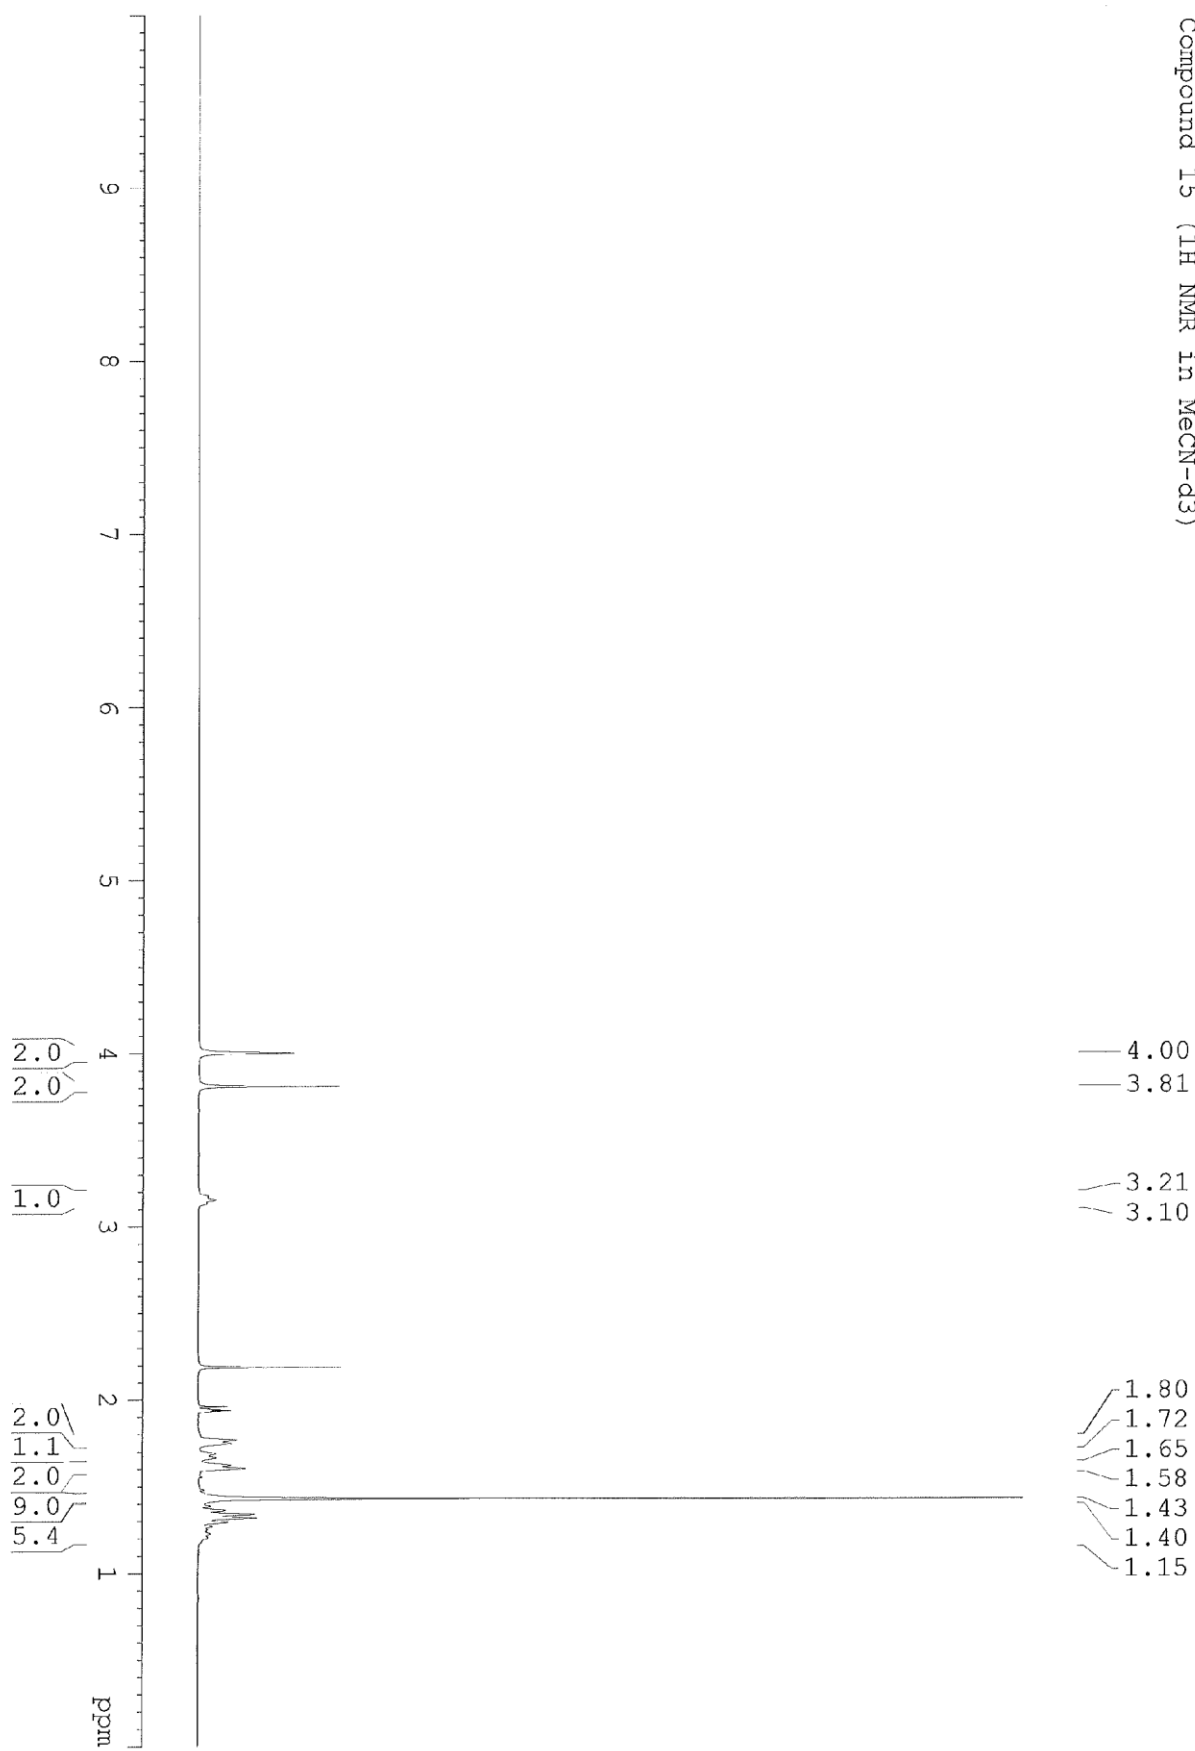

Compound 15 ( $^{13}\text{C}$  NMR in  $\text{MeCN-d}_3$ )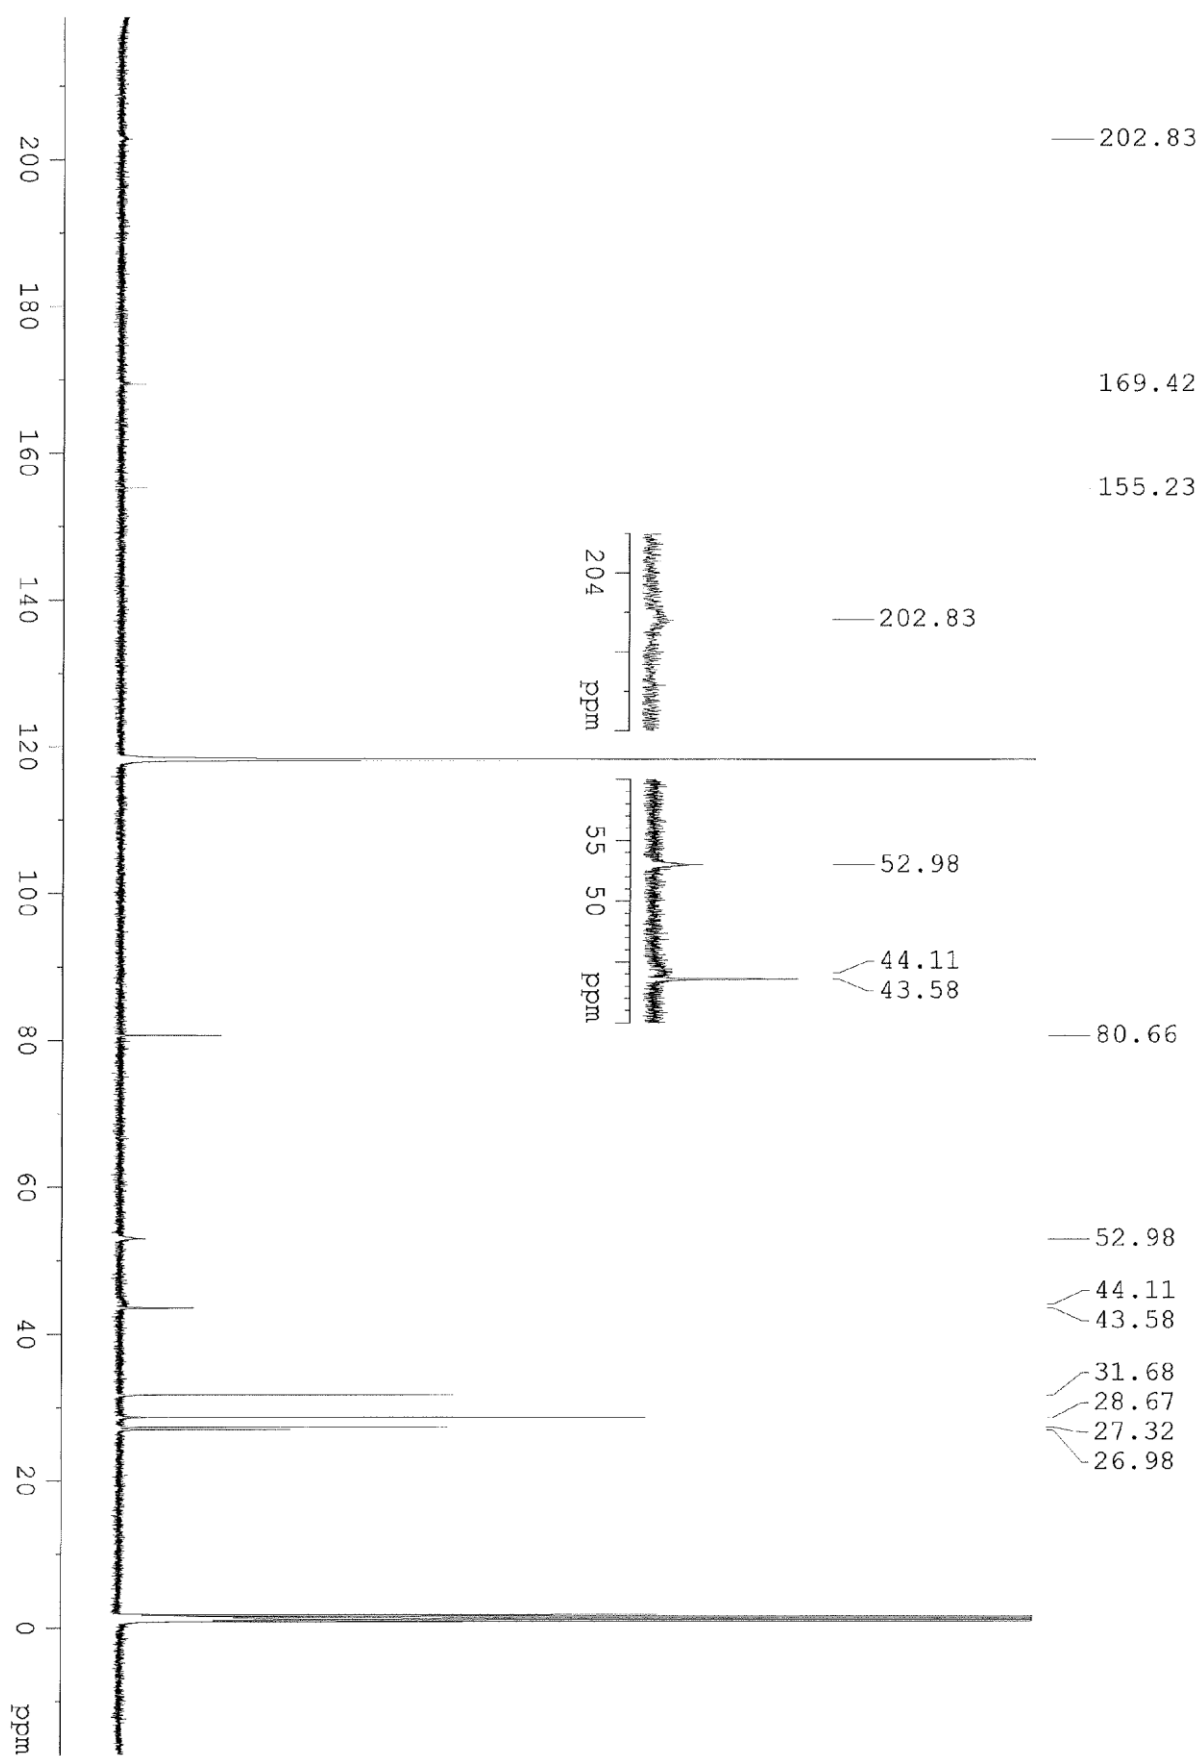

Compound 15 (19F NMR in MeCN-d3)

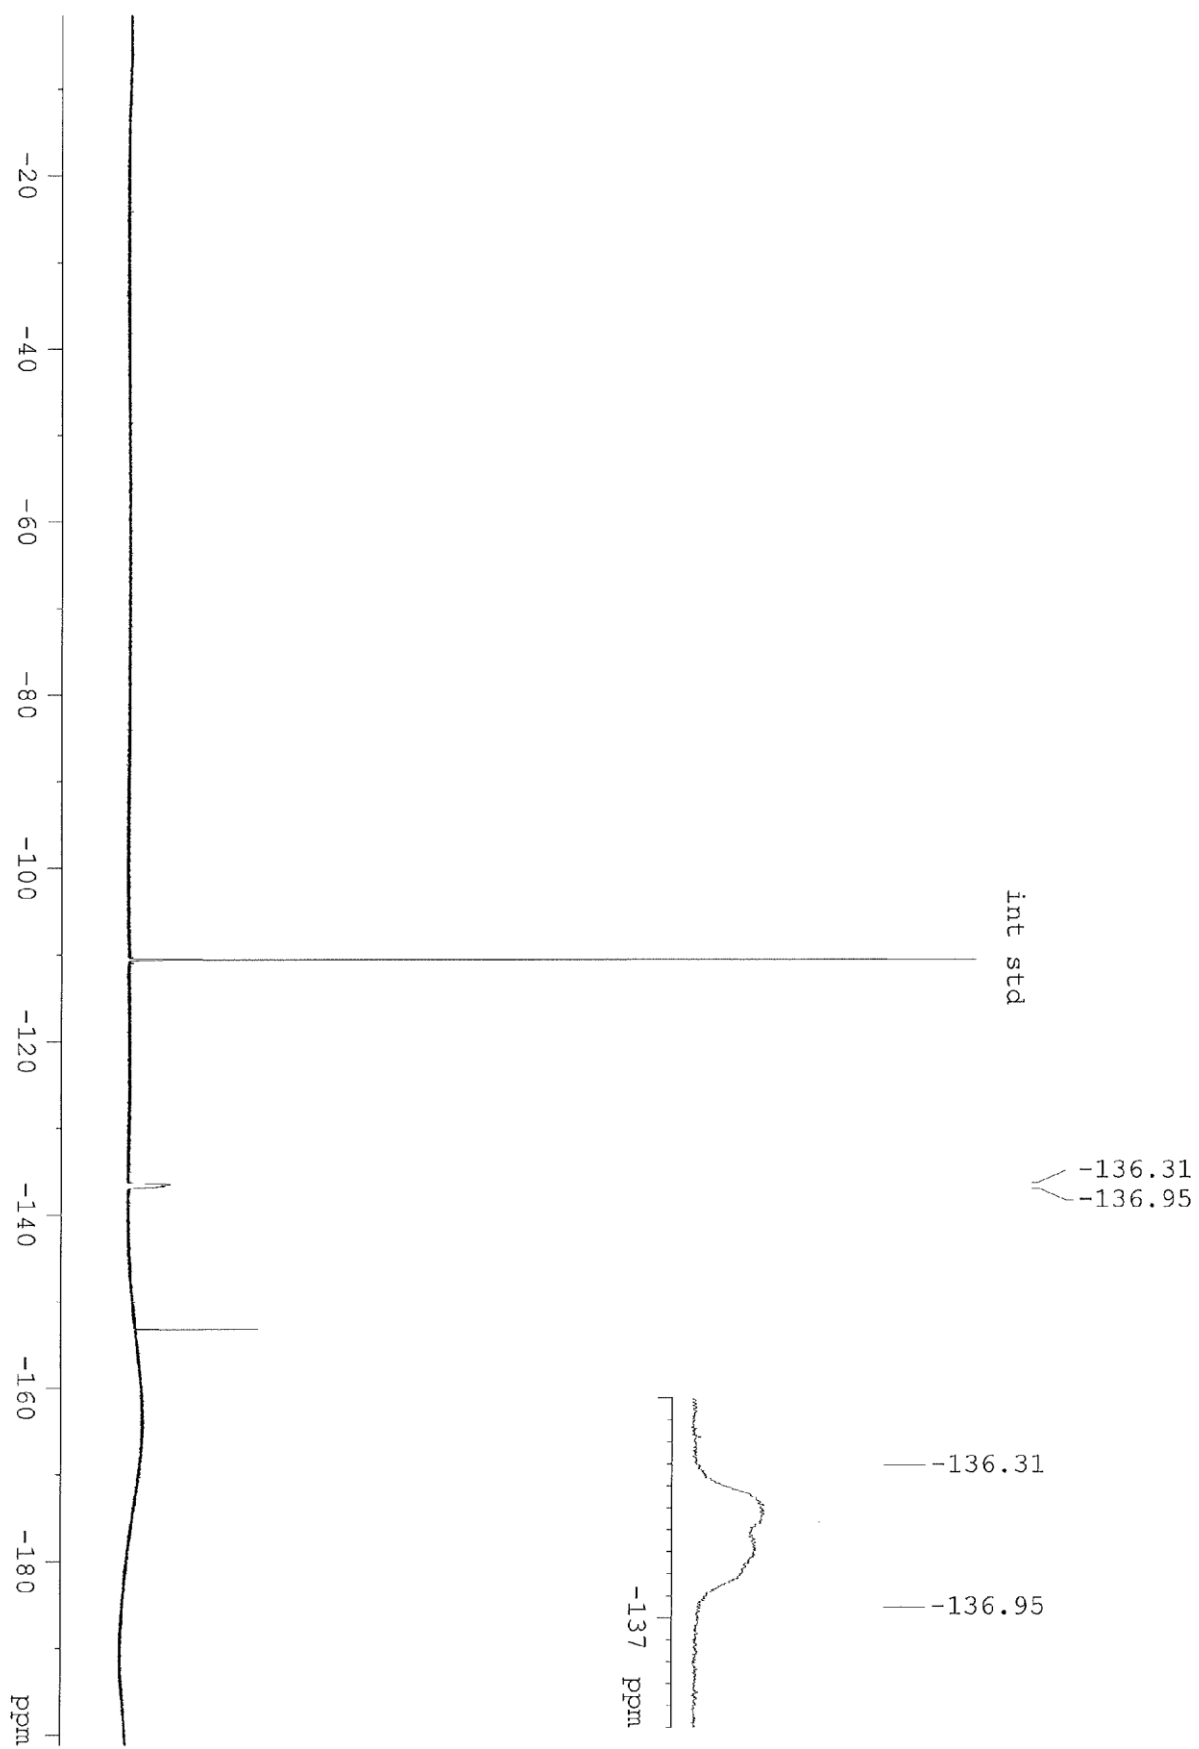

Compound 15 (11B NMR in MeCN-d<sub>3</sub>)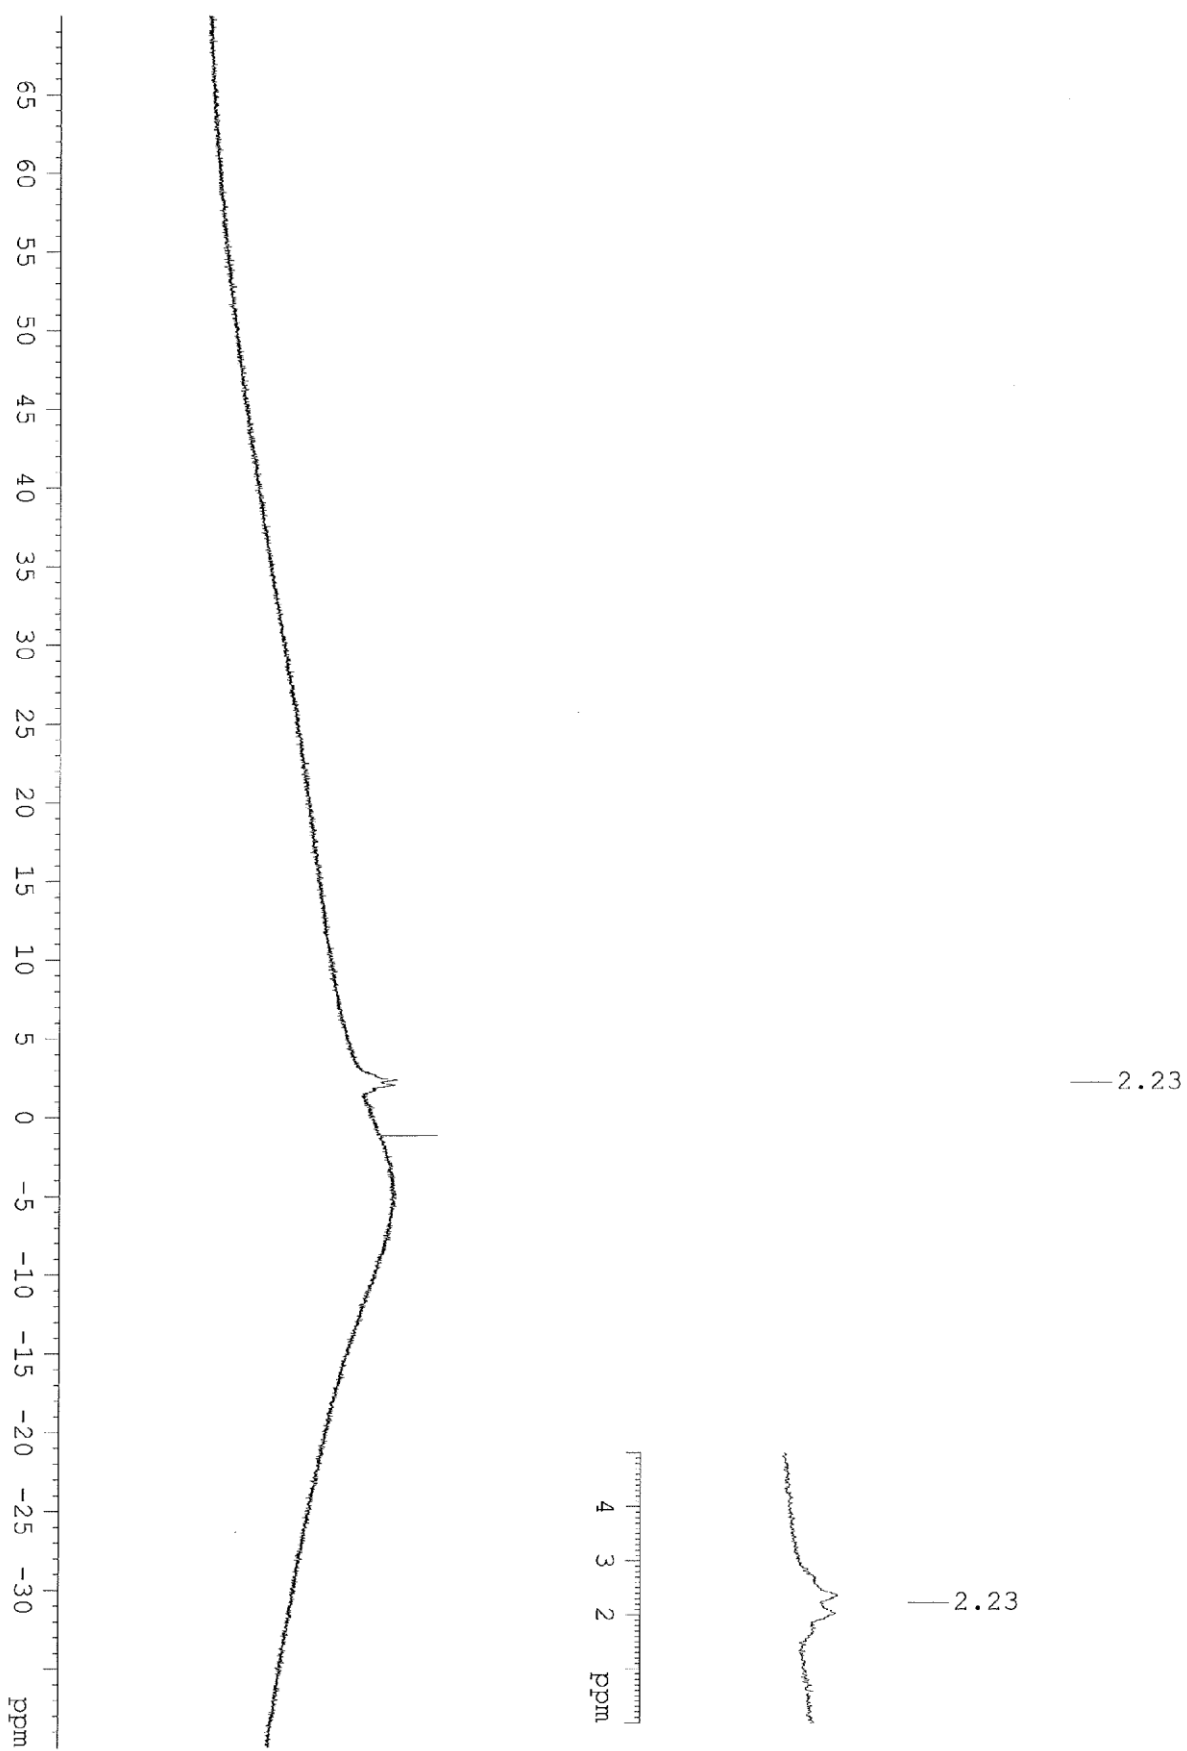

Compound 16 (<sup>1</sup>H NMR in DMSO-d<sub>6</sub>)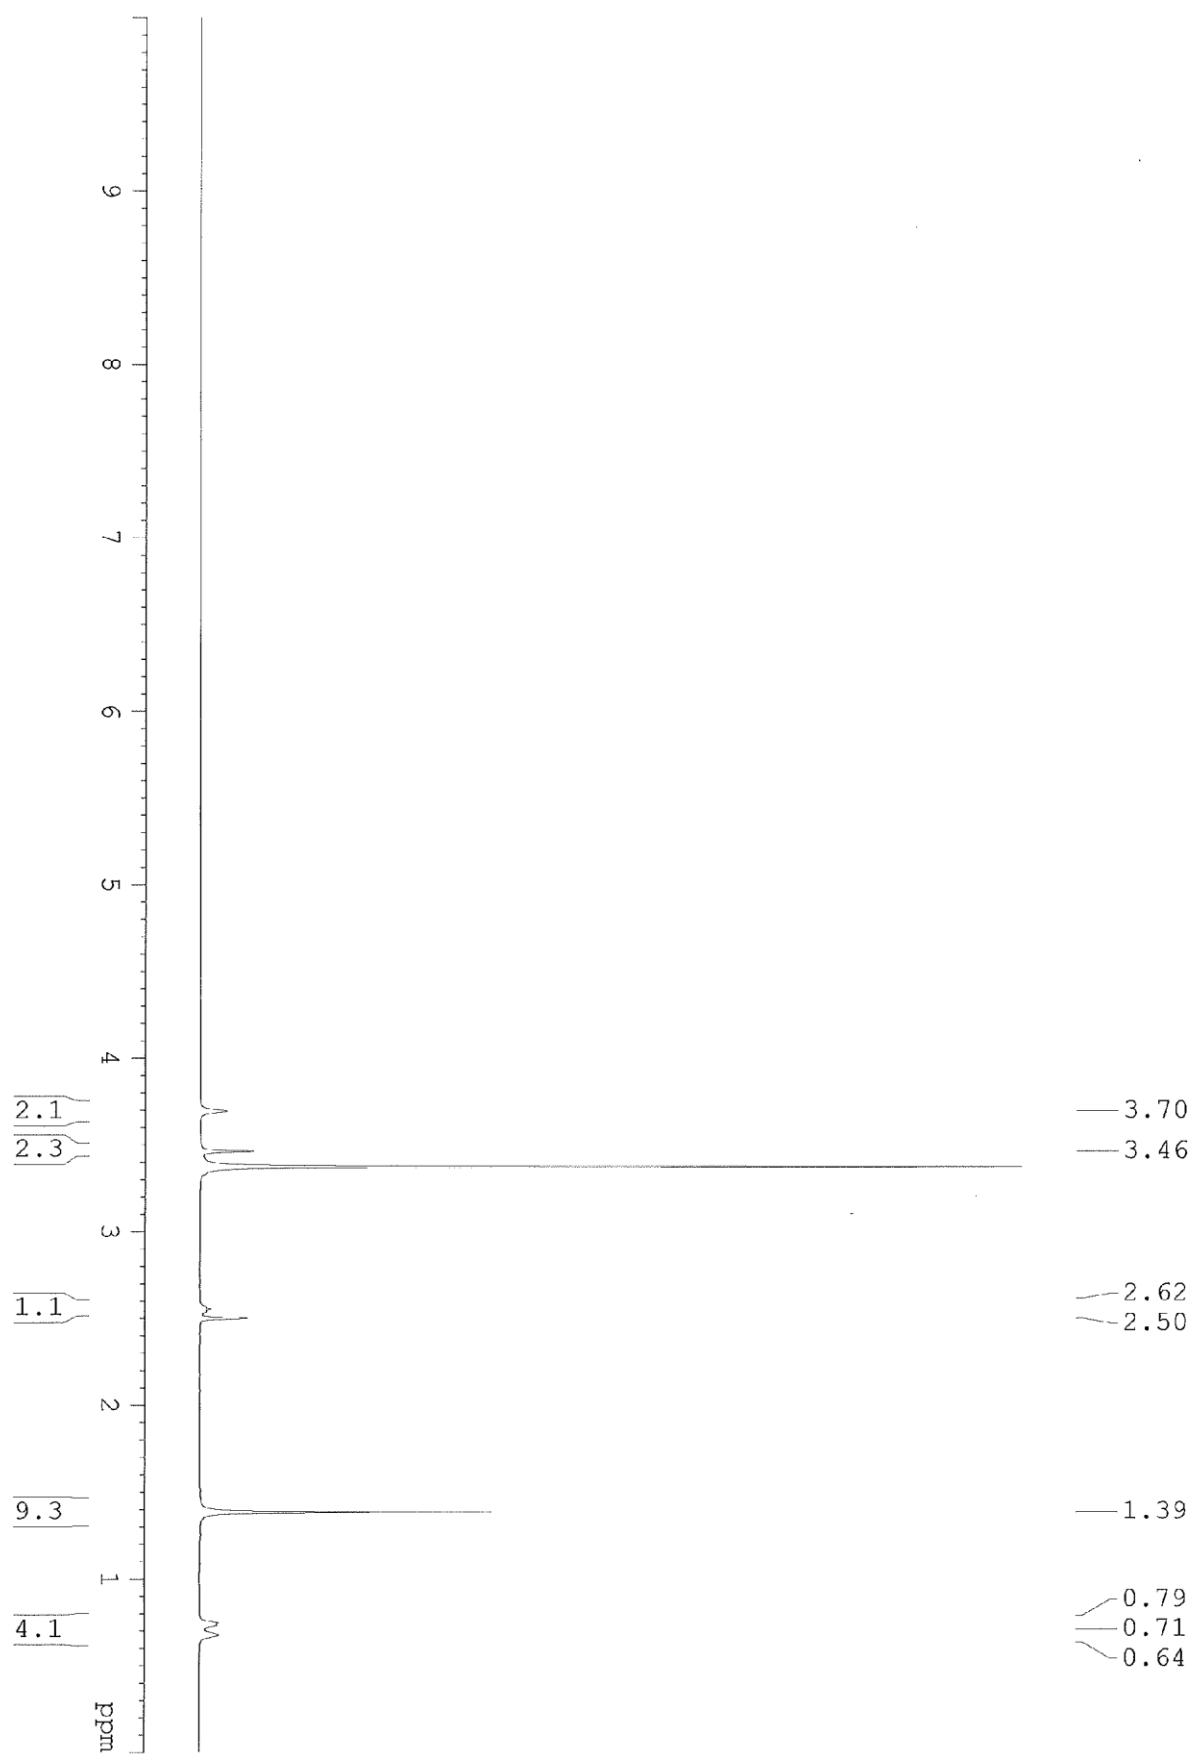

Compound 16 ( $^{13}\text{C}$  NMR in  $\text{DMSO-d}_6$ )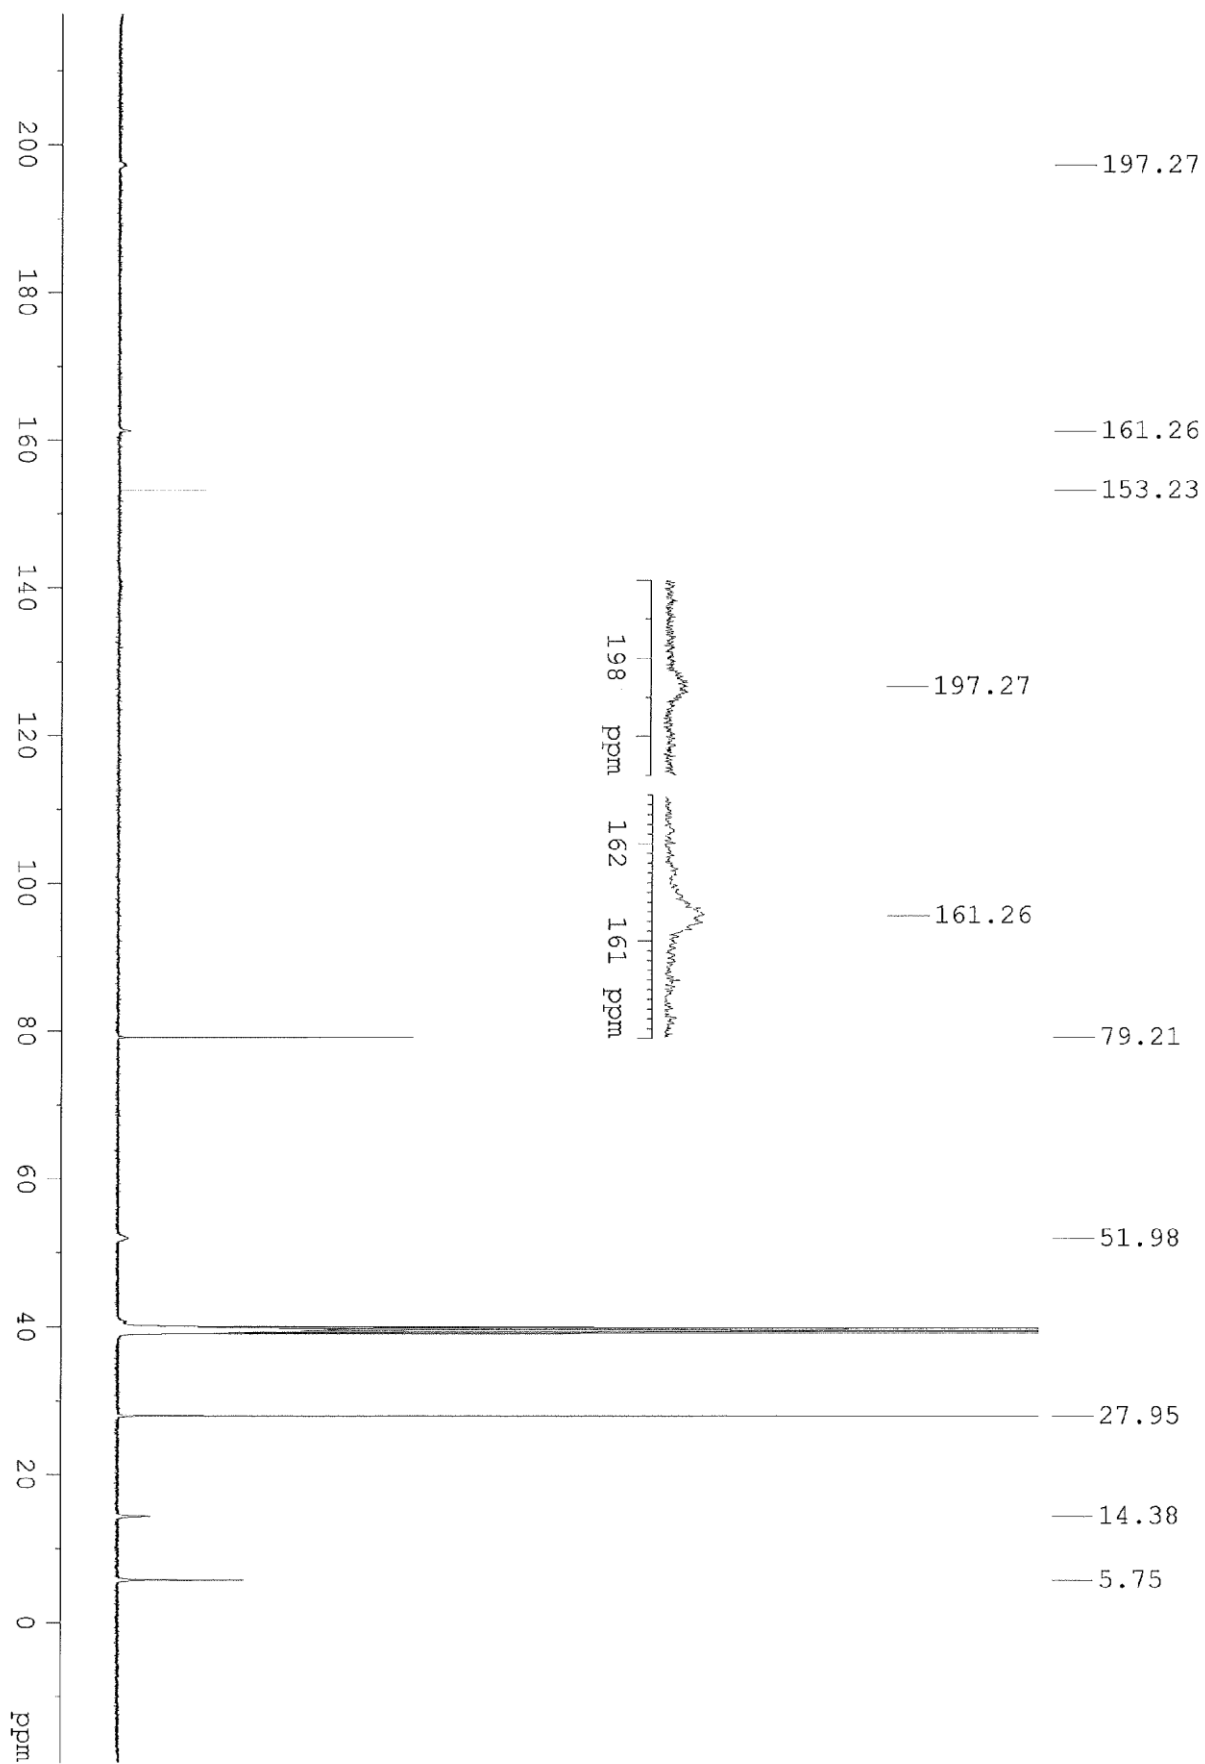



Compound 16 (19F NMR in DMSO-d6)

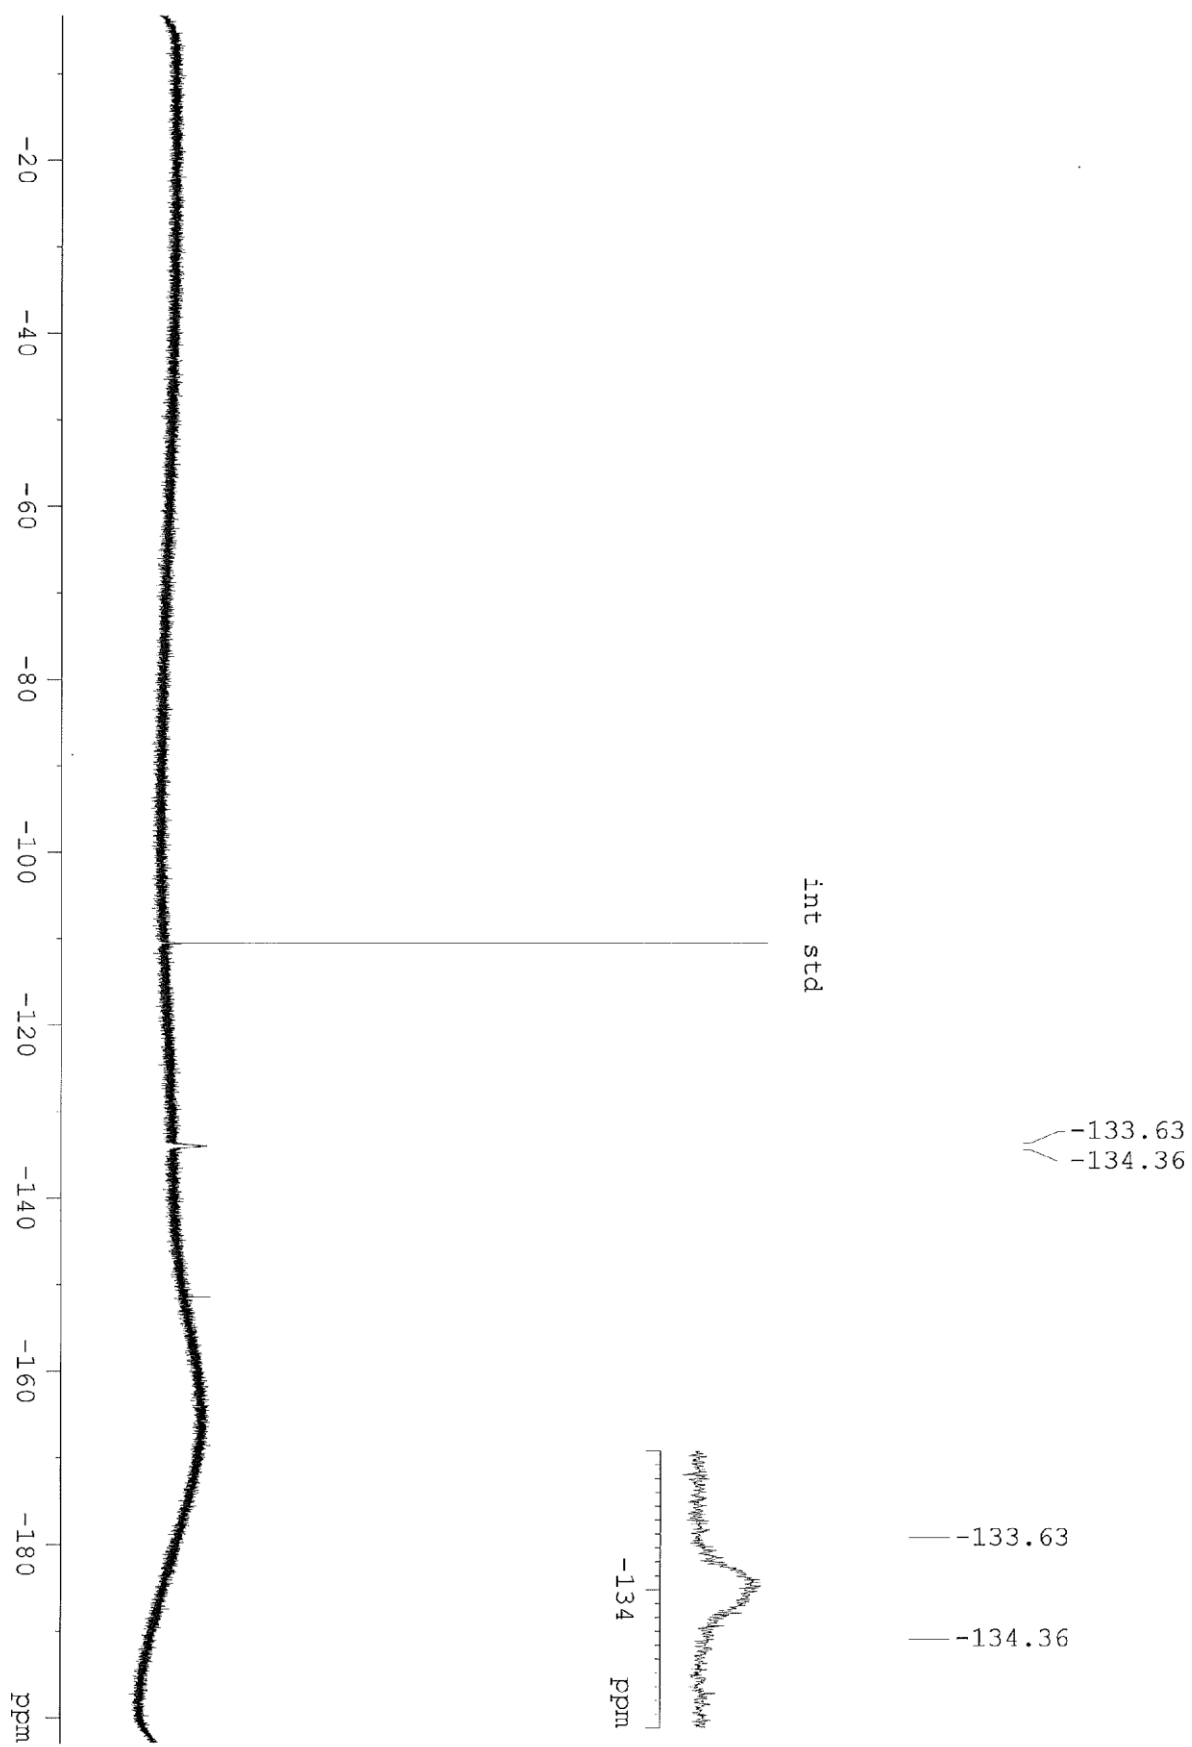

Compound 16 (11B NMR in MeCN-d<sub>3</sub>)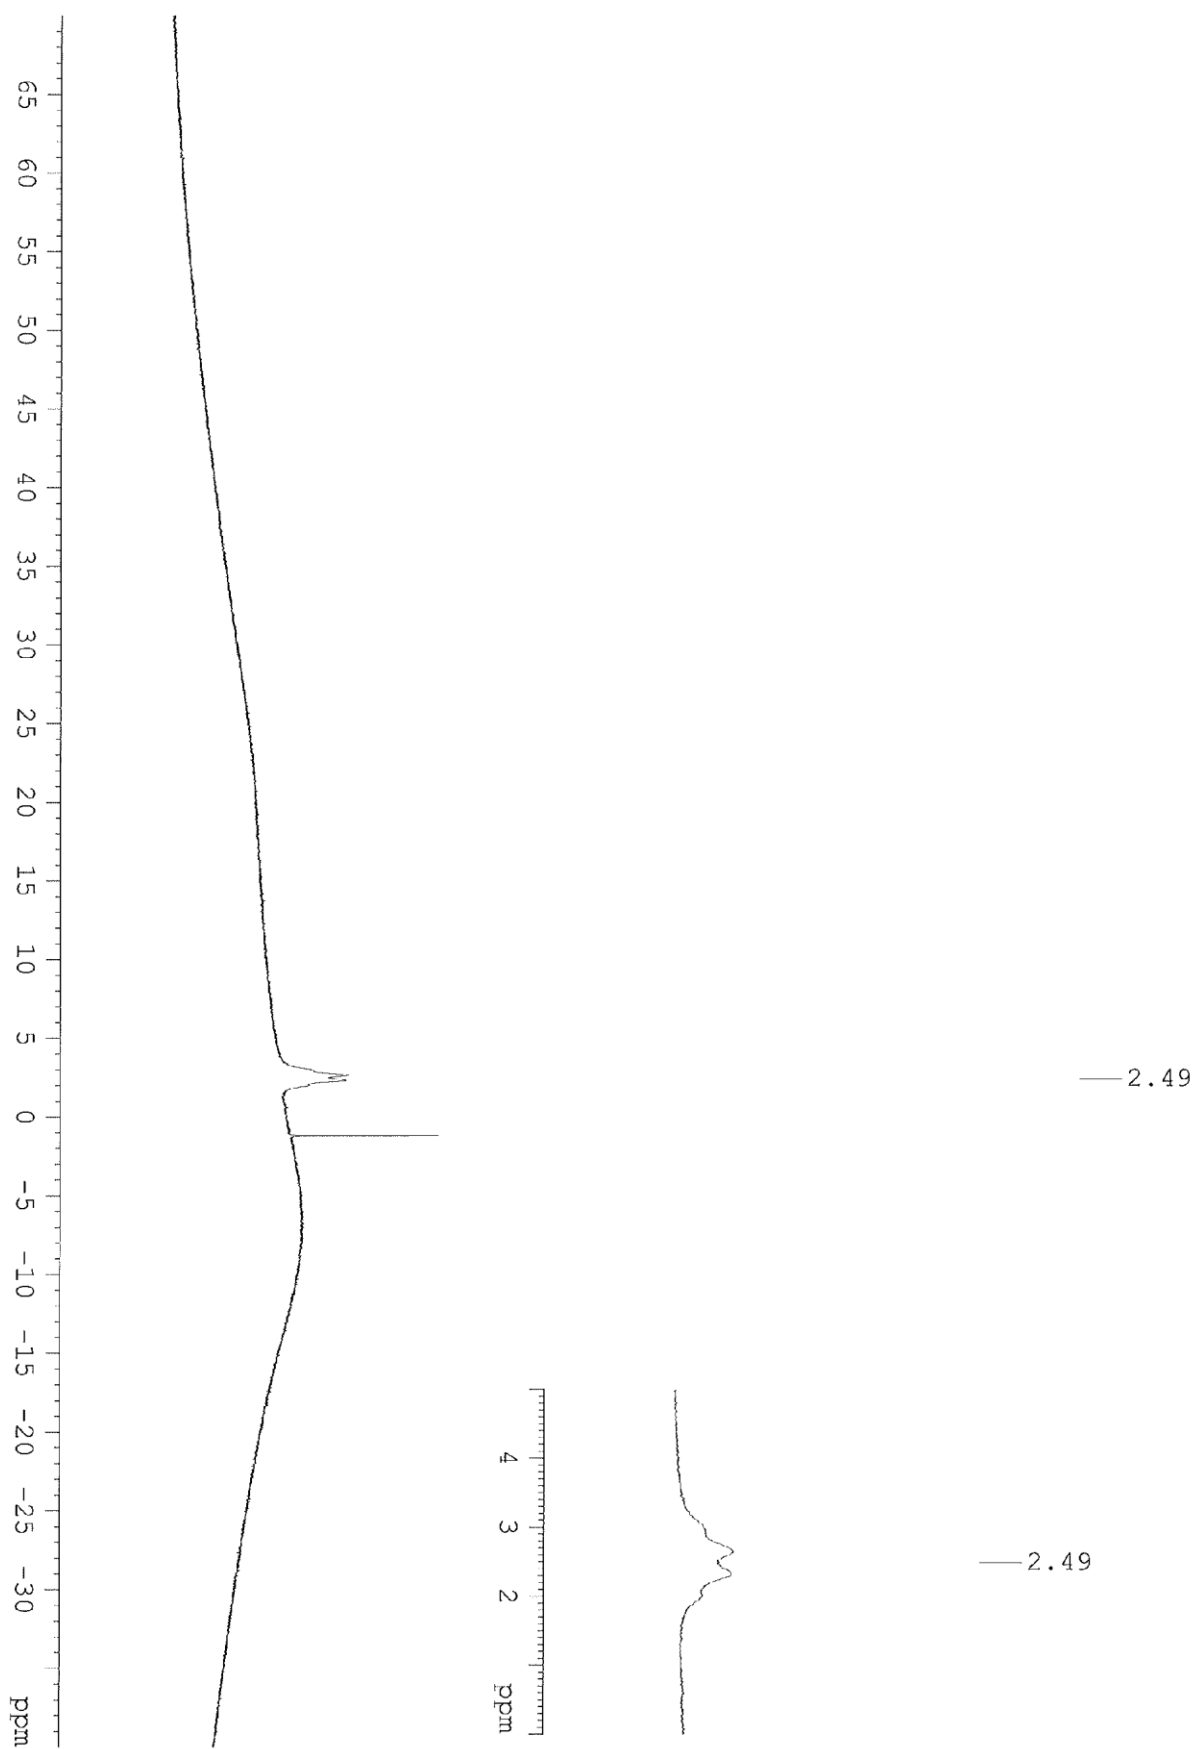

Compound 17 (<sup>1</sup>H NMR in DMSO-d<sub>6</sub>)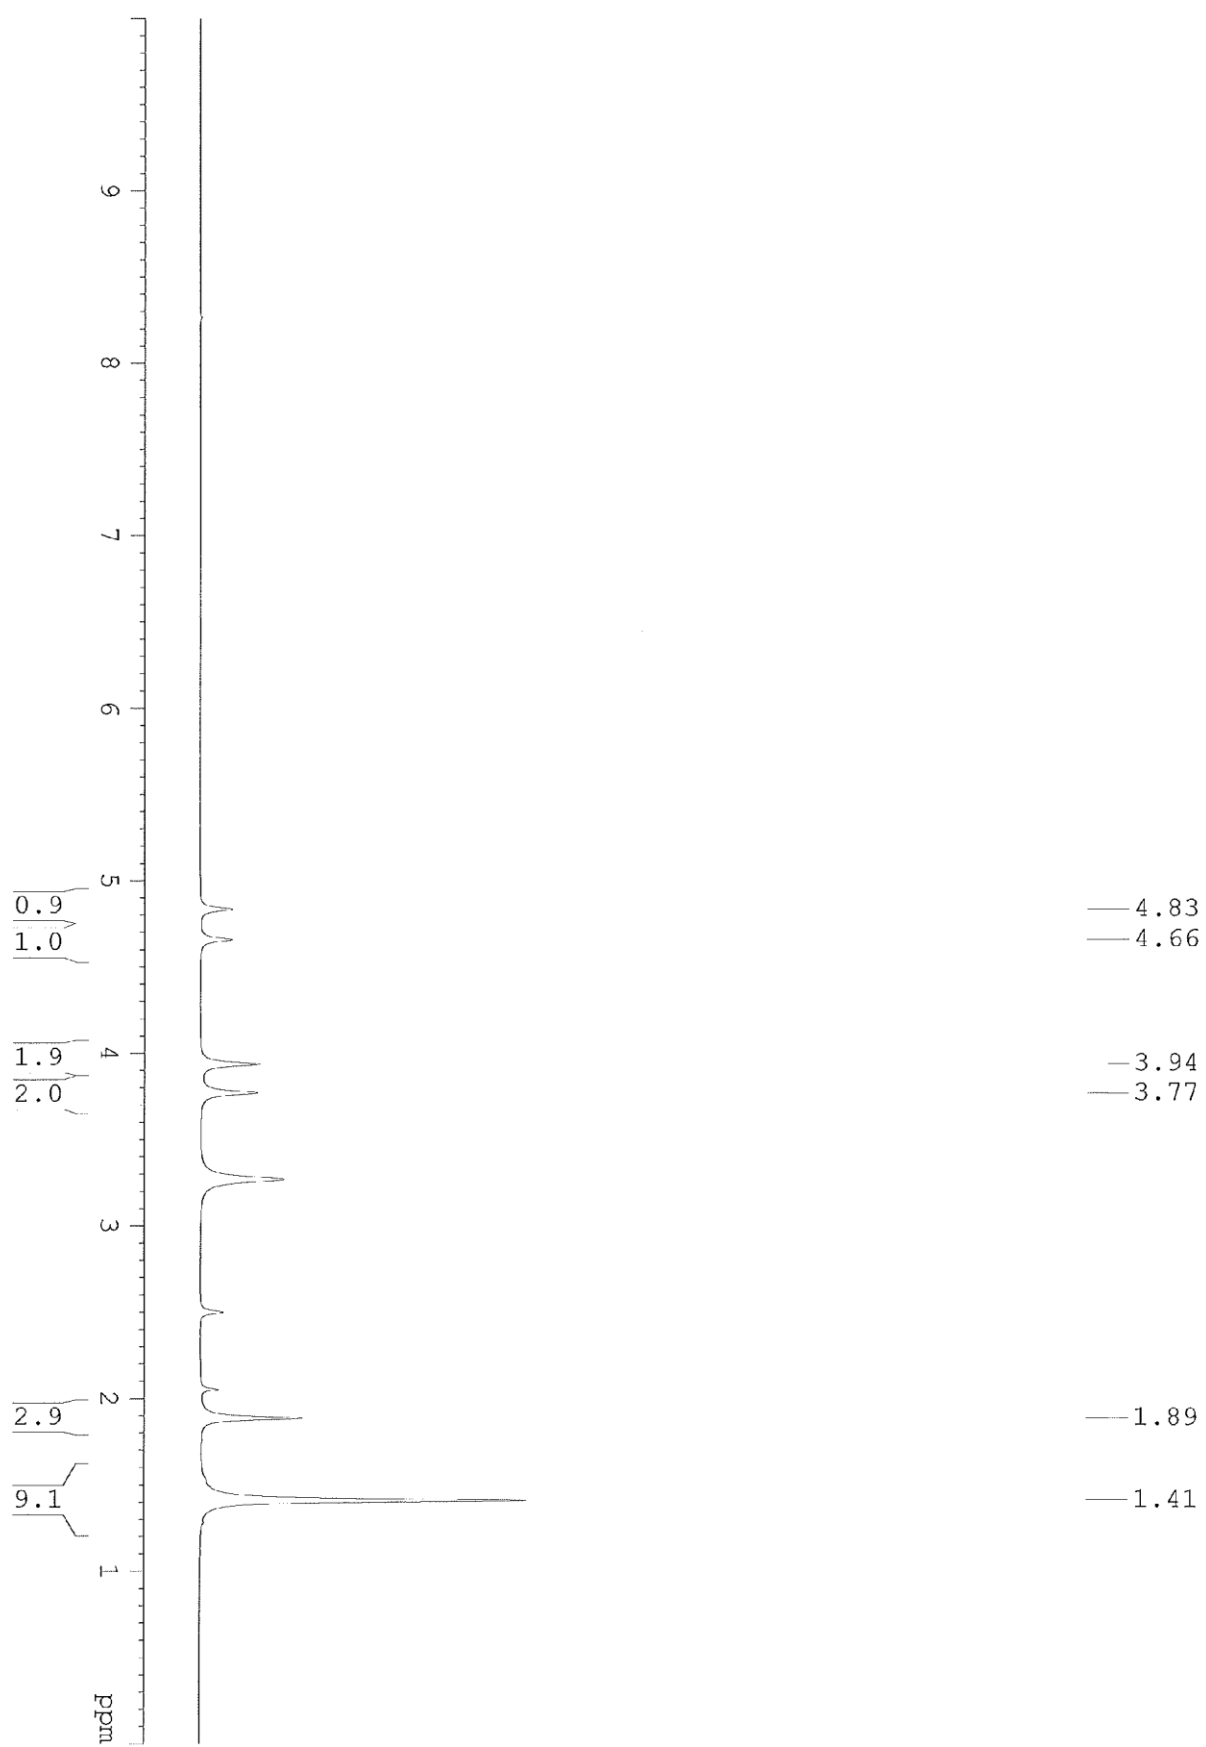

Compound 17 ( $^{13}\text{C}$  NMR in  $\text{DMSO-d}_6$ )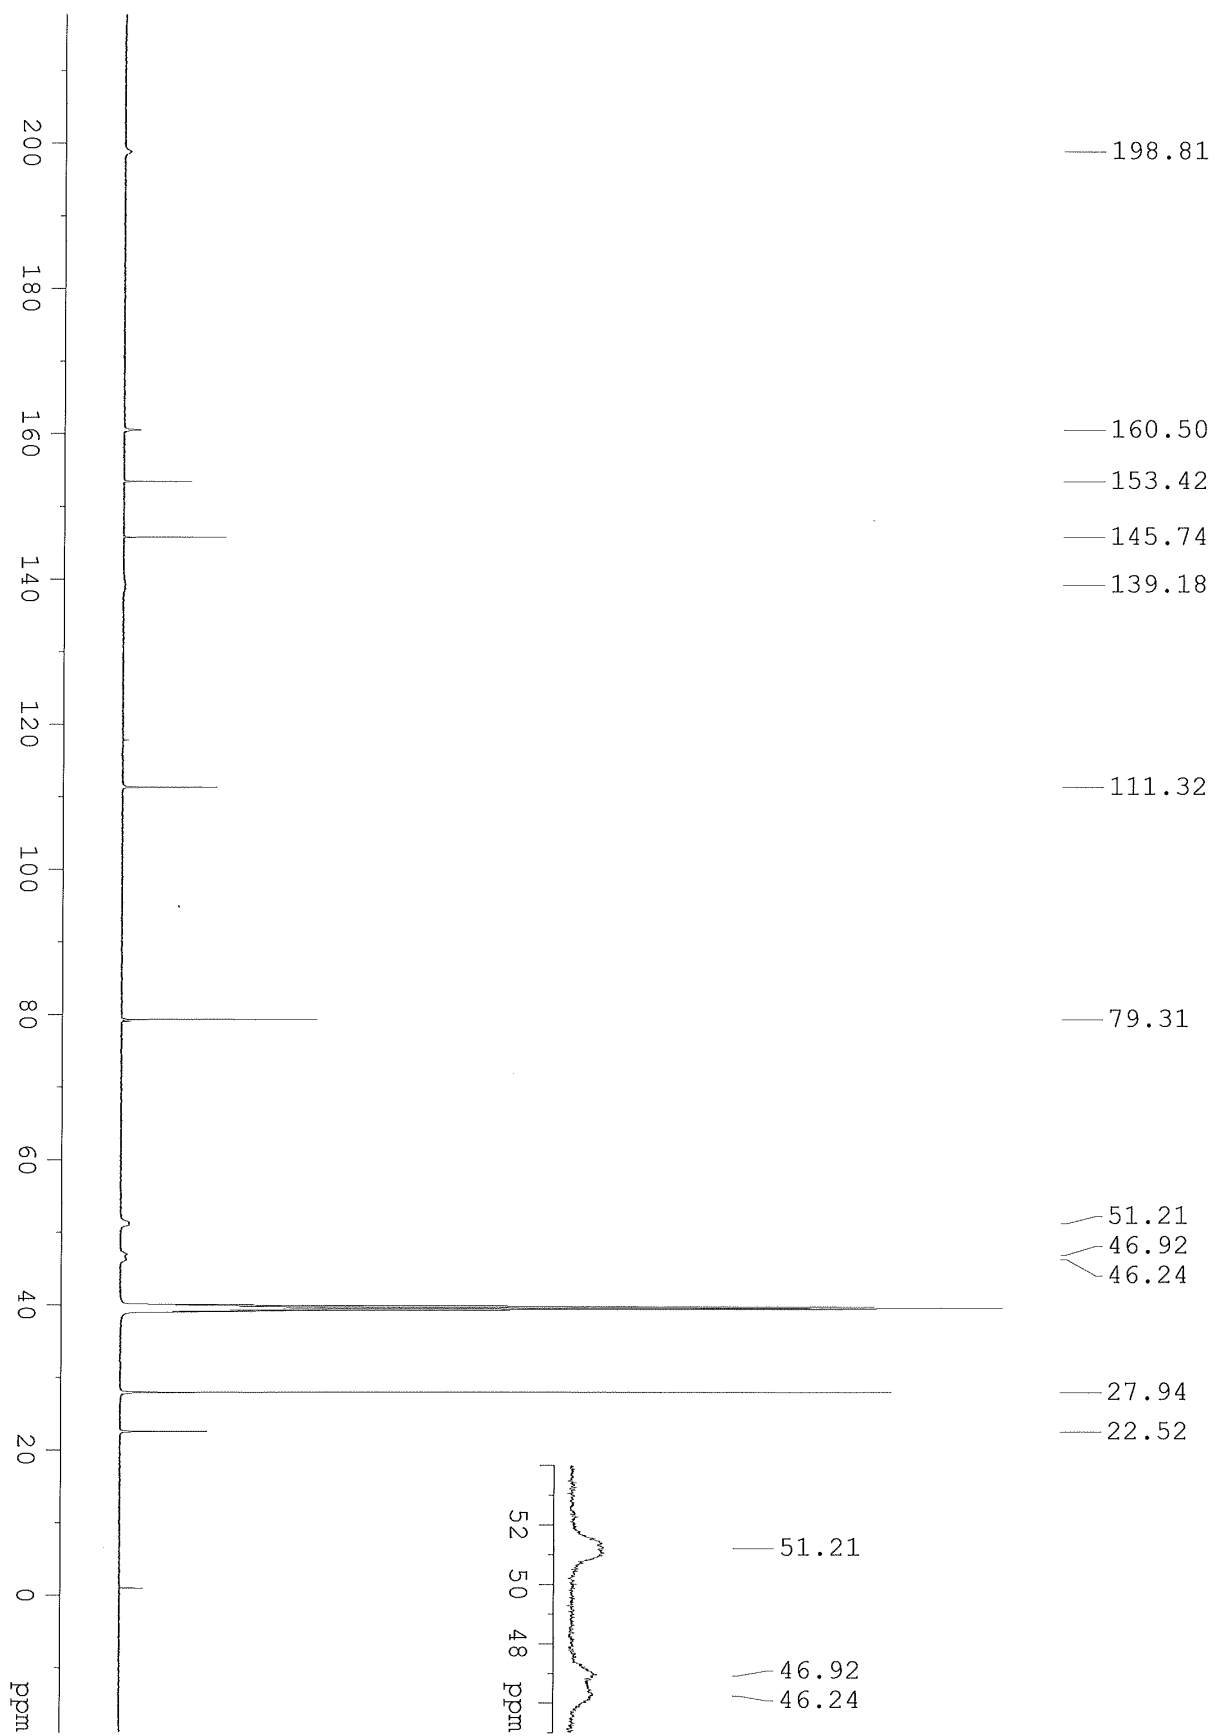

Compound 17 (19F NMR in MeCN-d3)

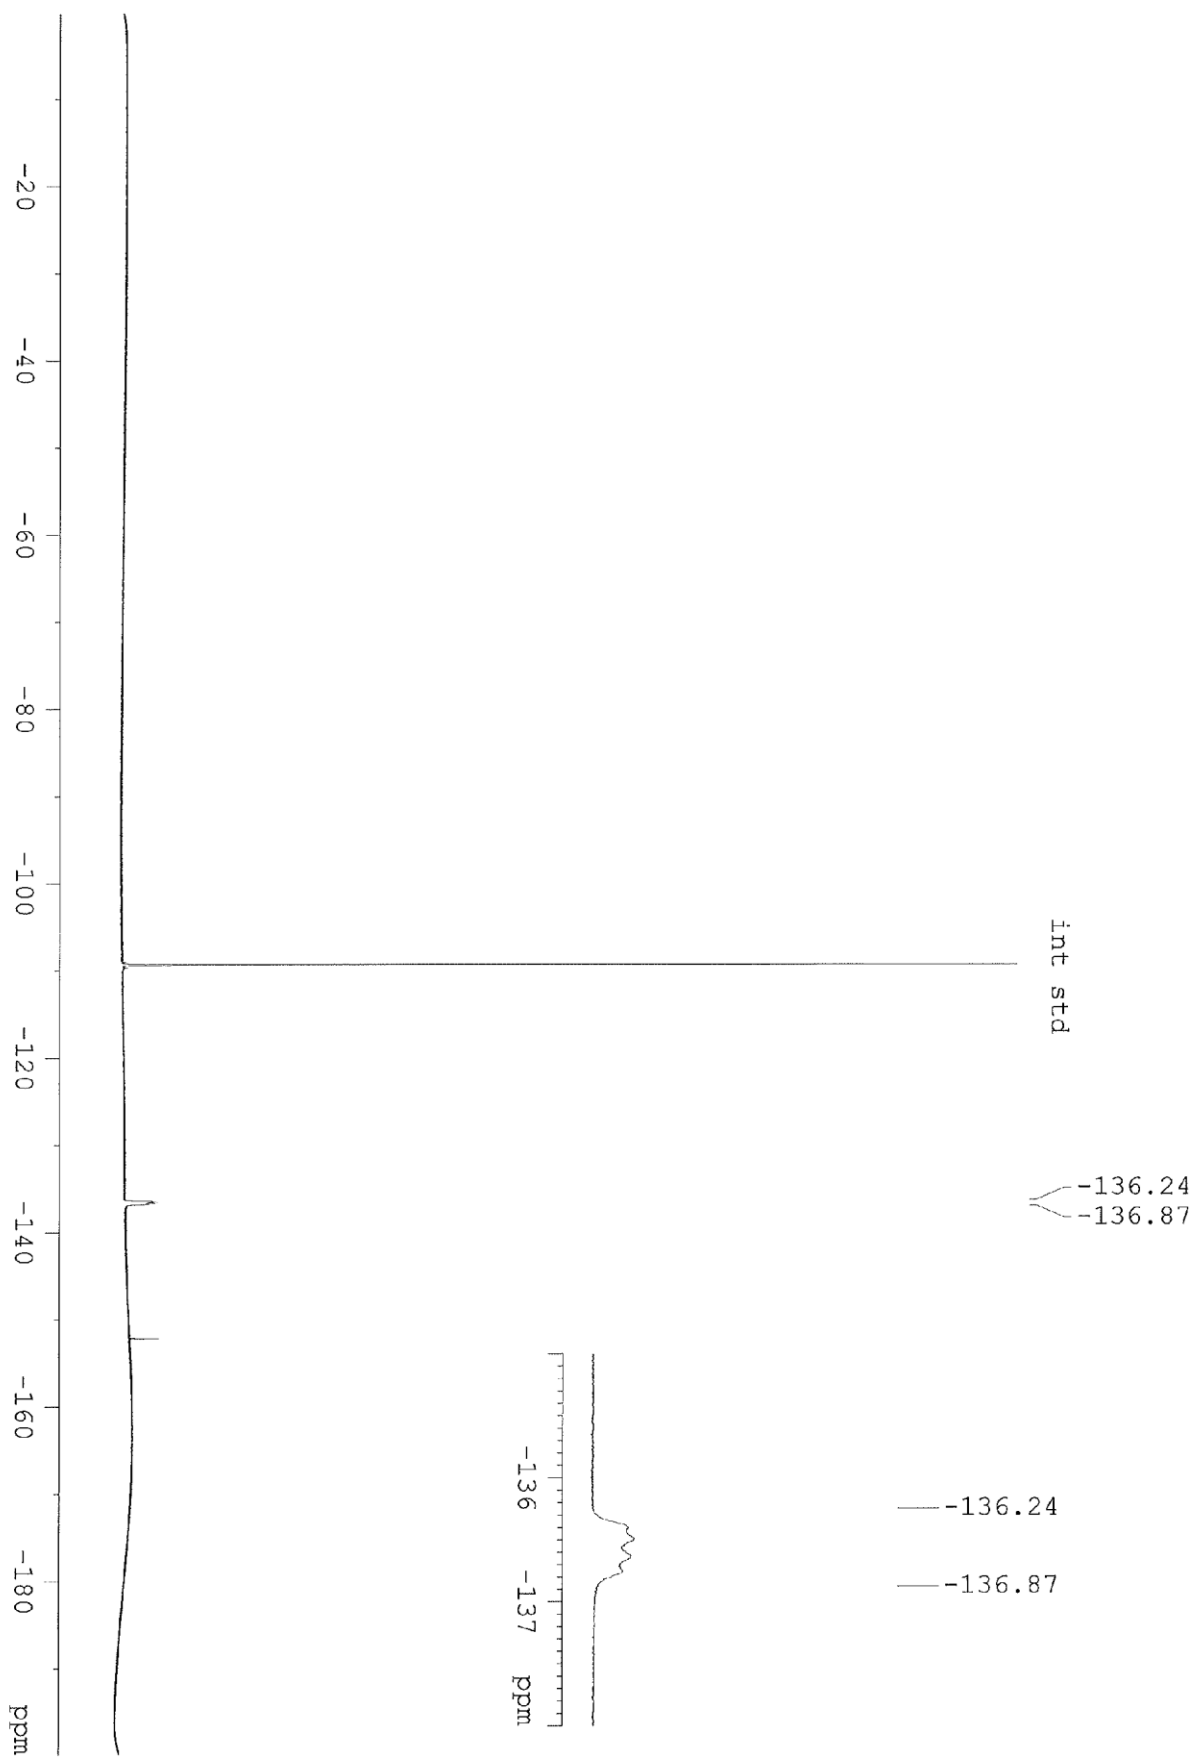

Compound 17 (11B NMR in MeCN-d<sub>3</sub>)

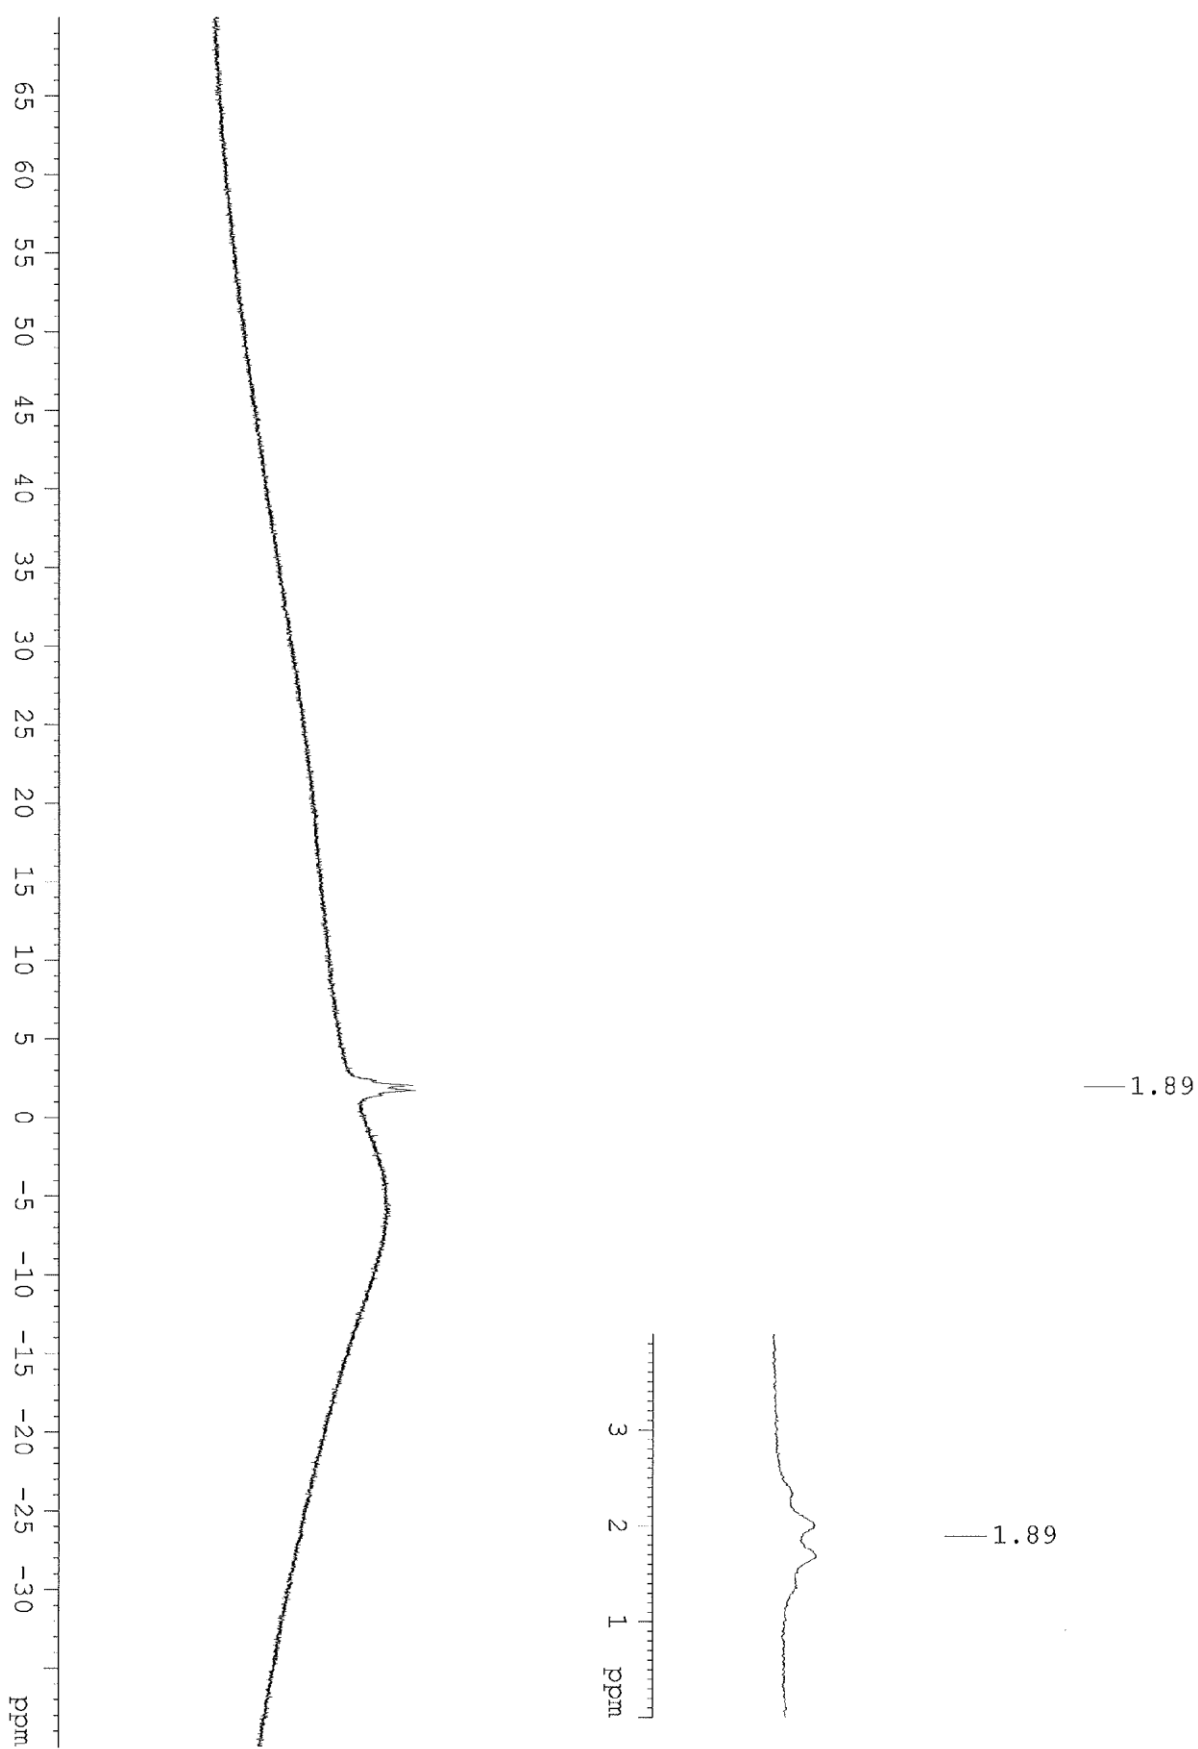

Compound 18 ( $^1\text{H}$  NMR in  $\text{MeCN-d}_3$ )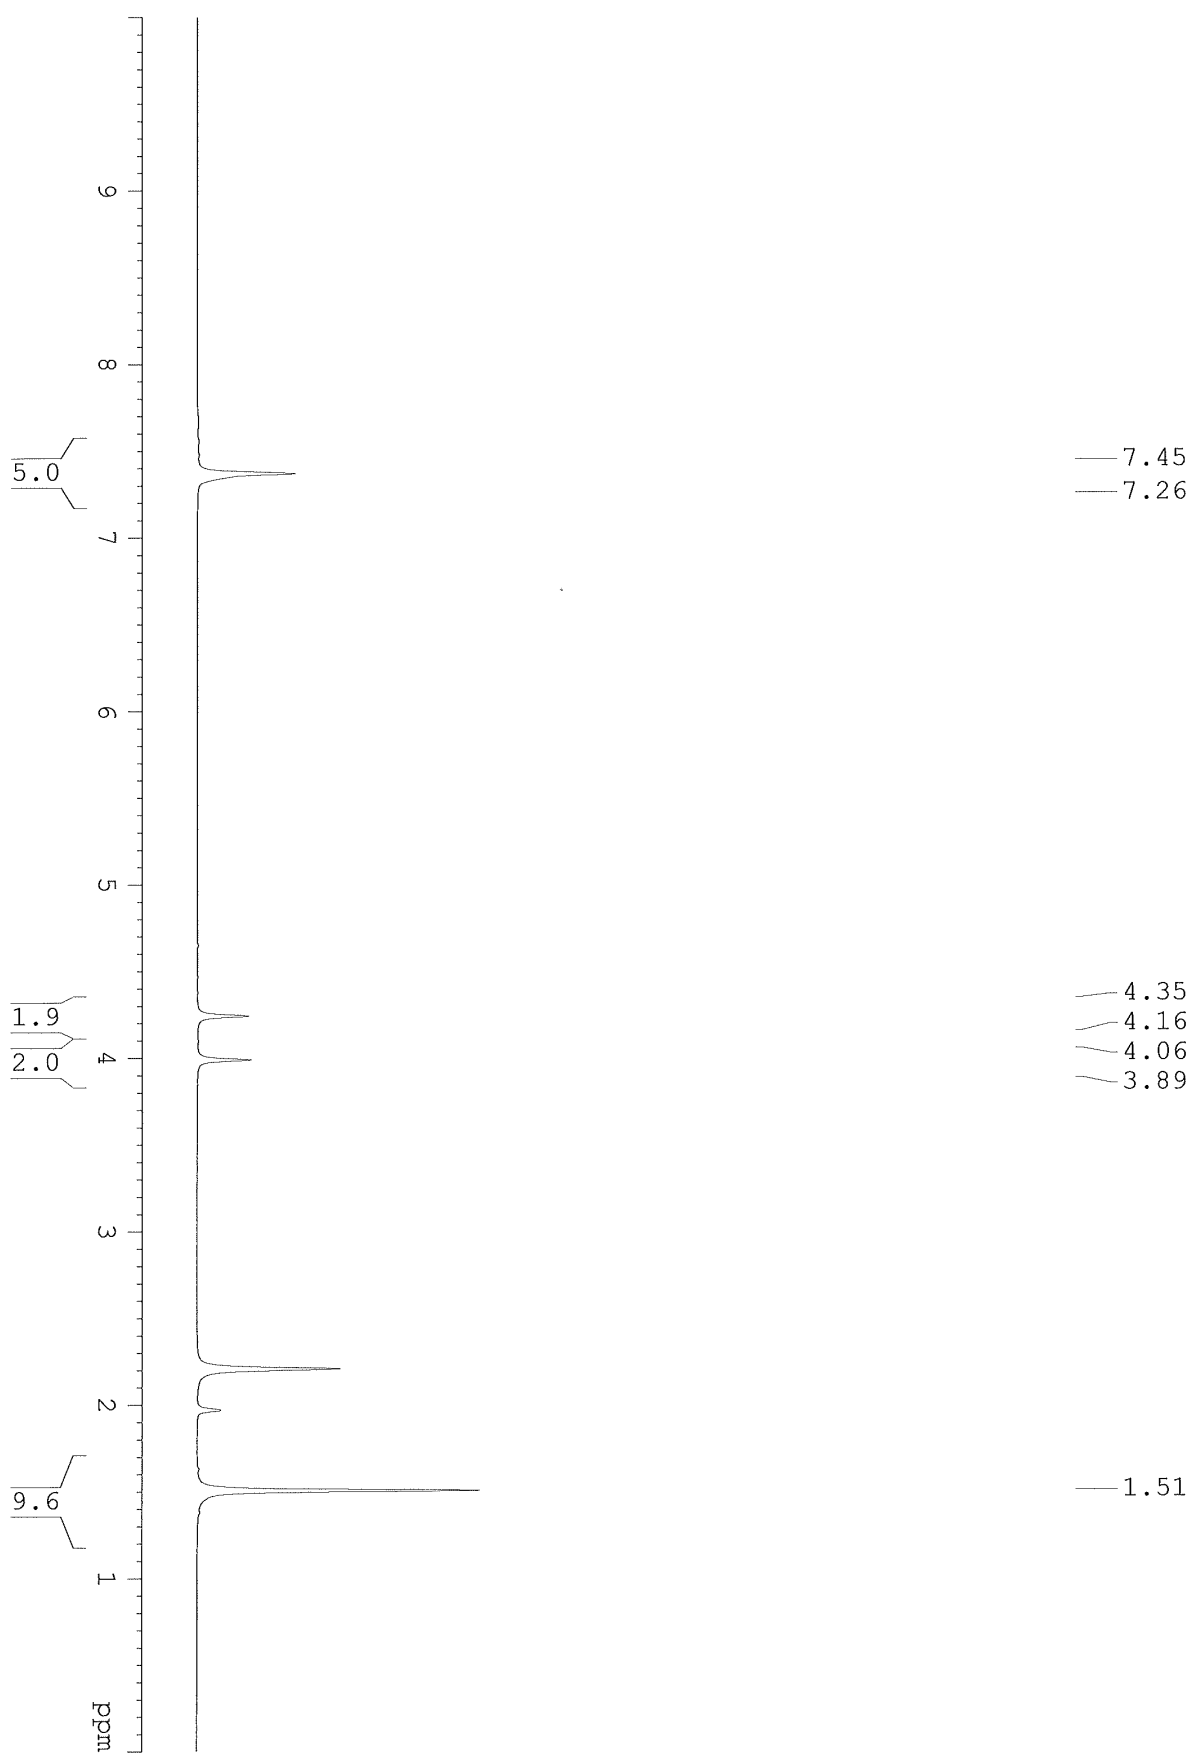

Compound 18 ( $^{13}\text{C}$  NMR in  $\text{MeCN-d}_3$ )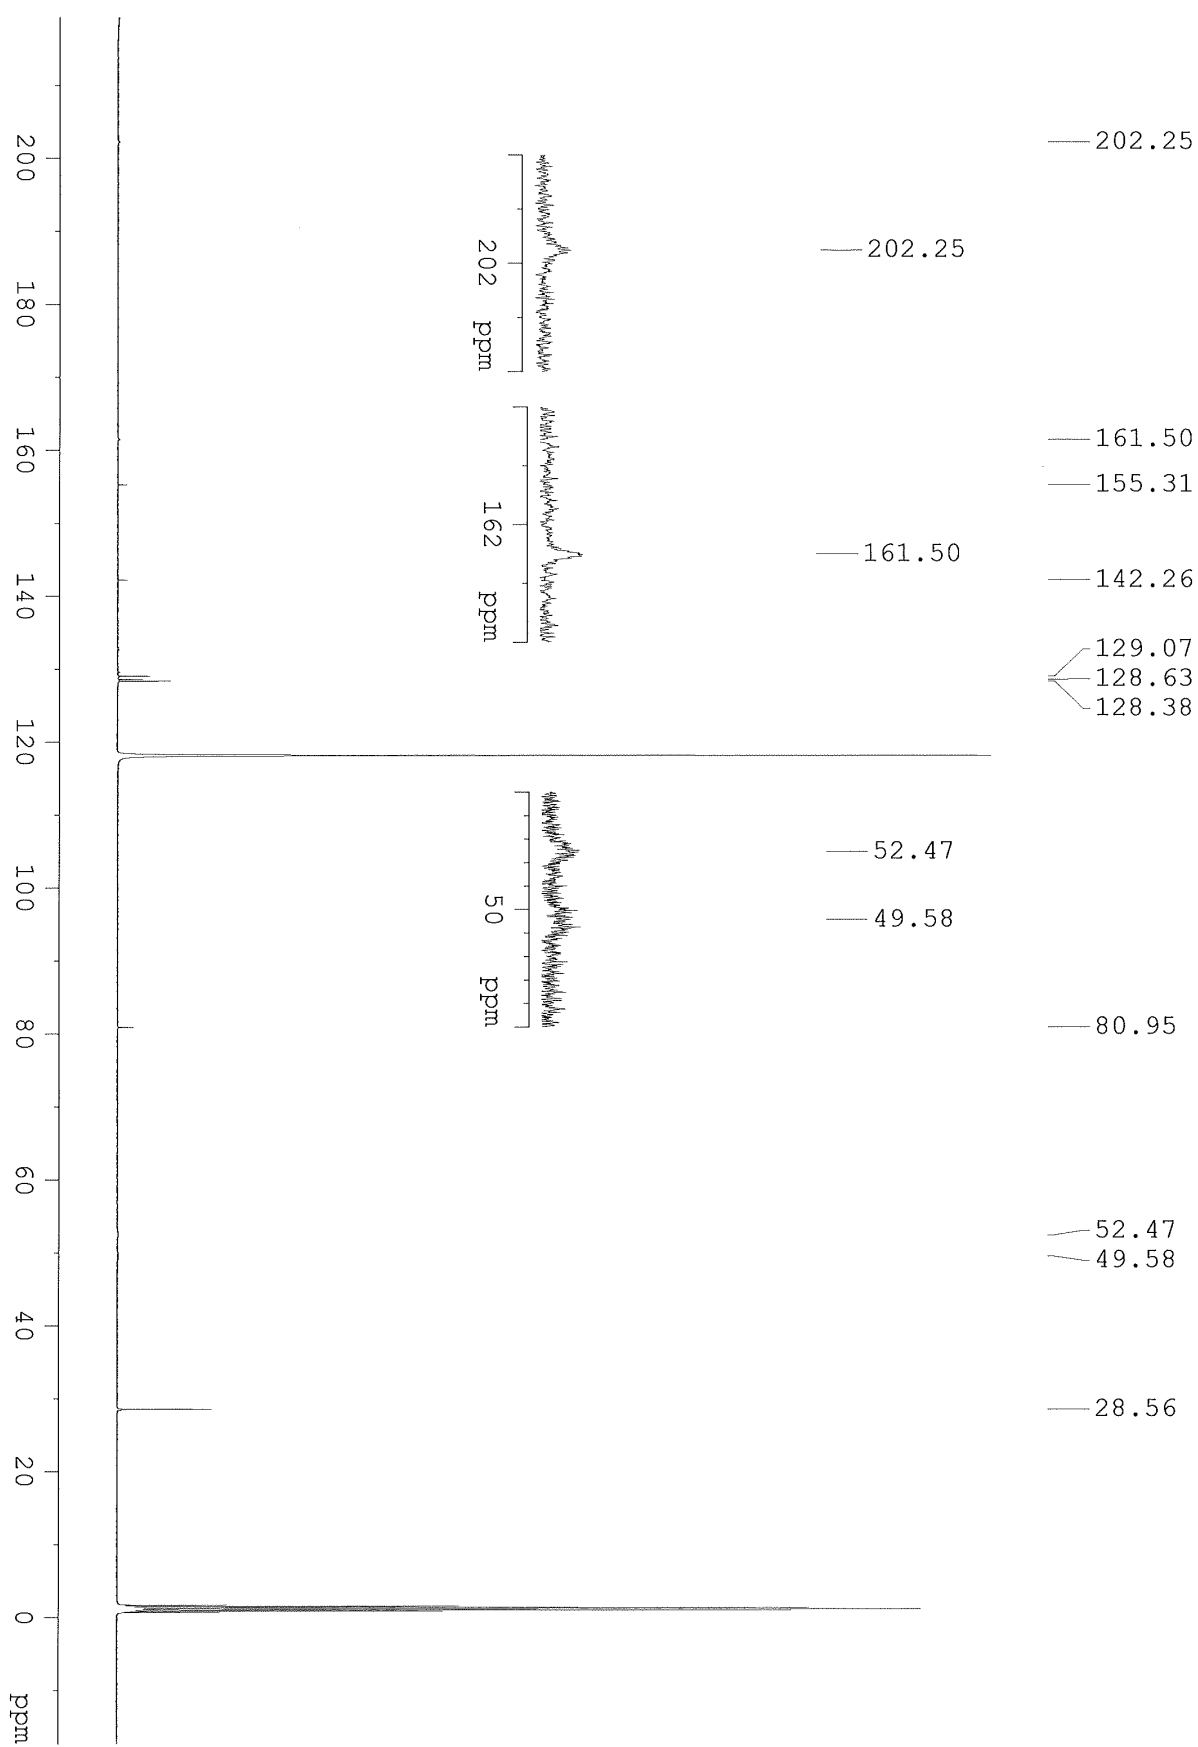



Compound 18 ( $^{19}\text{F}$  NMR in  $\text{DMSO-d}_6$ )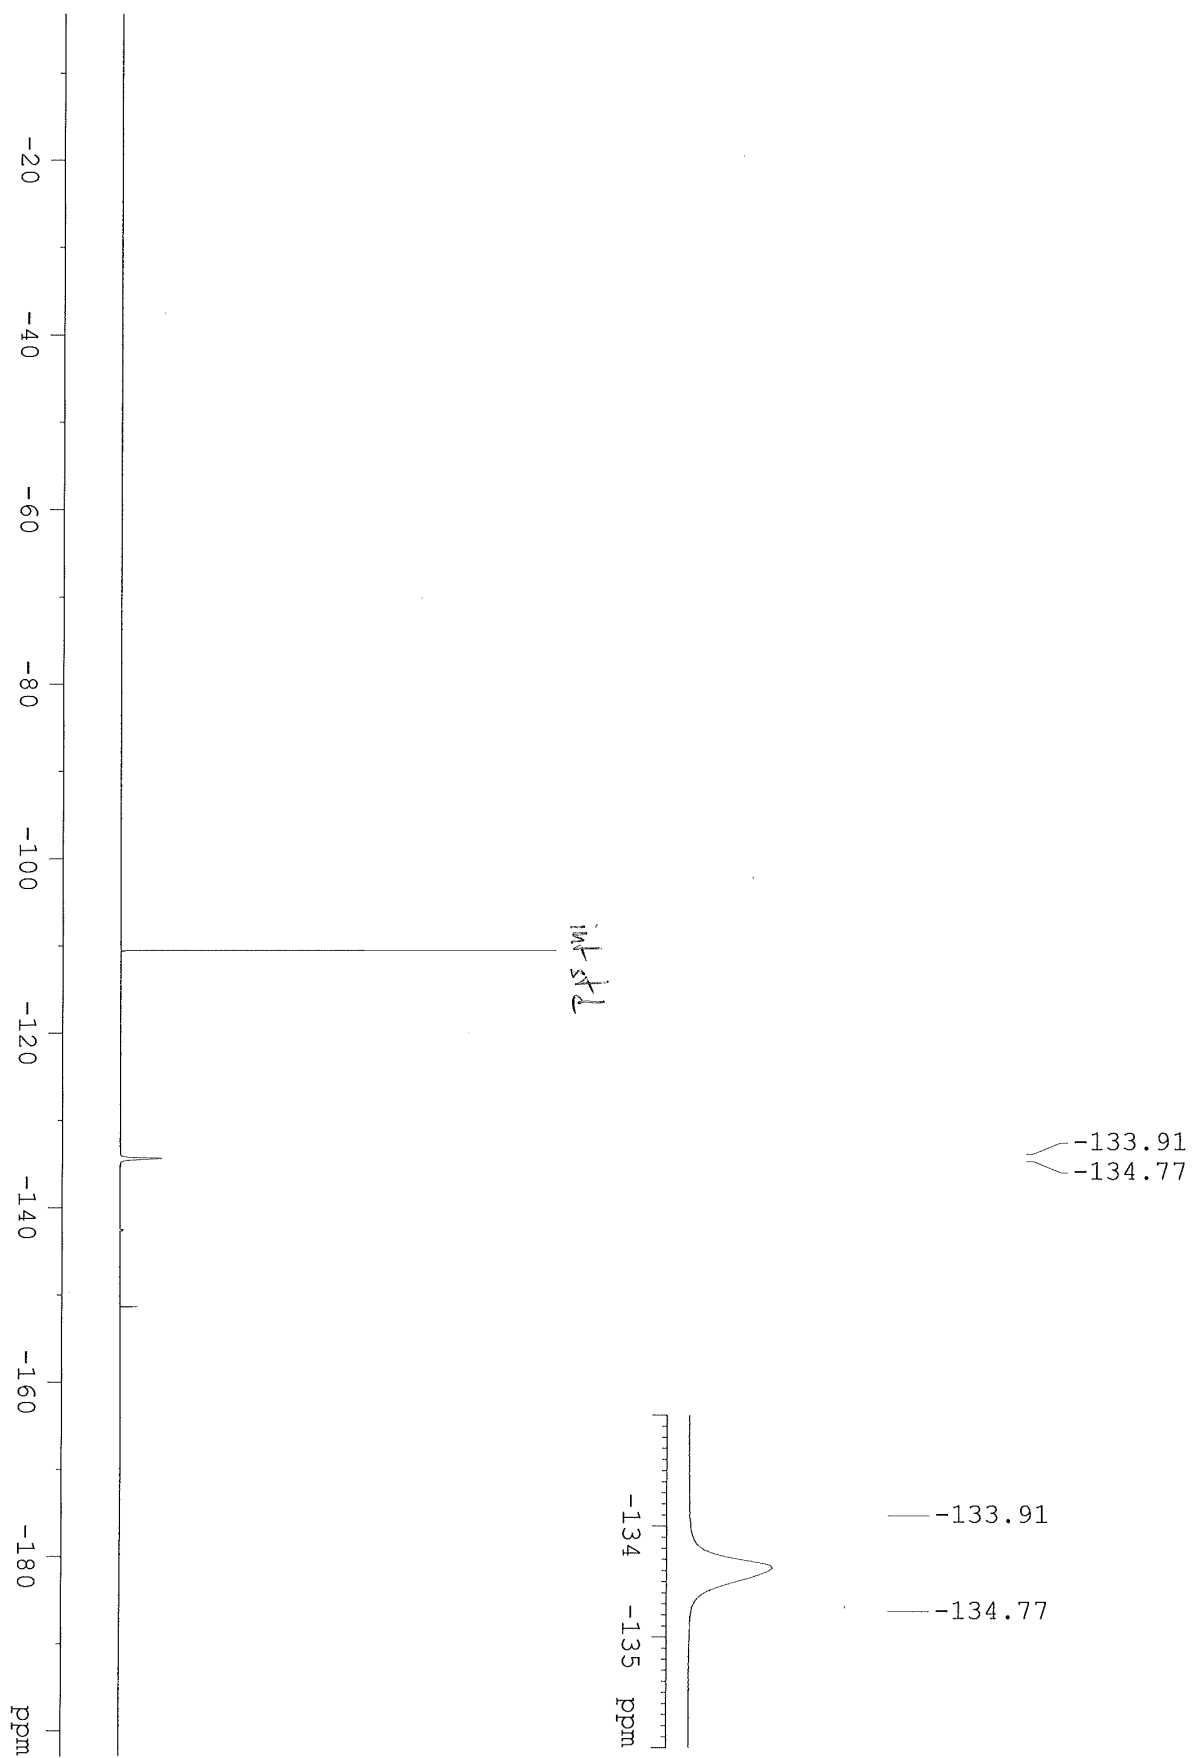

Compound 18 (11B NMR in MeCN-d<sub>3</sub>)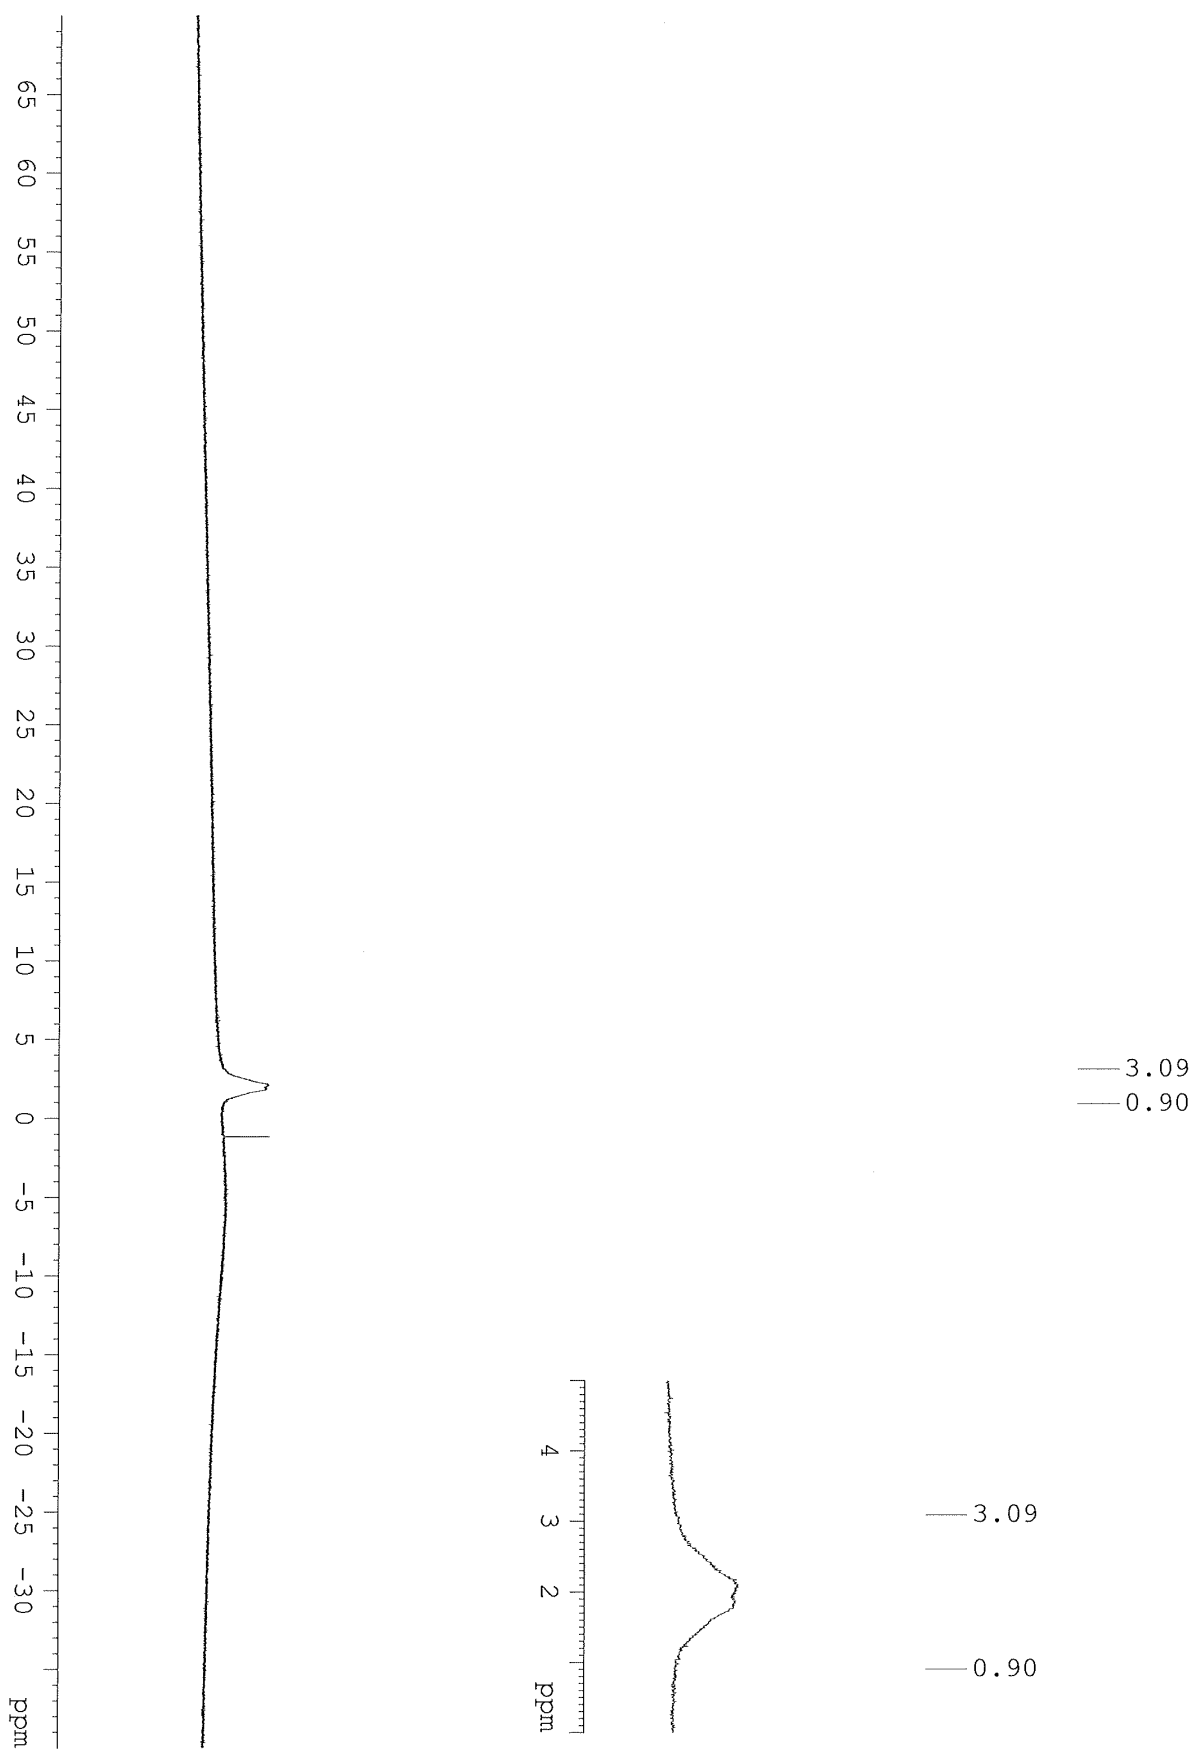

Compound 19 (1H NMR in MeCN-d<sub>3</sub>)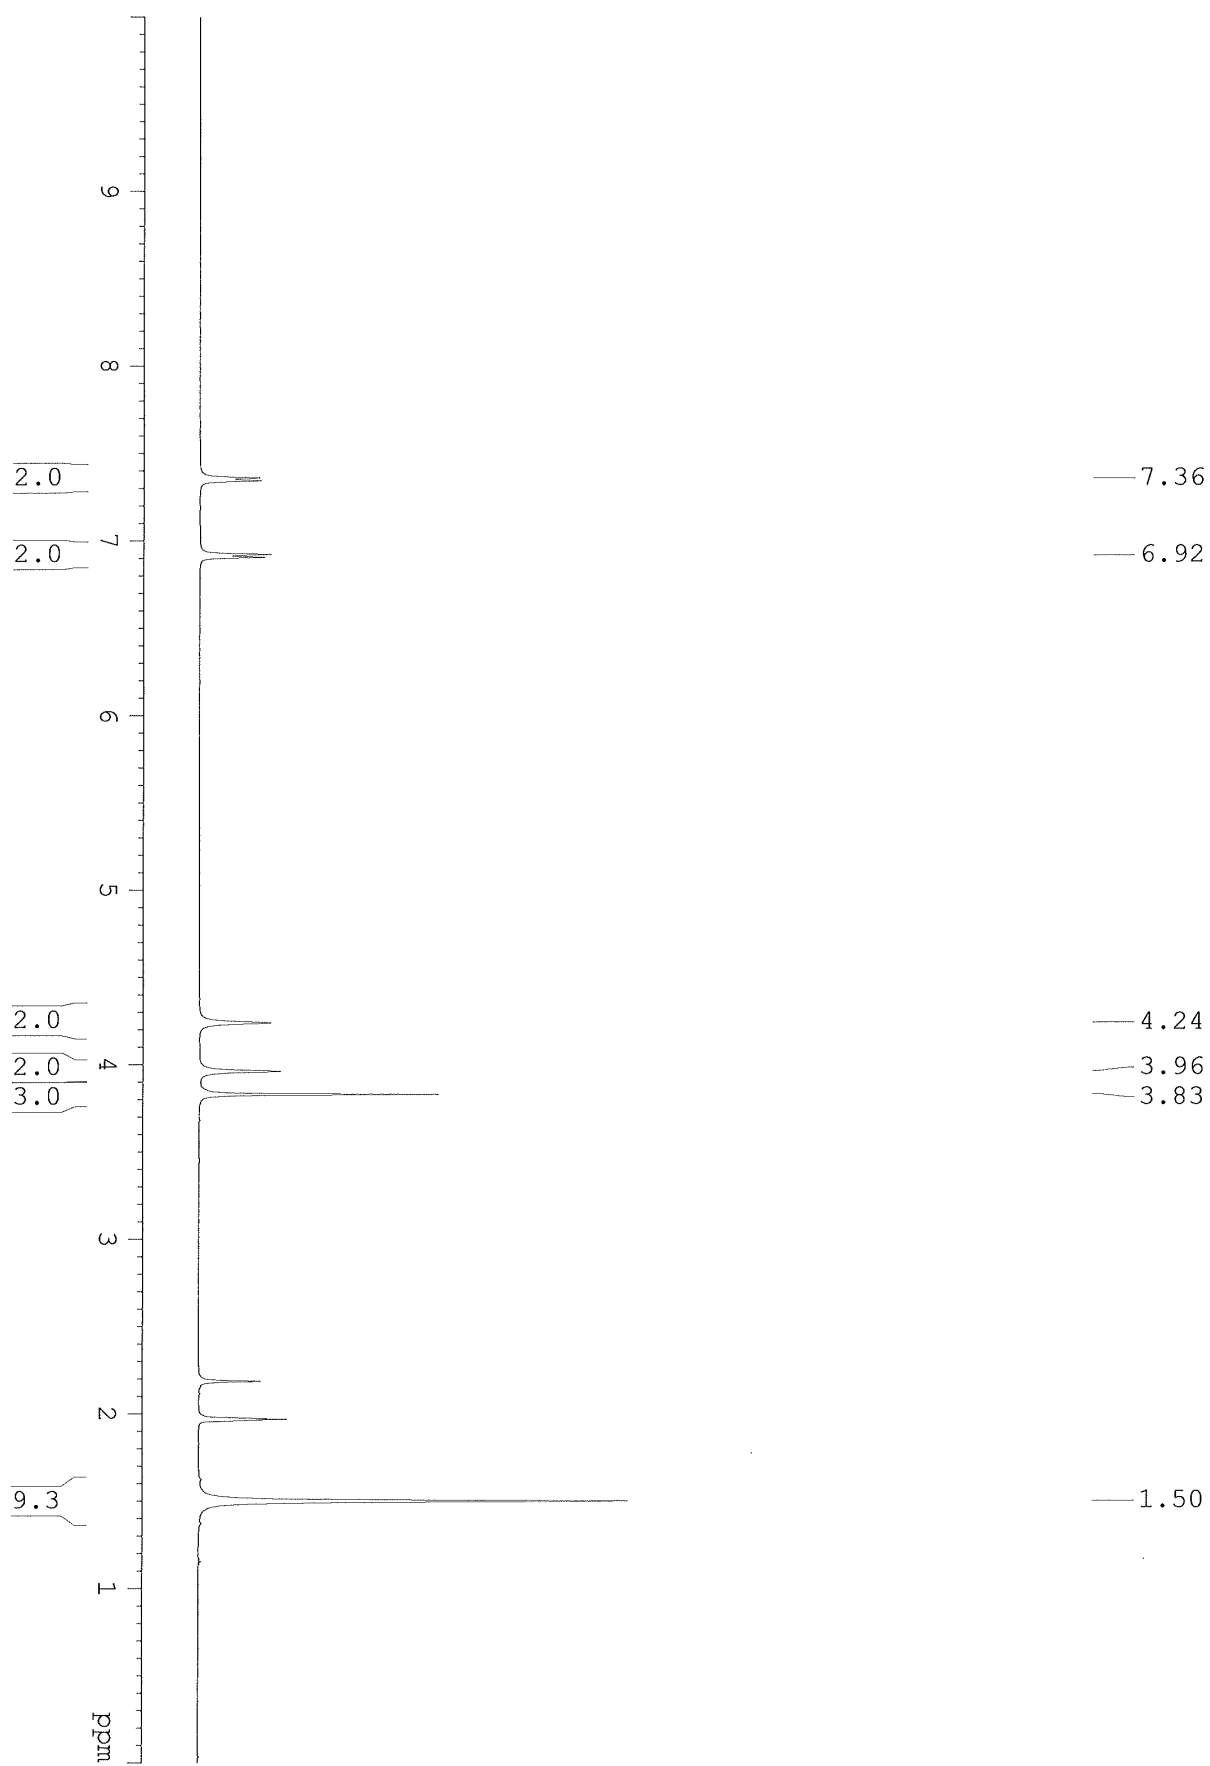

Compound 19 ( $^{13}\text{C}$  NMR in  $\text{MeCN-d}_3$ )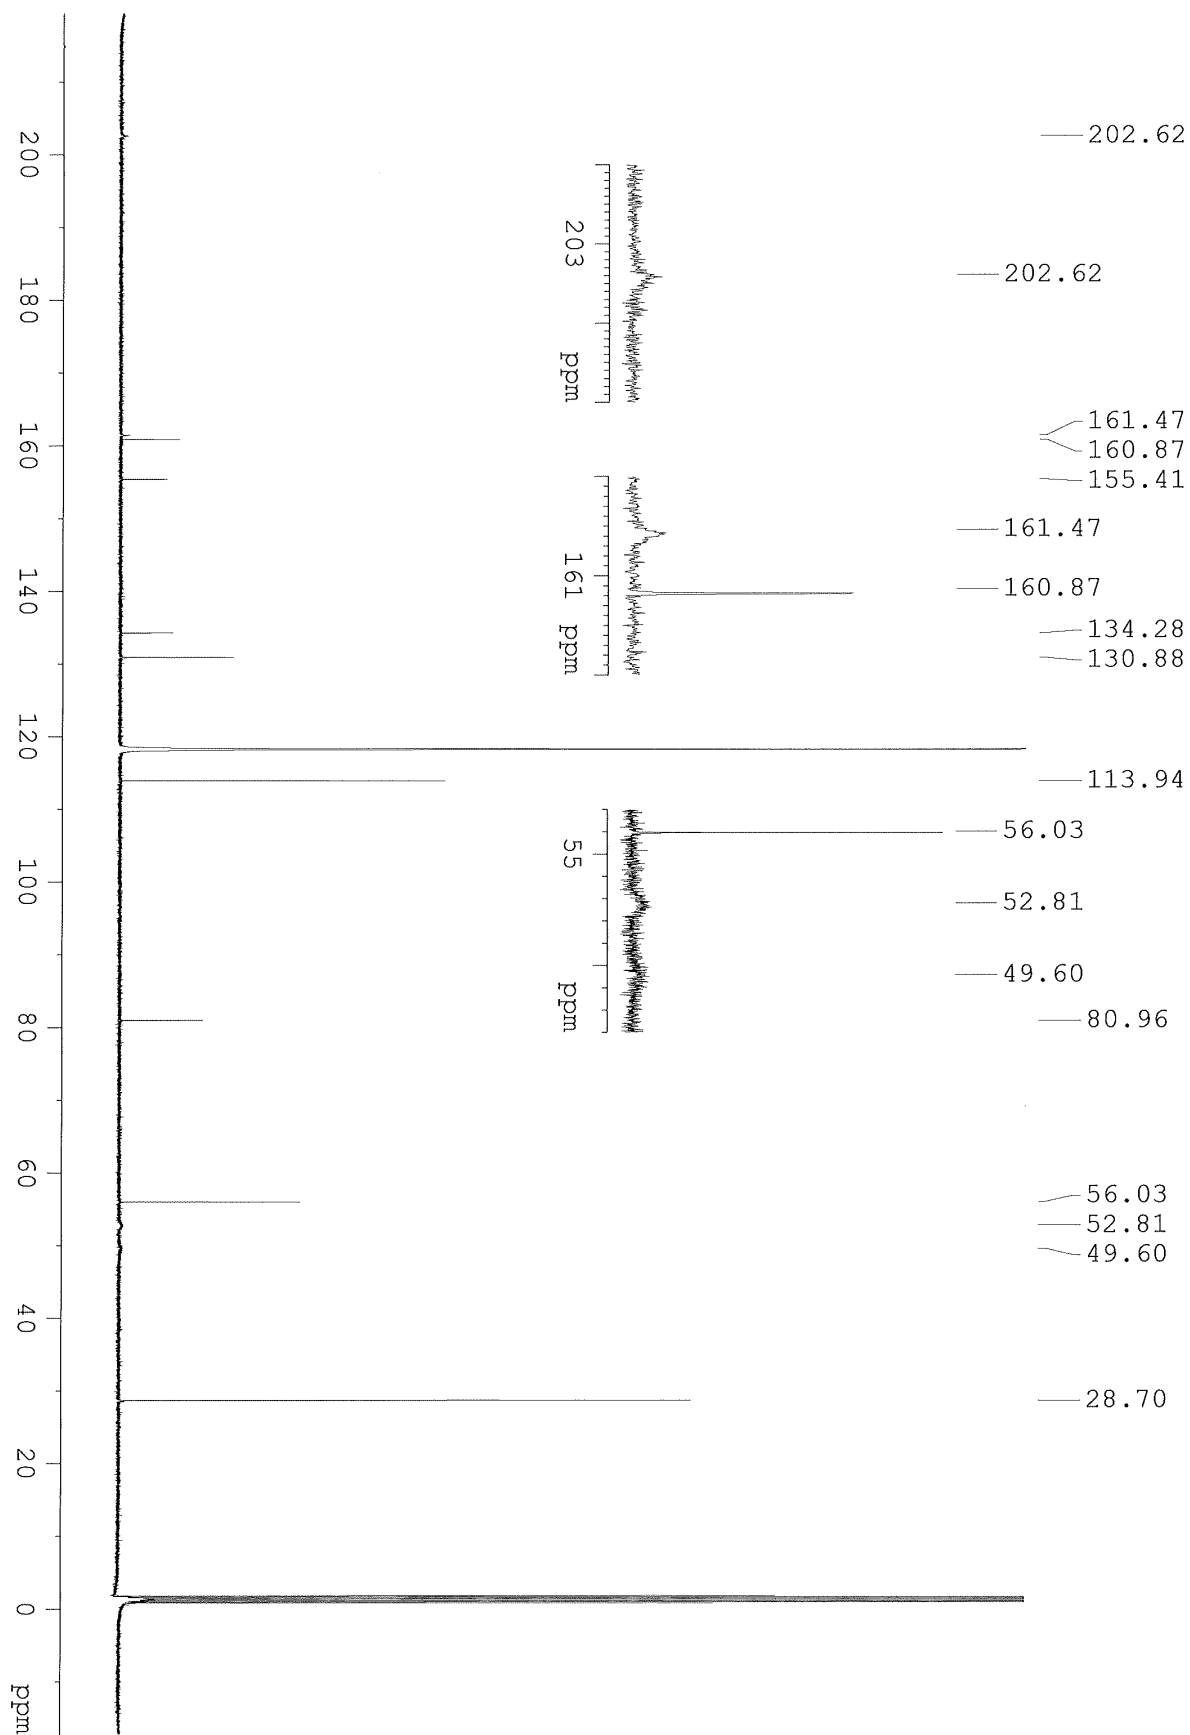

Compound 19 (19F NMR in MeCN-d3)

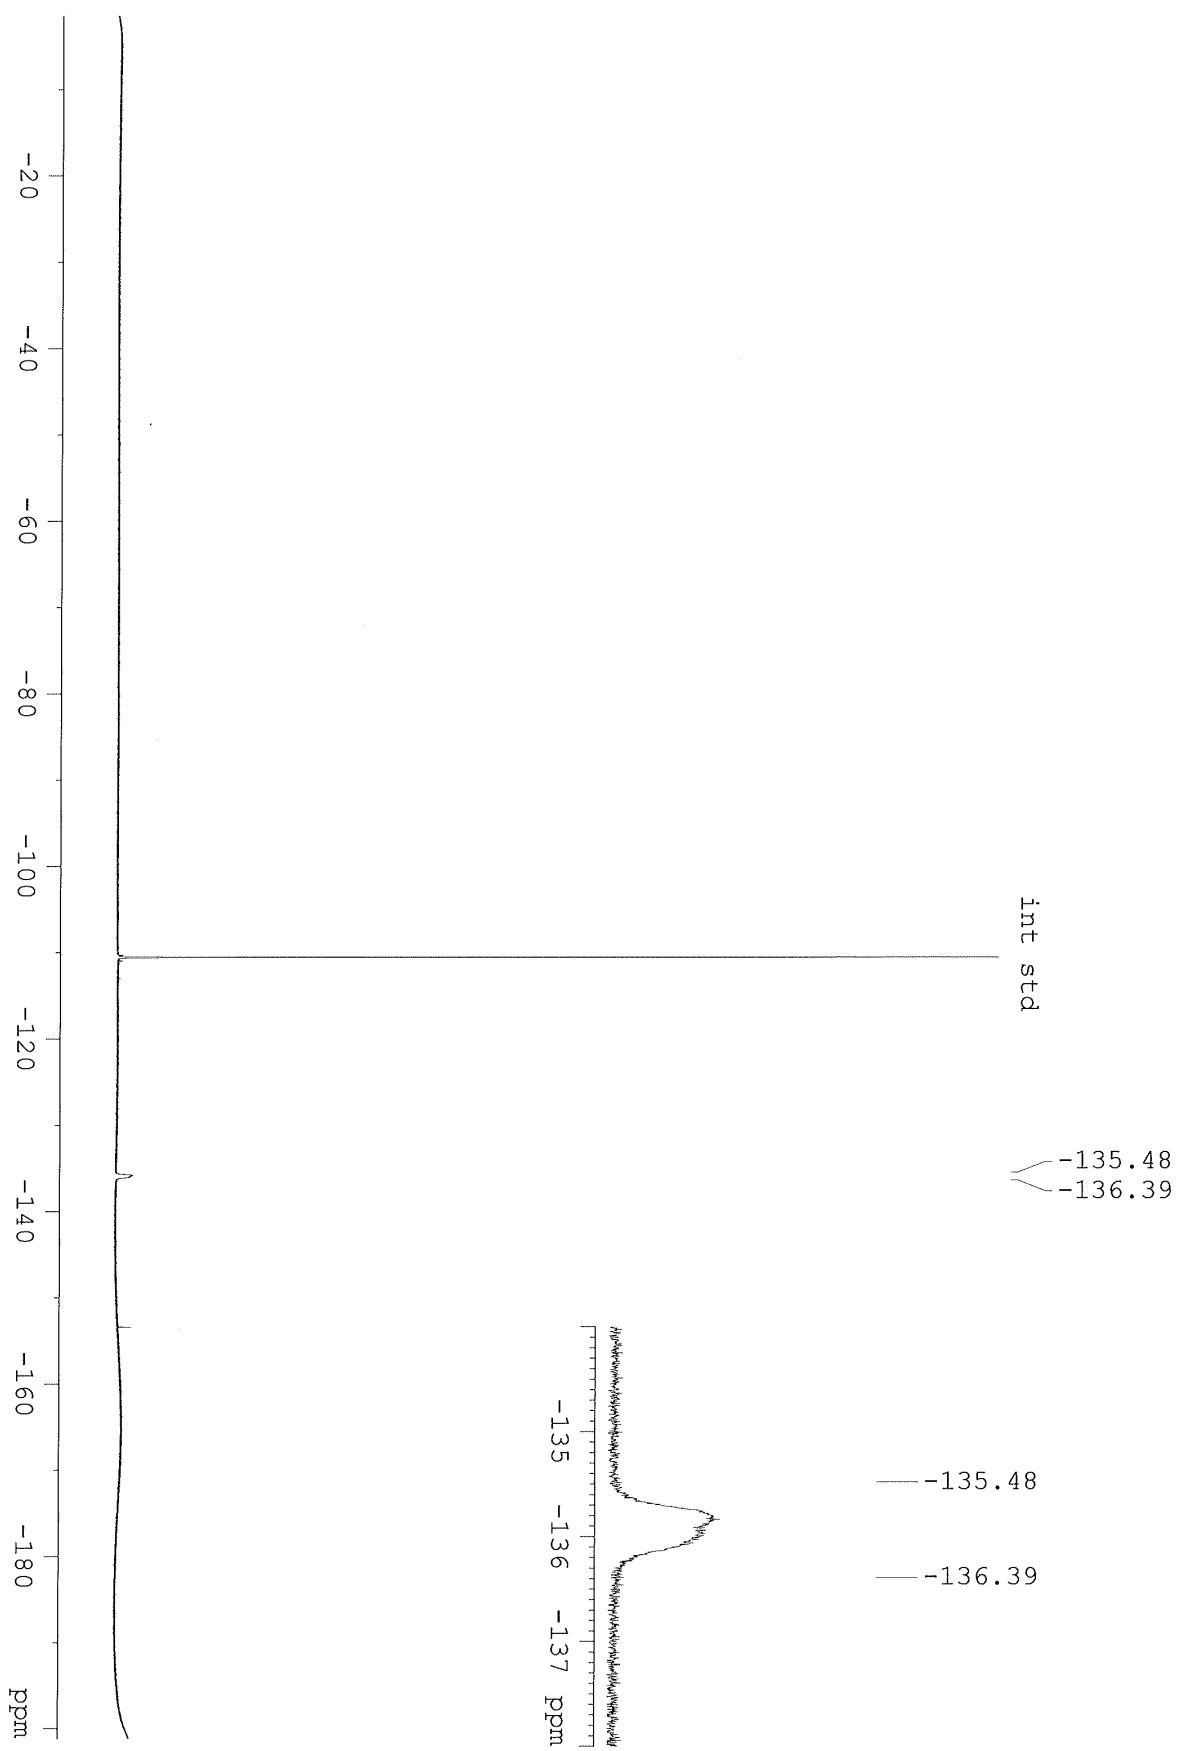

Compound 19 (11B NMR in MeCN-d<sub>3</sub>)

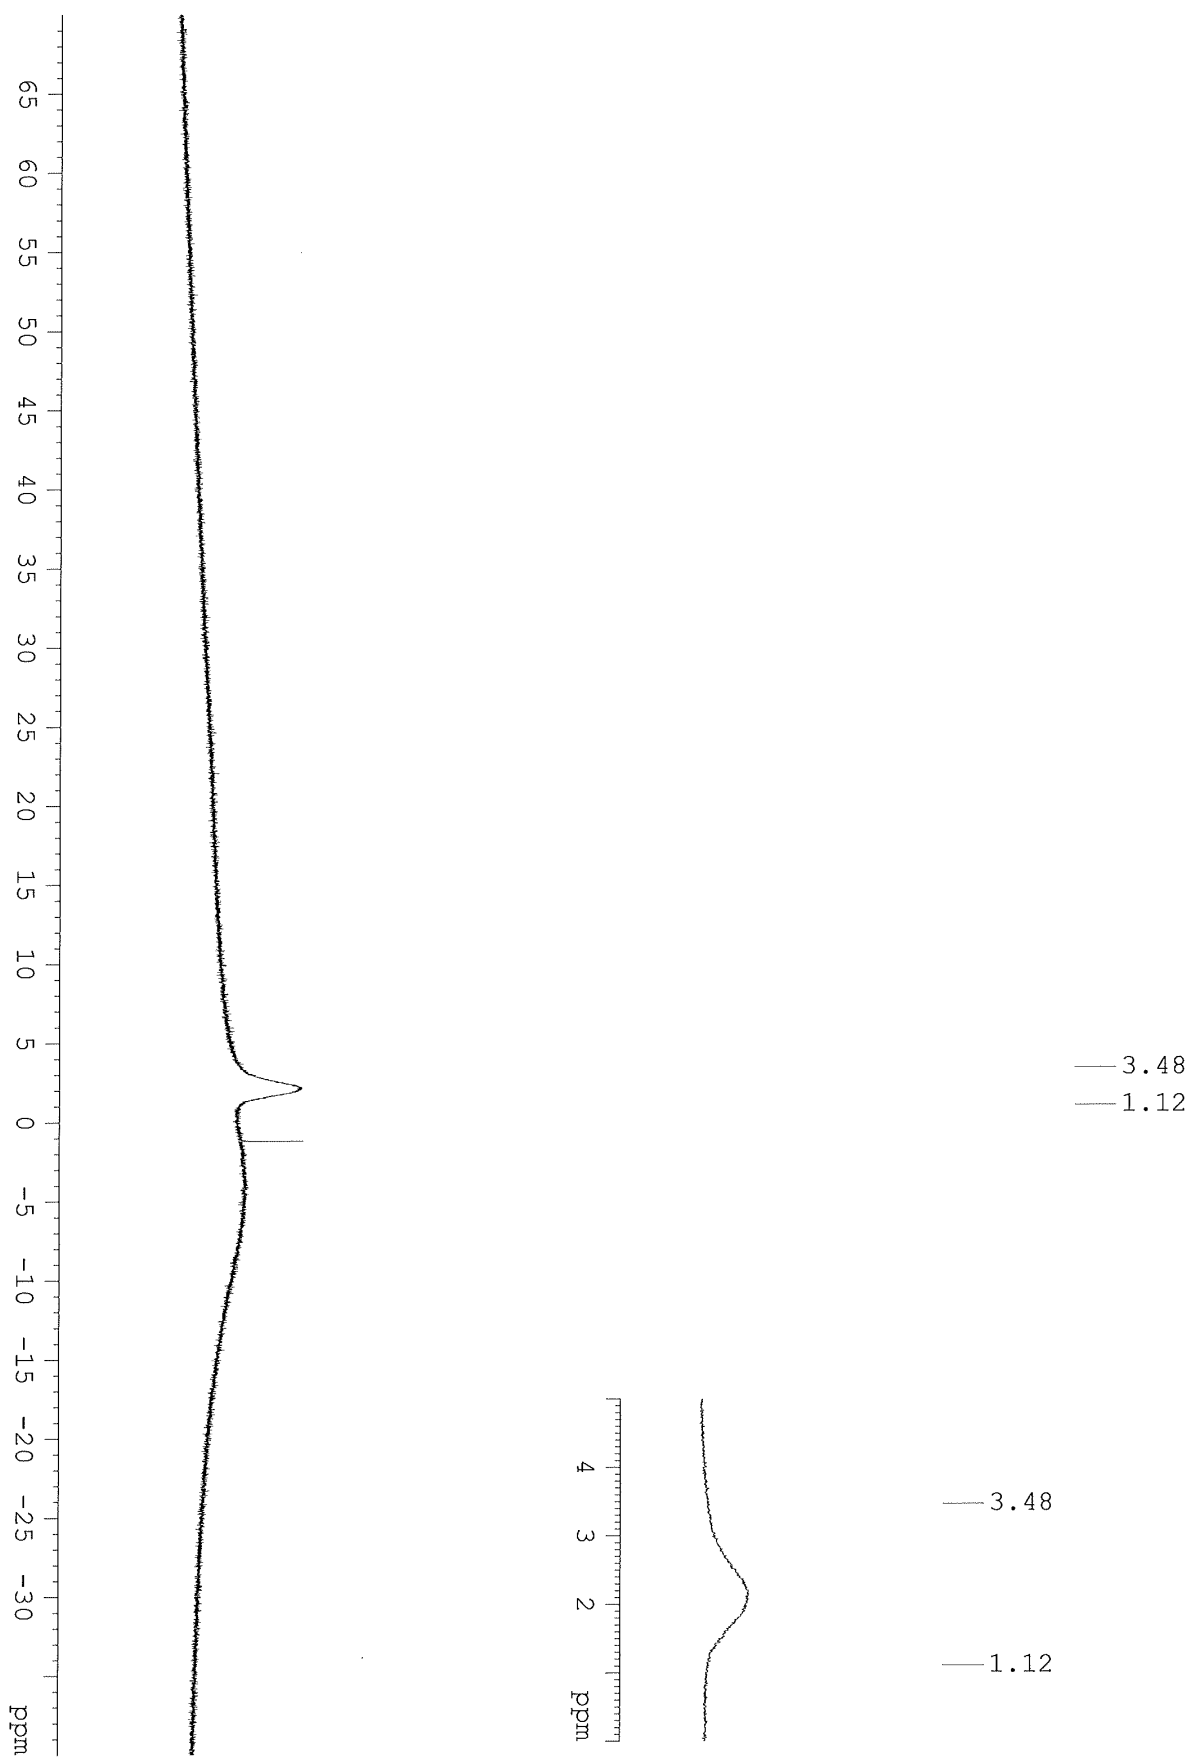

Compound 20 ( $^1\text{H}$  NMR in  $\text{MeCN-}d_3$ )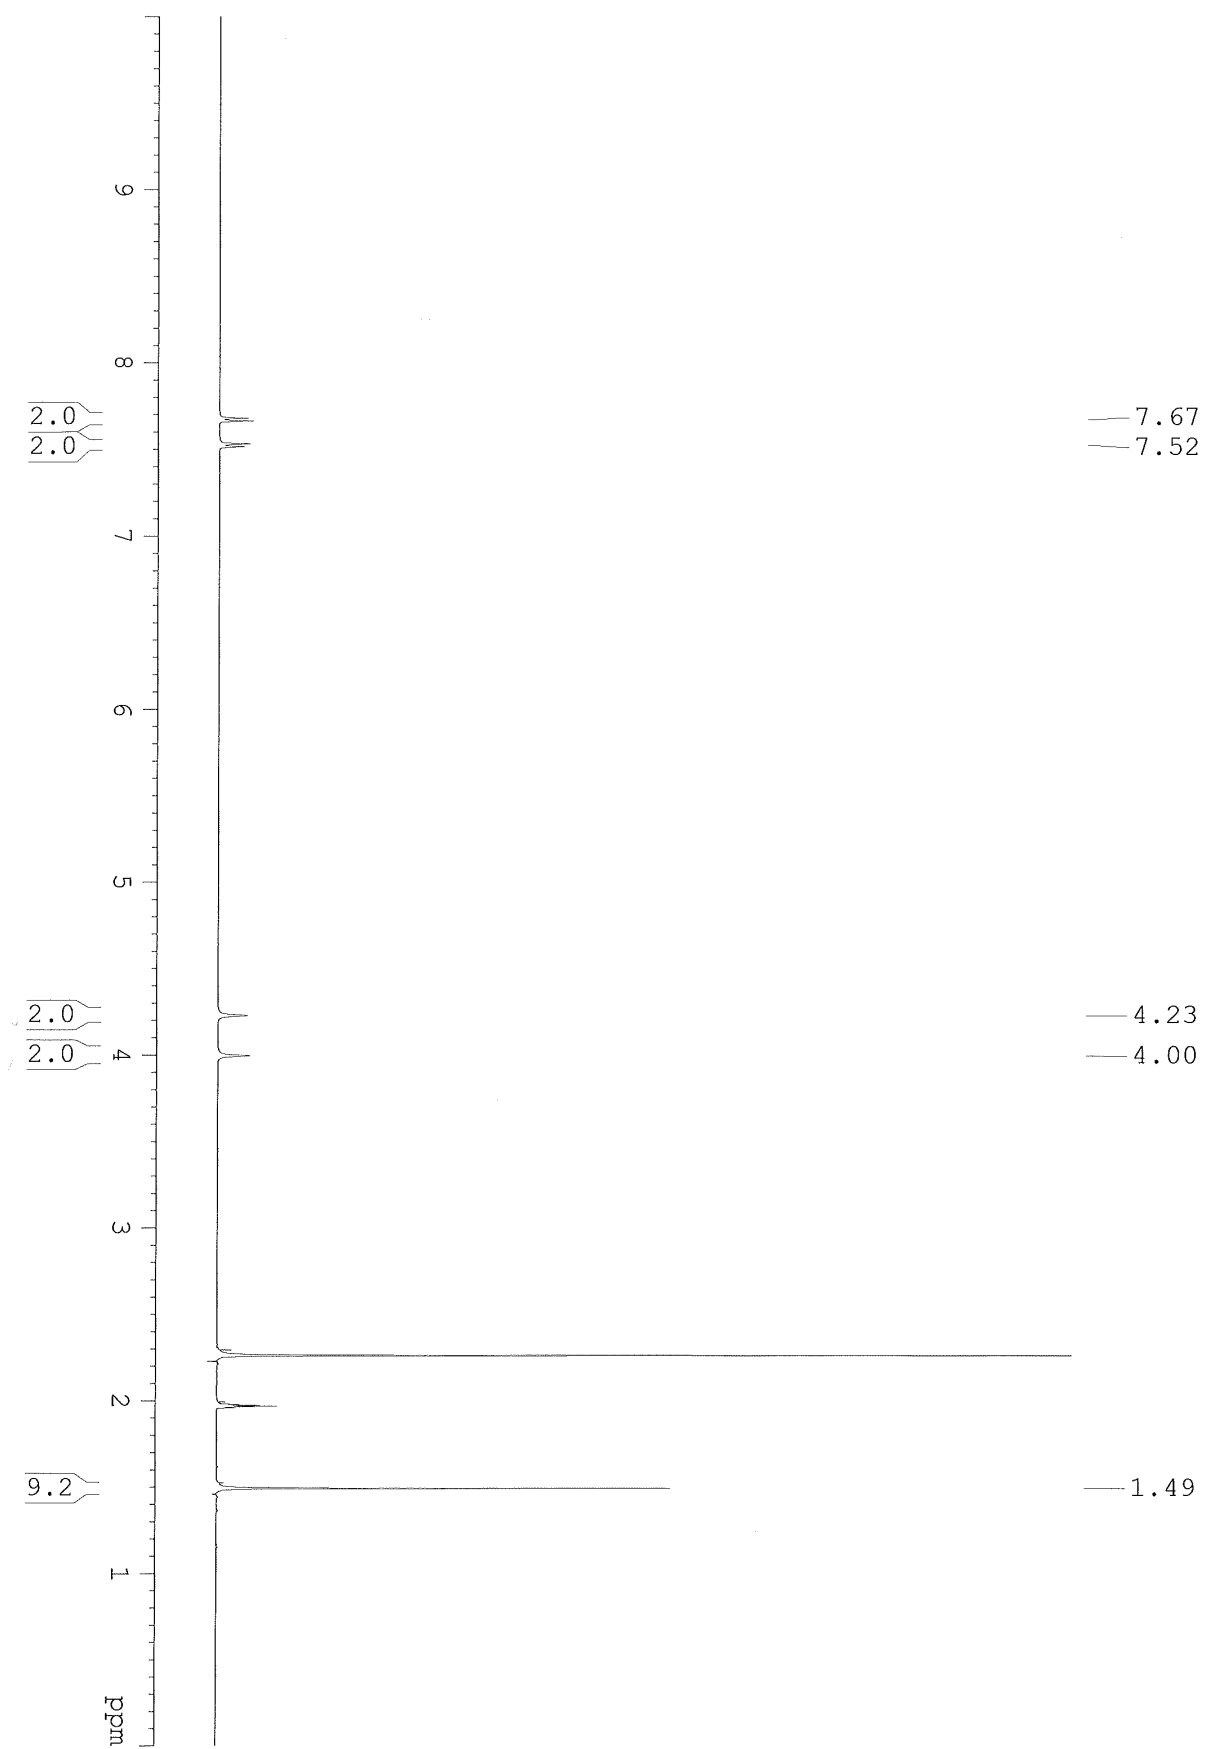

Compound ~~19~~<sup>20</sup> (<sup>13</sup>C NMR (CPD) in MeCN-d<sub>3</sub>)

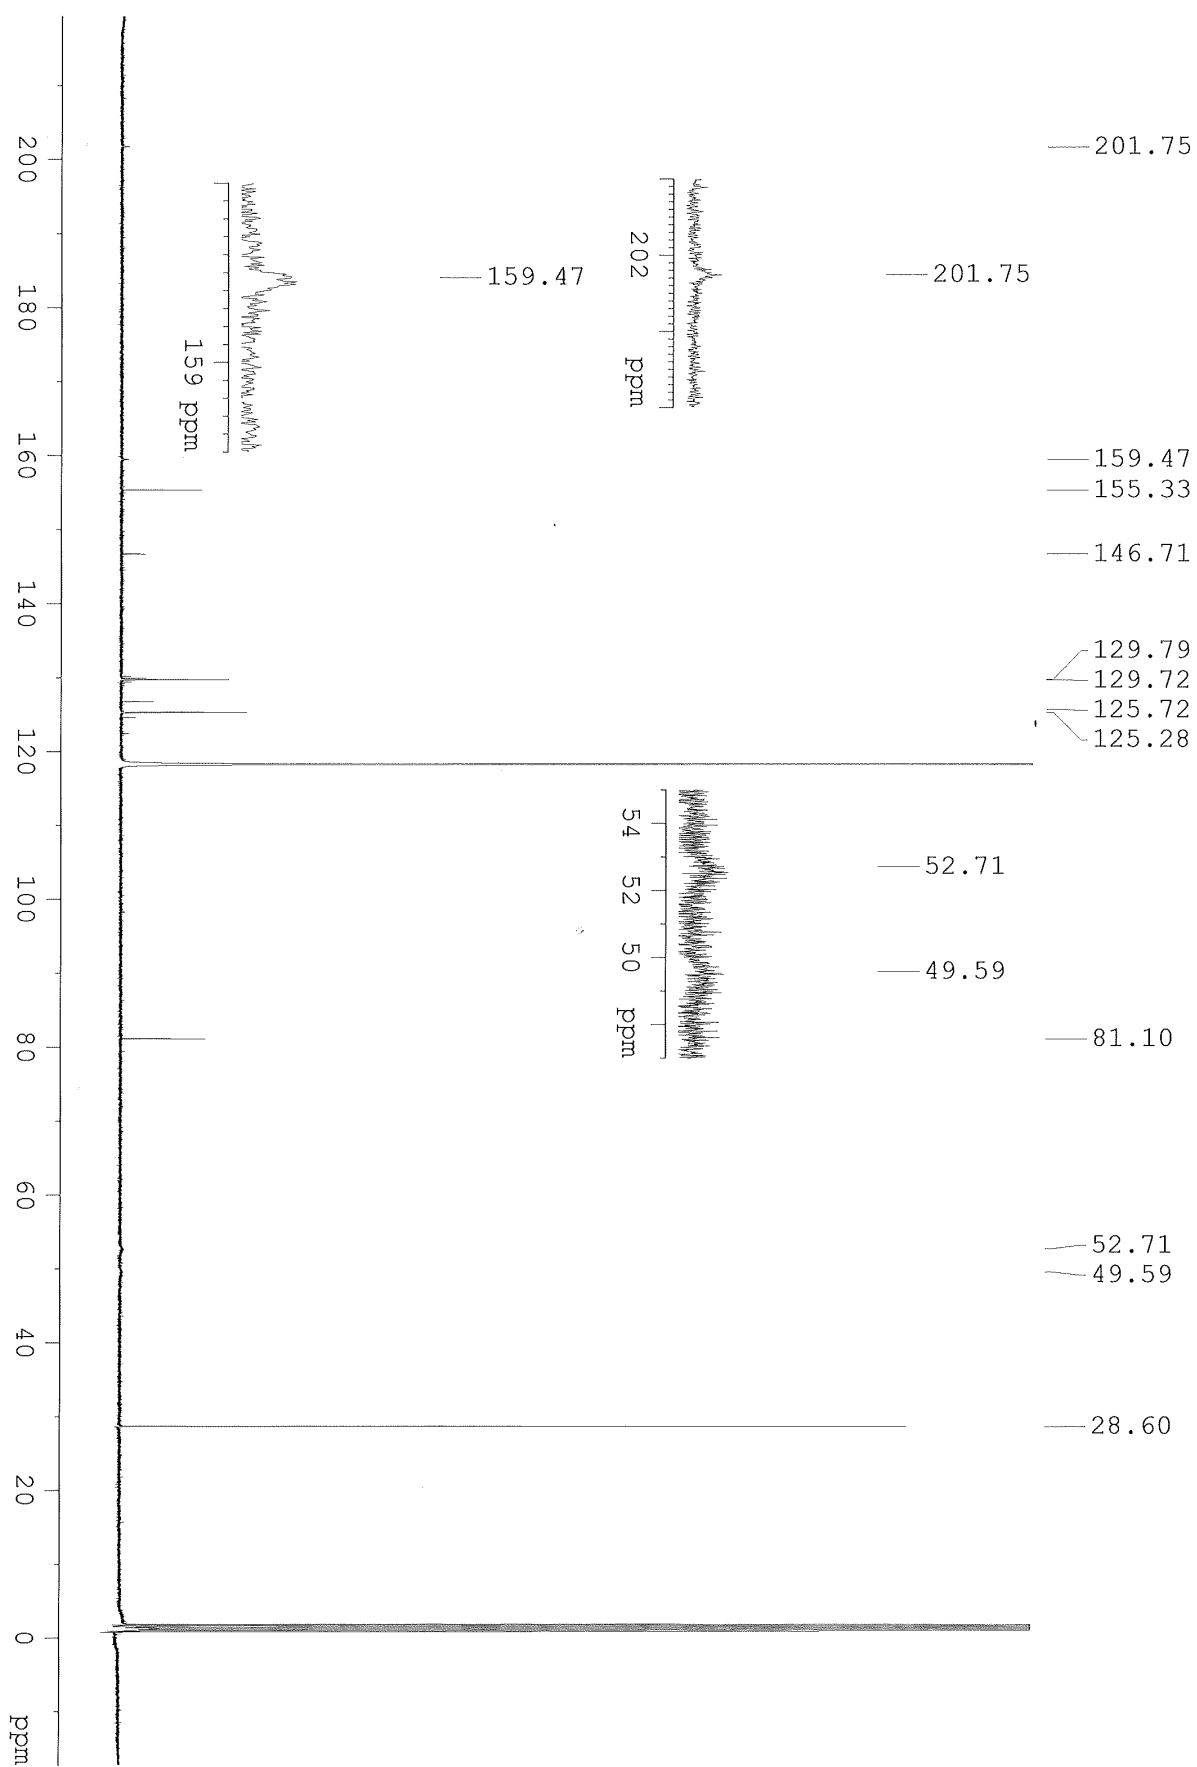



Compound 20 ( $^{13}\text{C}$  NMR (APT) in  $\text{MeCN-}d_3$ )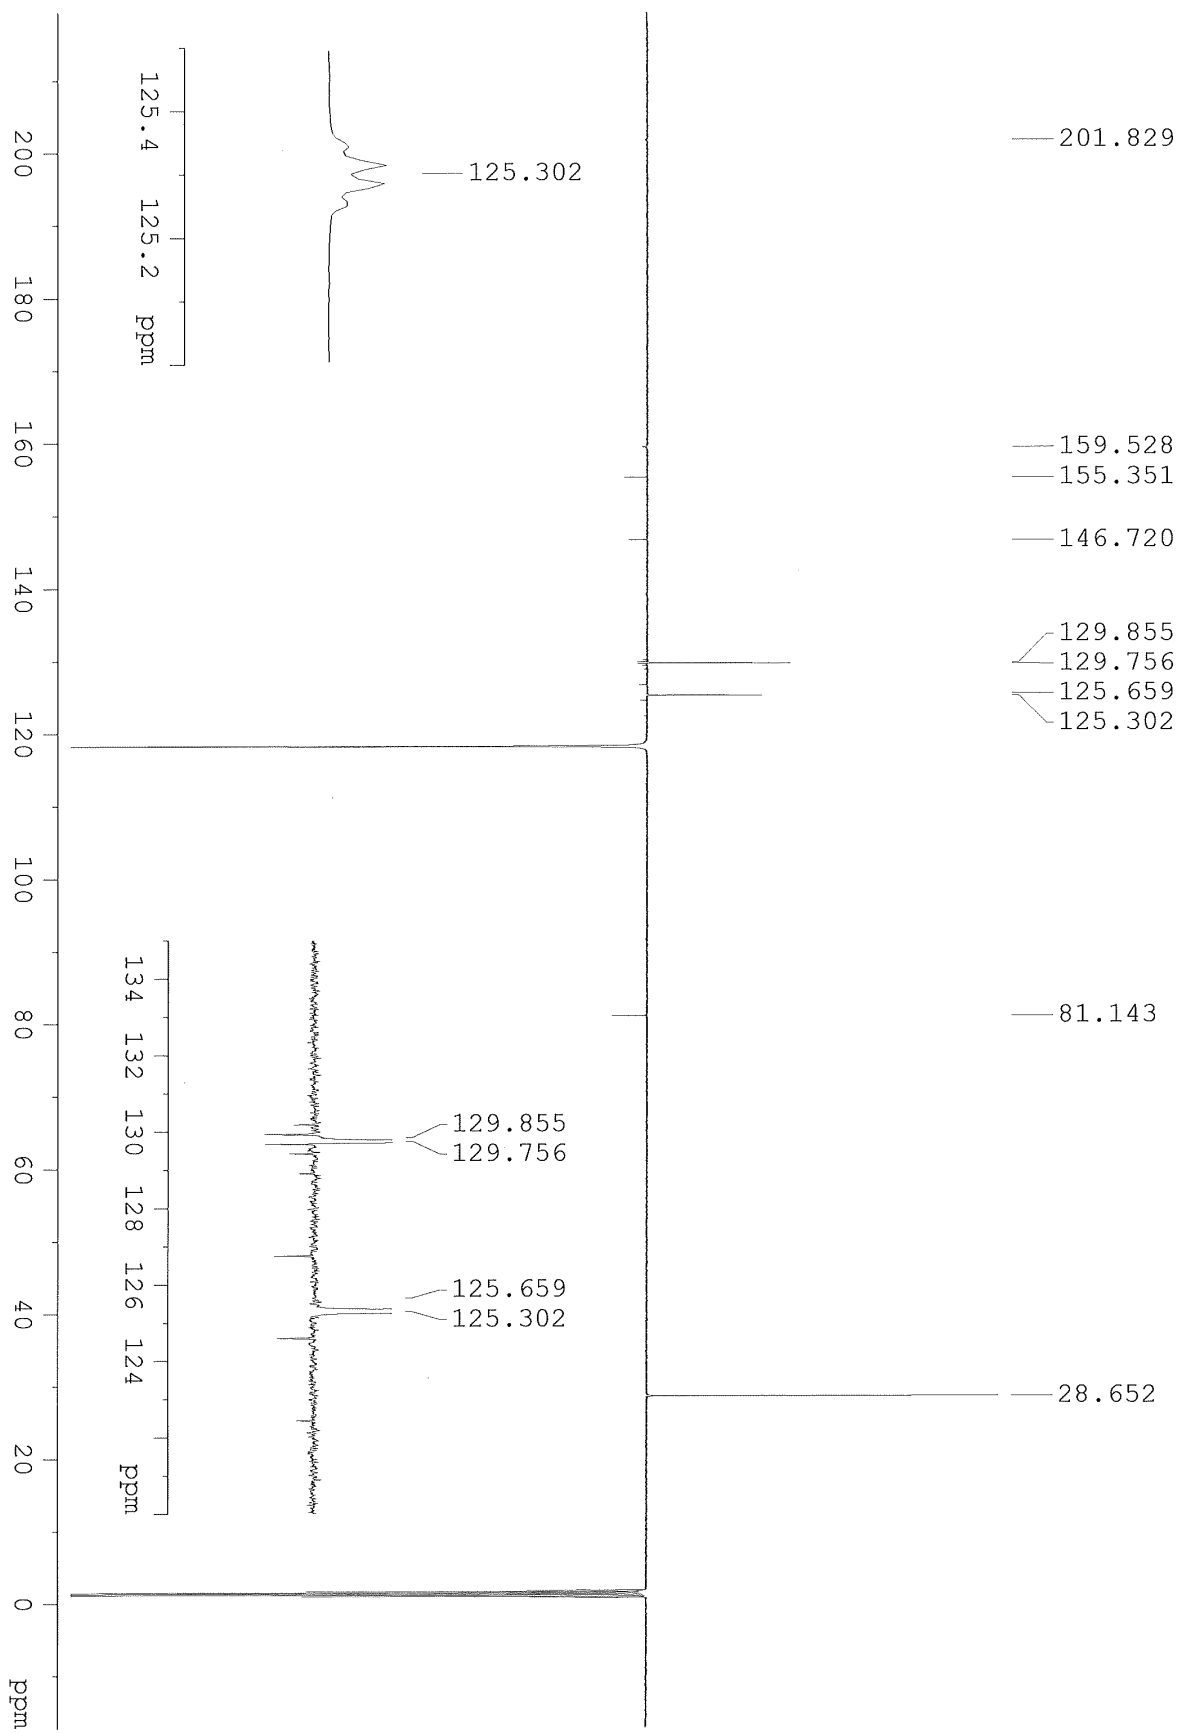

Compound 20 (19F NMR in MeCN-d3)

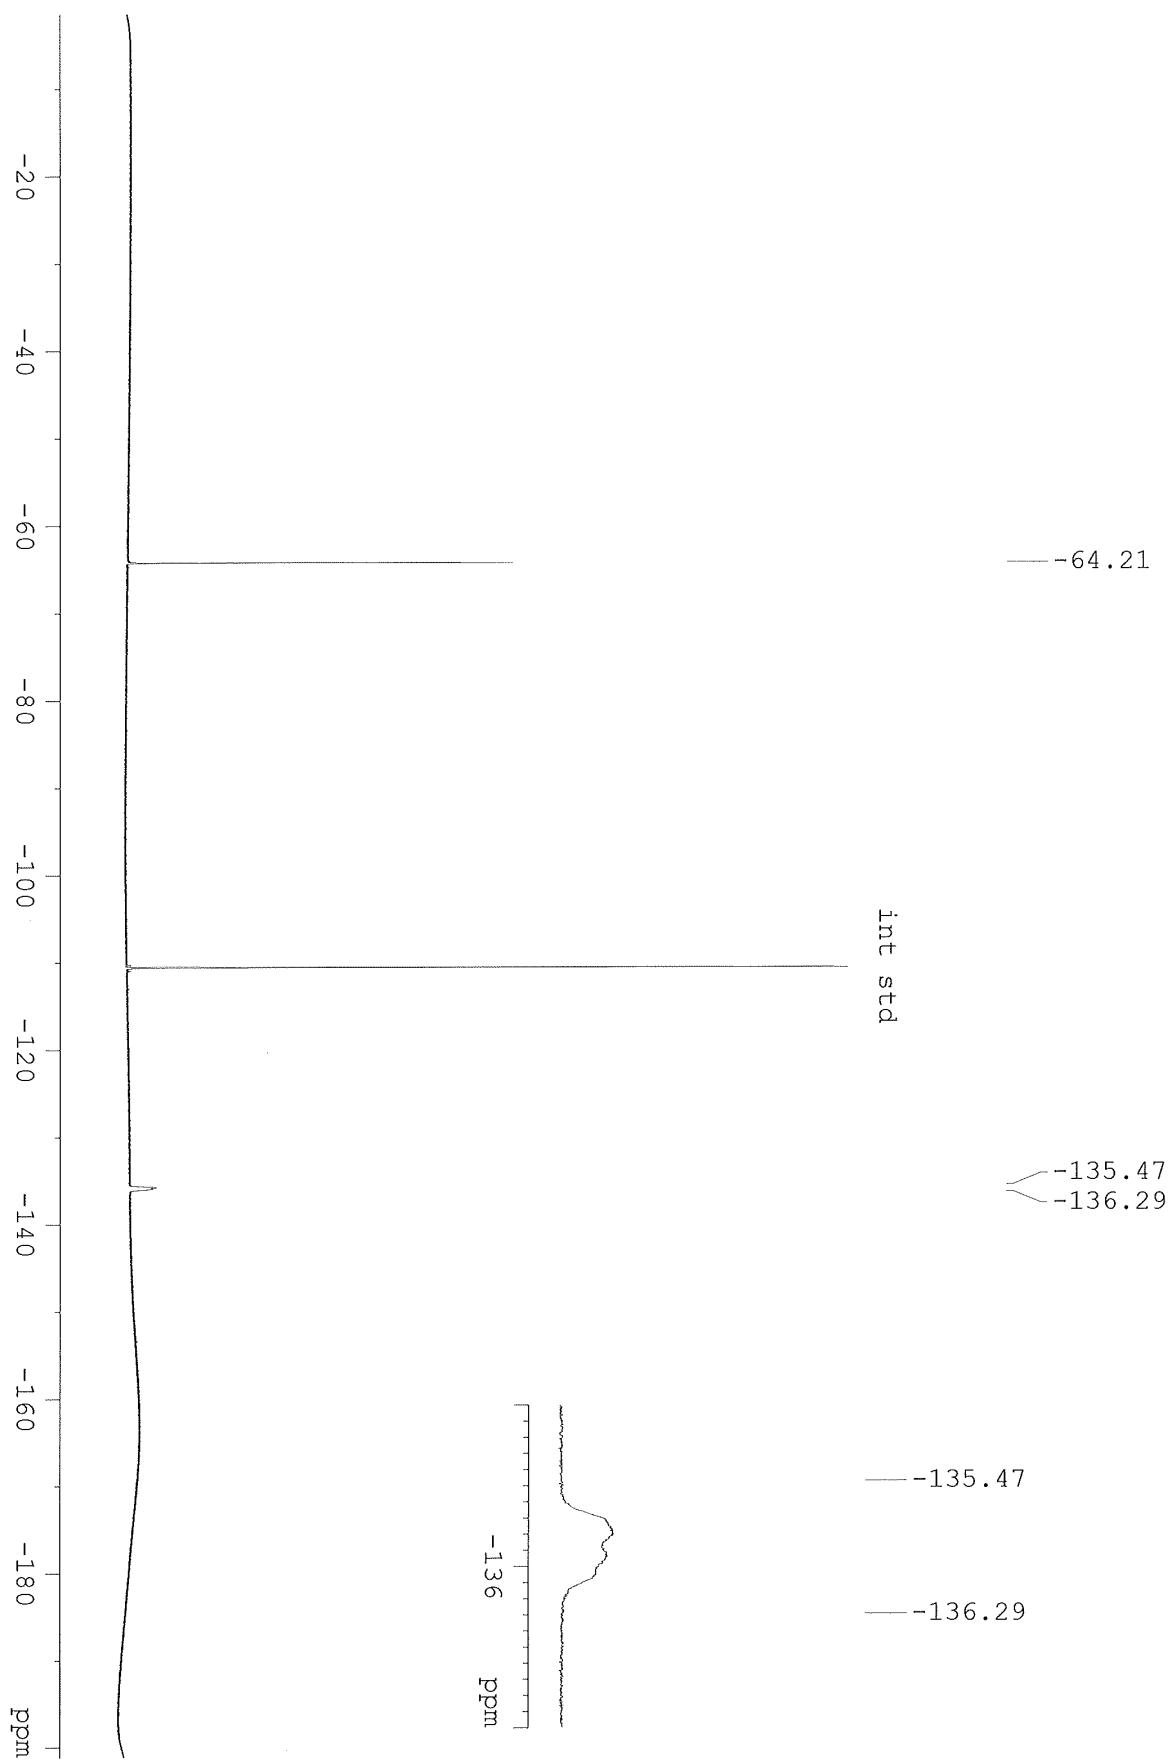

Compound 21 ( $^{13}\text{C}$  NMR in  $\text{MeCN-d}_3$ )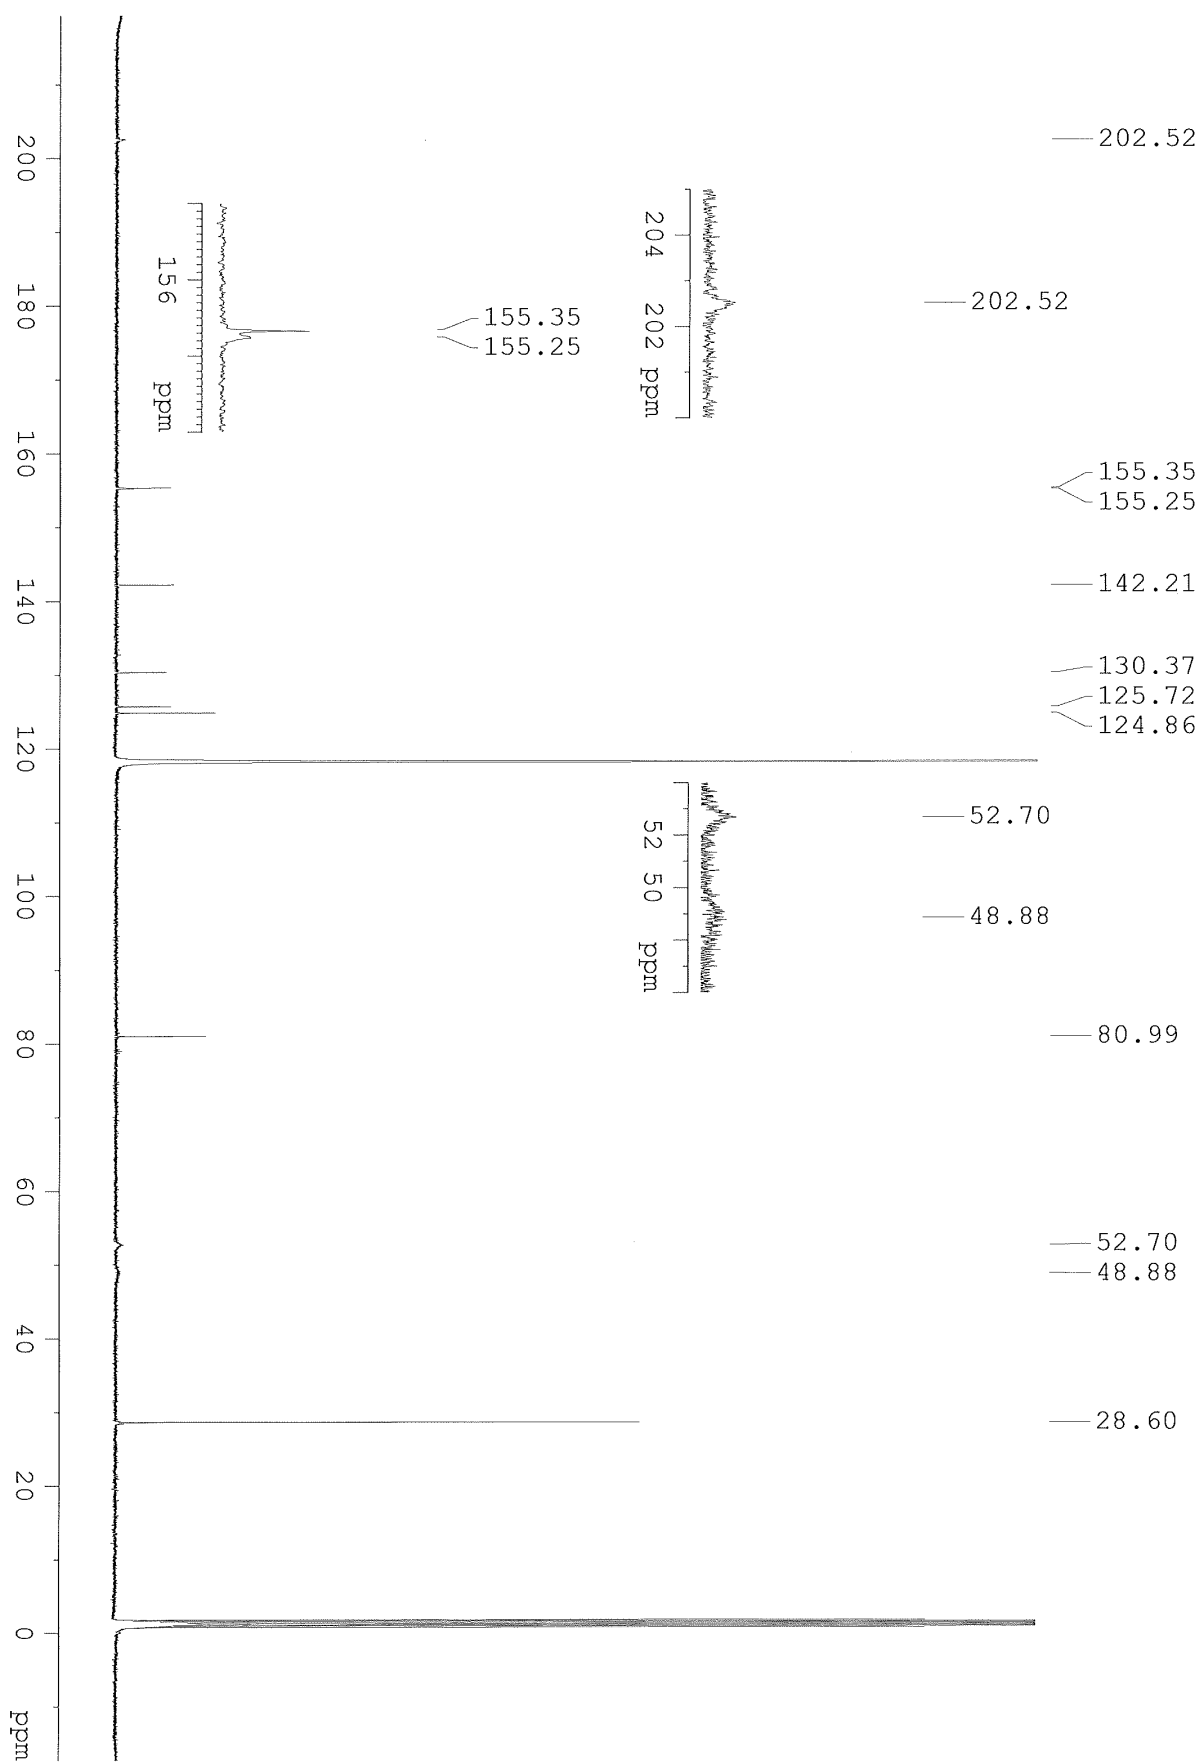

Compound 21 ( $^{19}\text{F}$  NMR in  $\text{MeCN-d}_3$ )

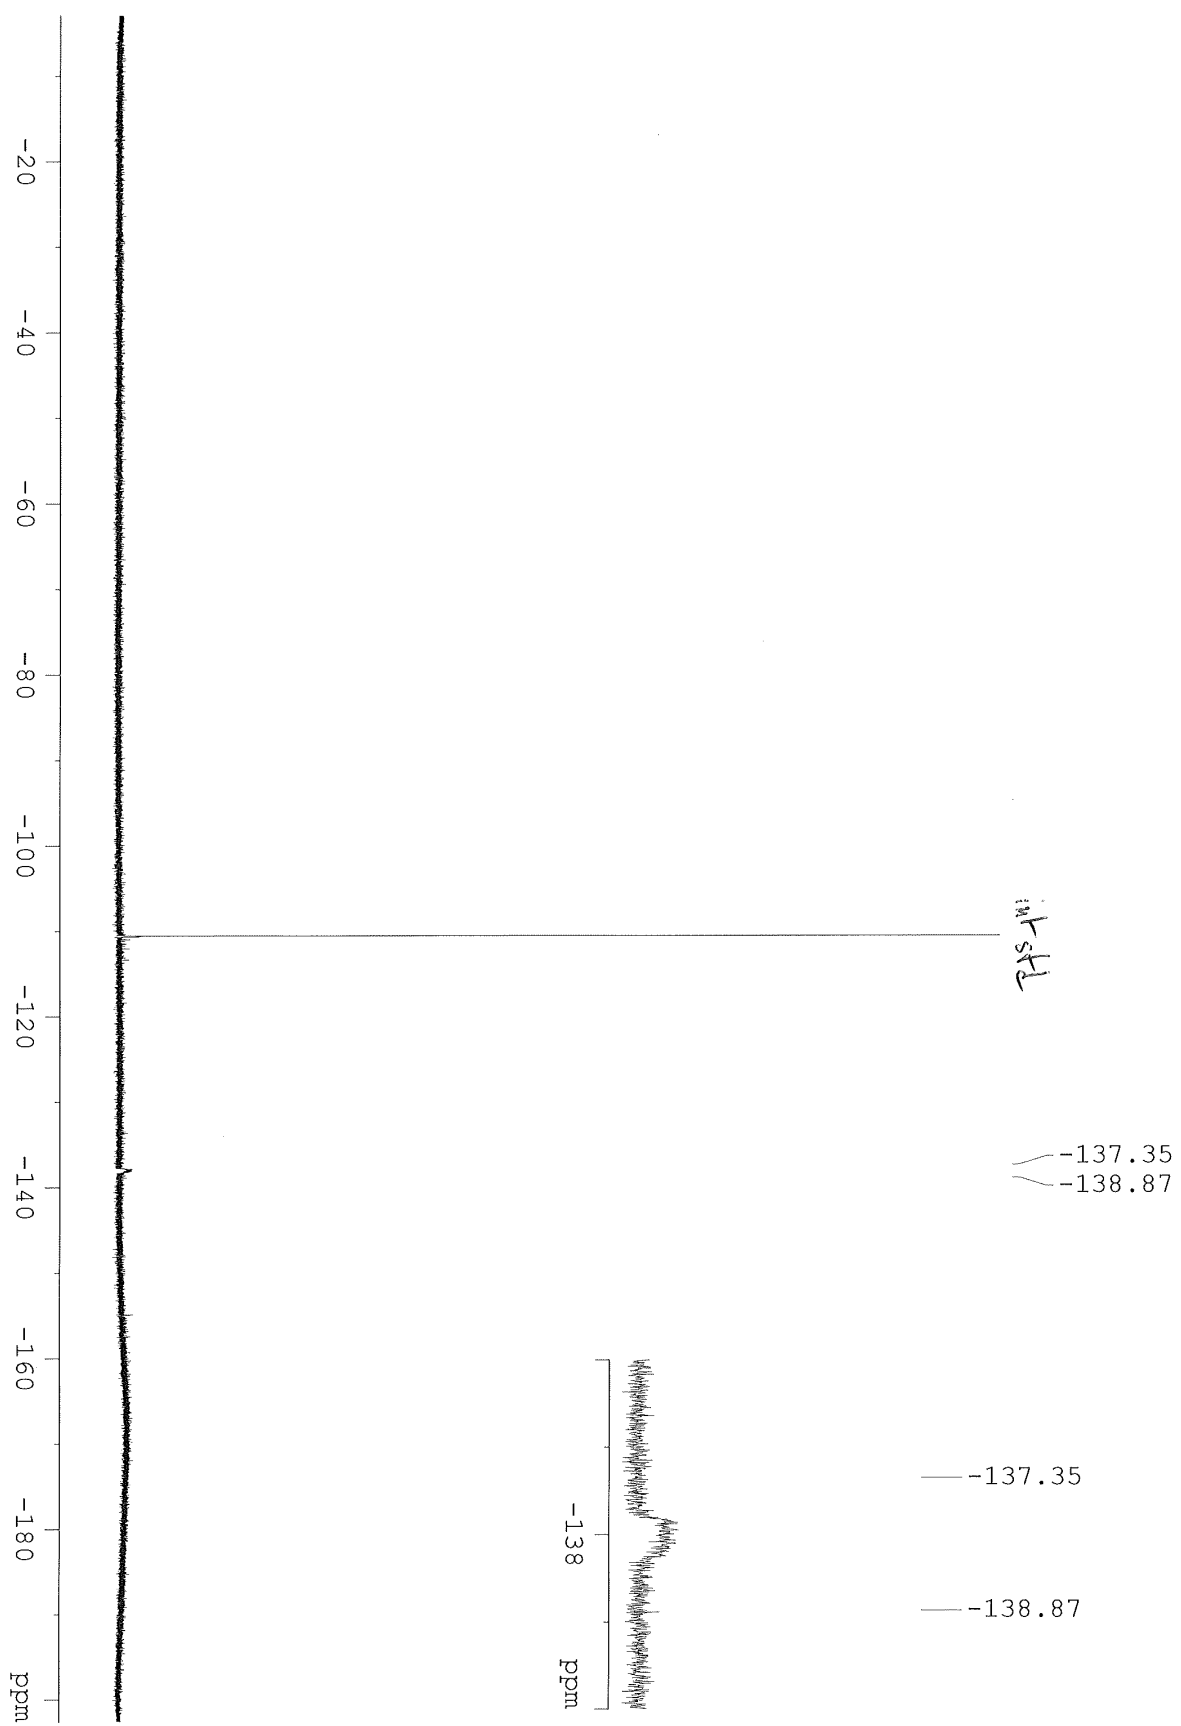

Compound 21 (11B NMR in MeCN-d<sub>3</sub>)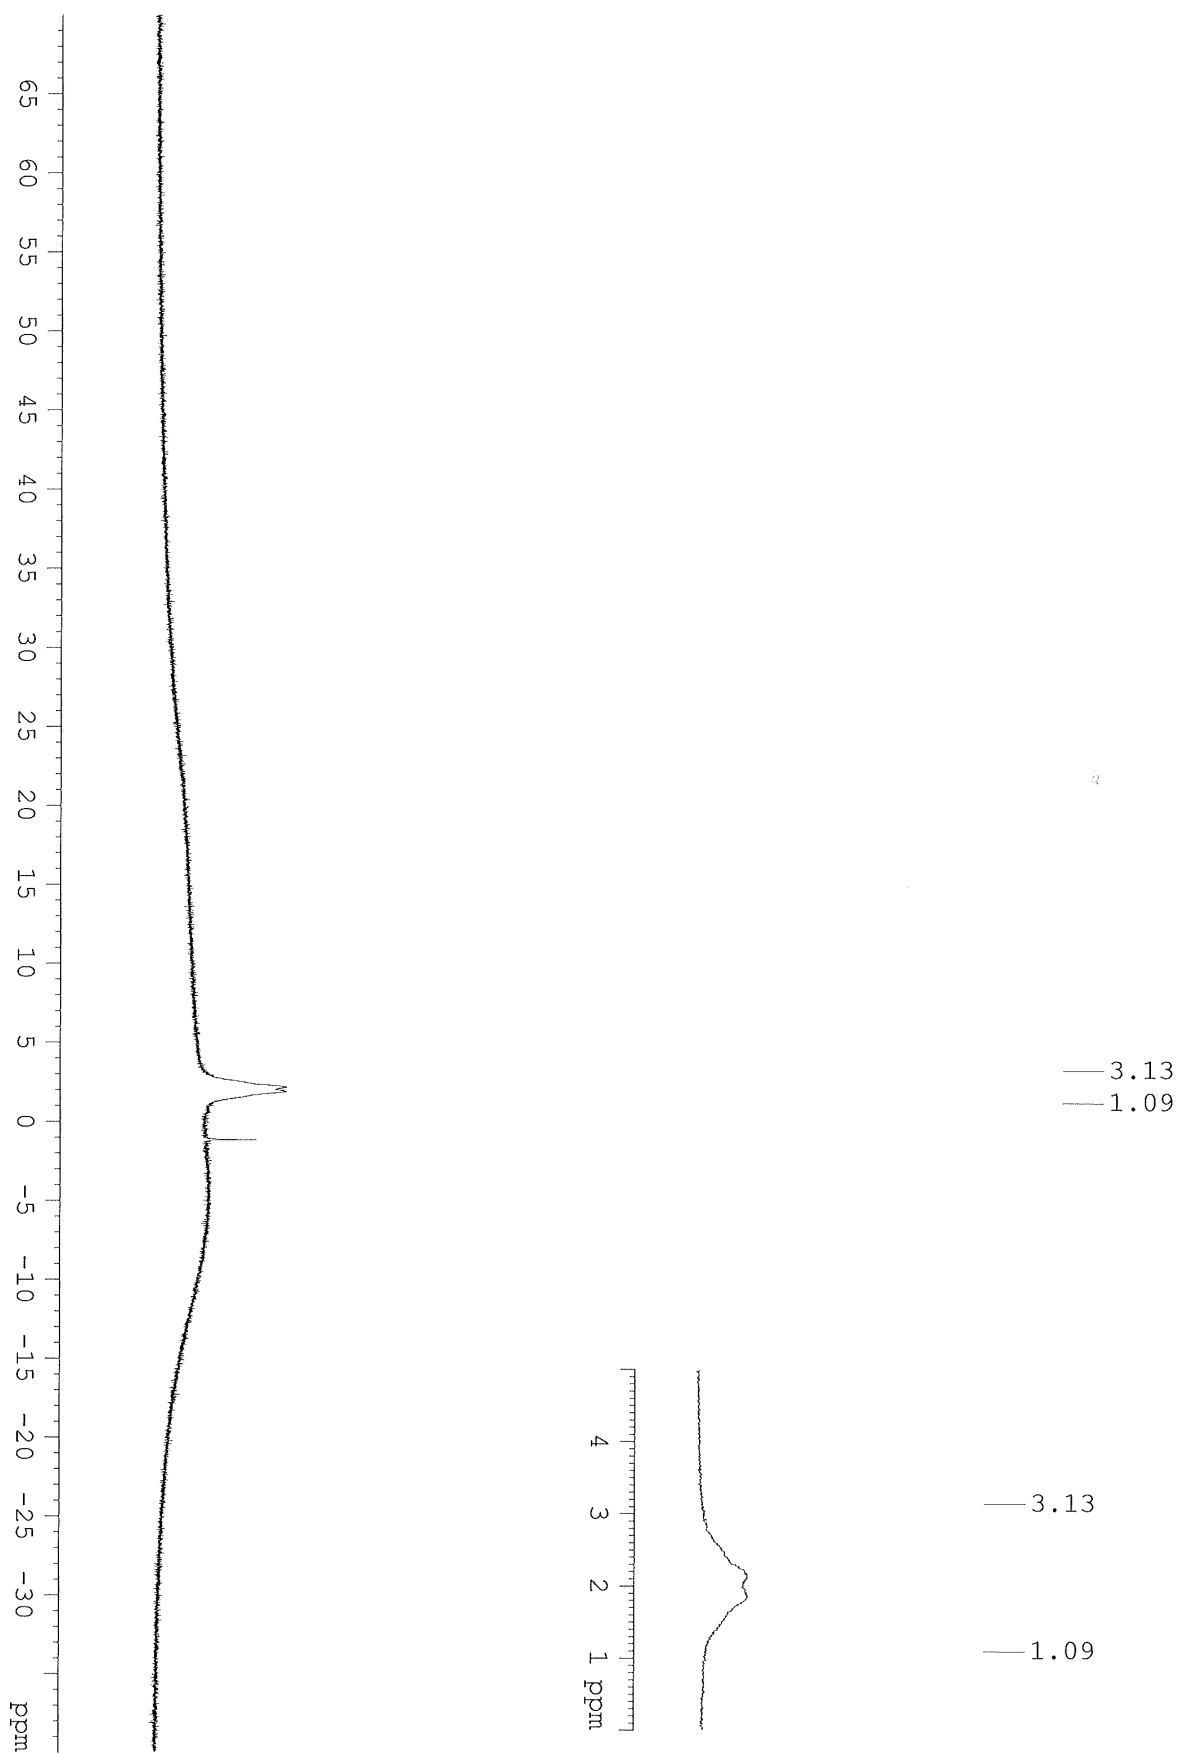

Compound 22 (1H NMR in DMSO-d6)

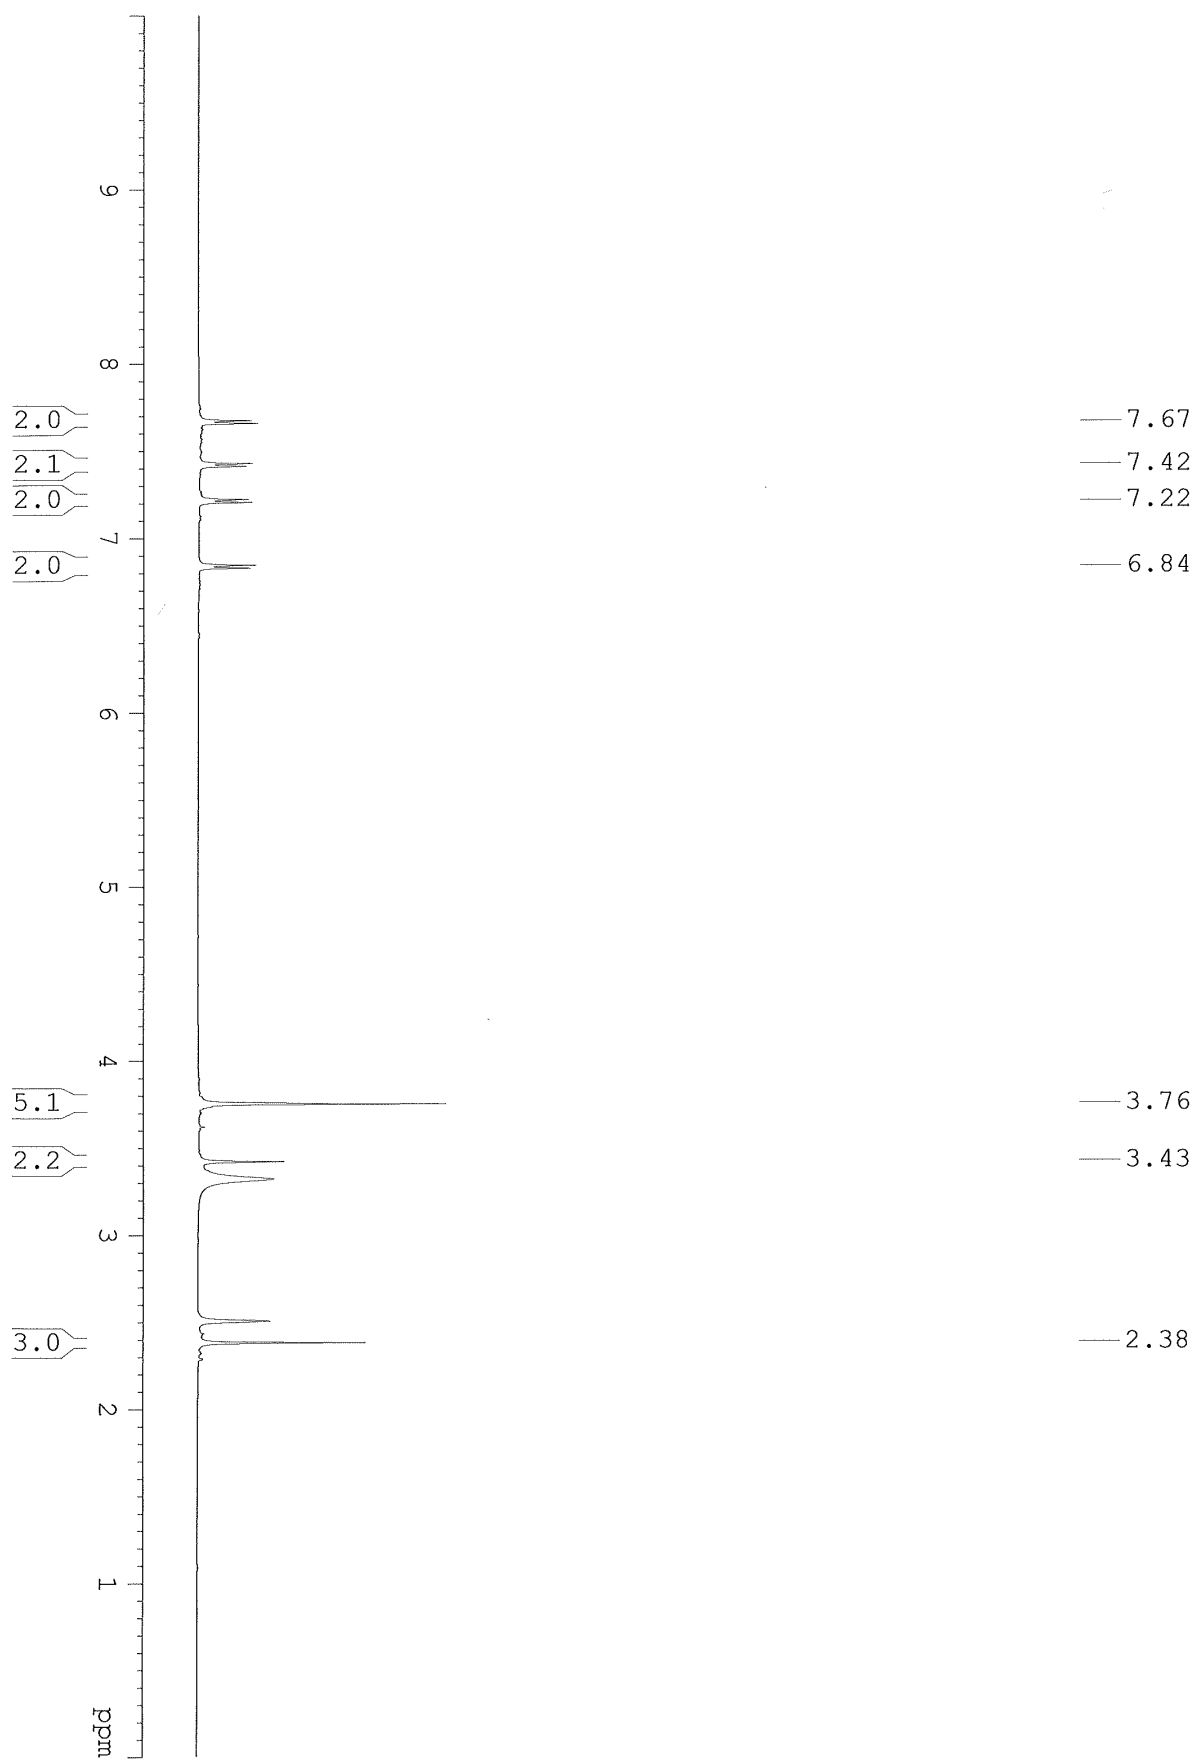

Compound 22 ( $^{13}\text{C}$  NMR (APT) in DMSO- $d_6$ )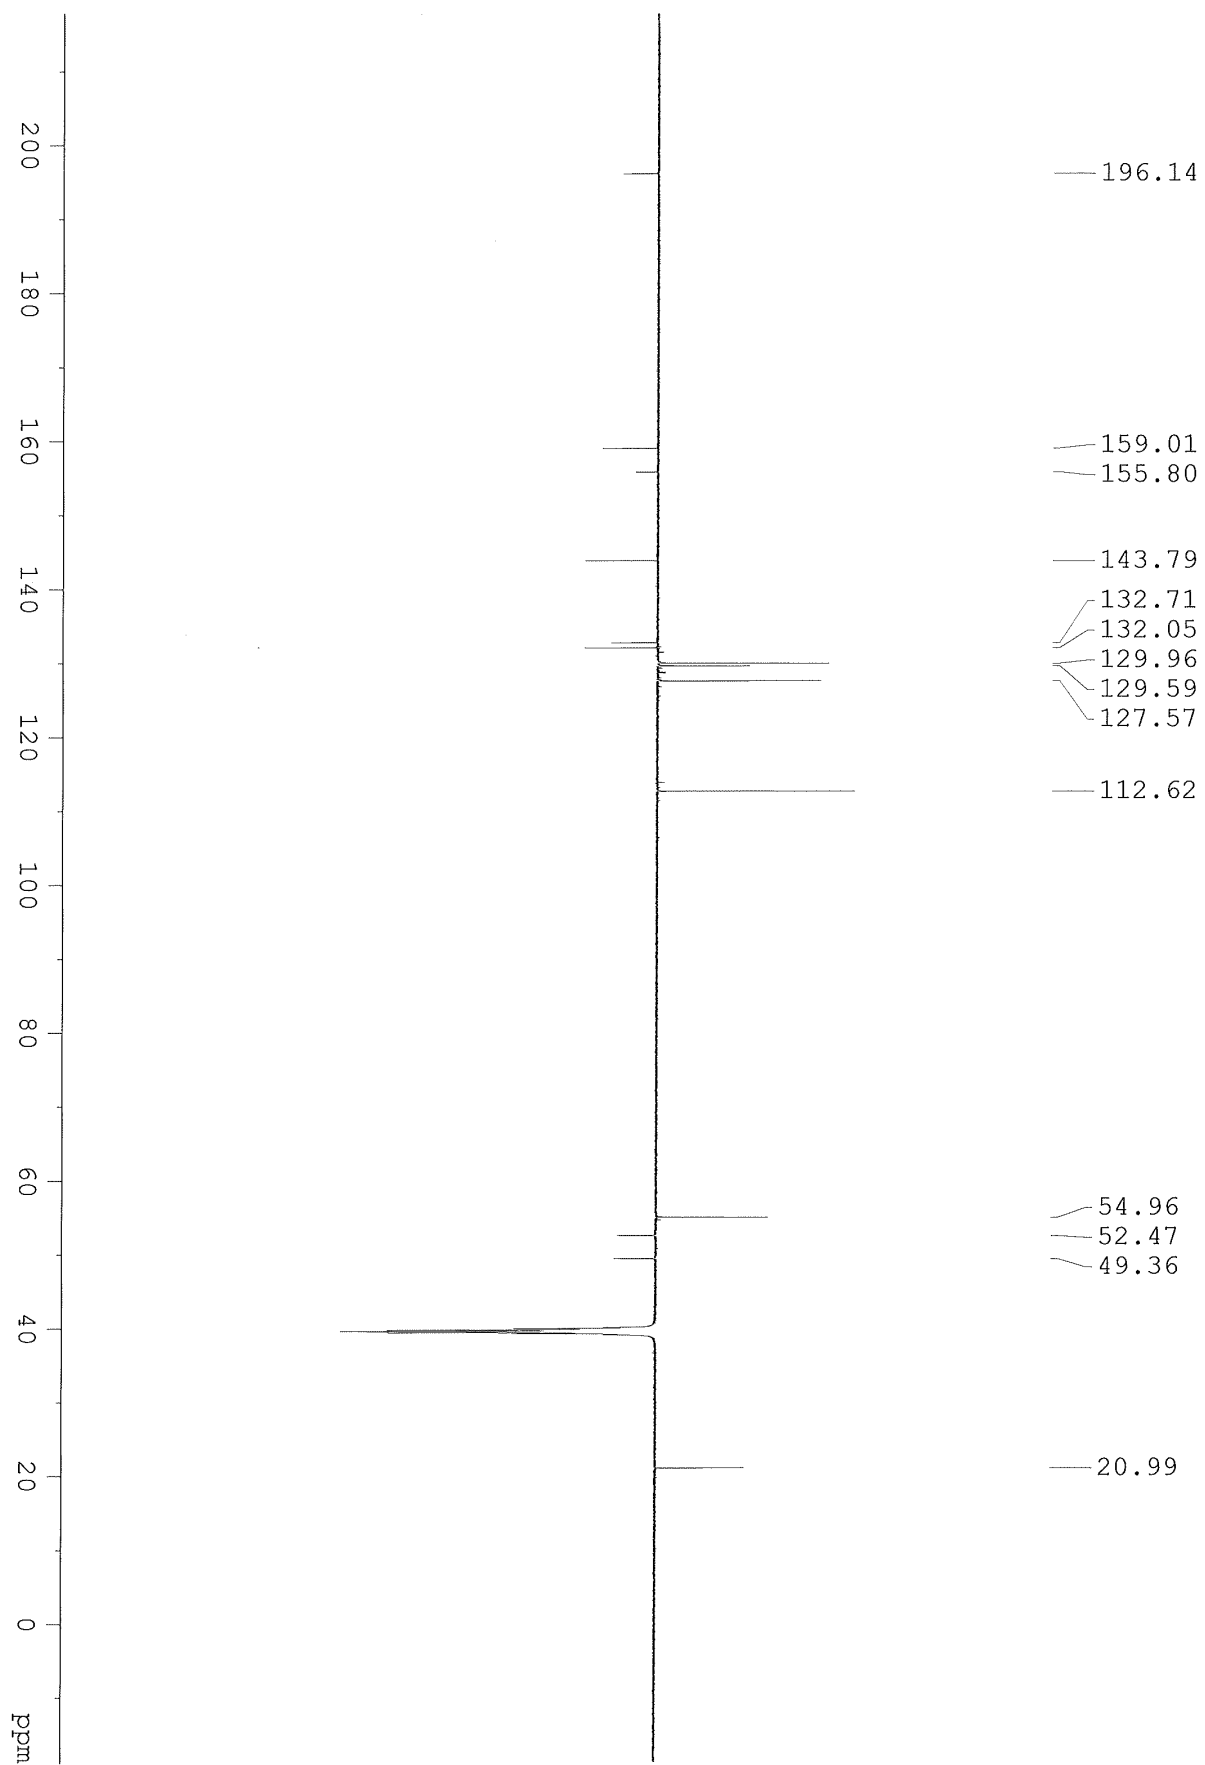

Compound 22 ( $^{19}\text{F}$  NMR in  $\text{MeCN-d}_3$ )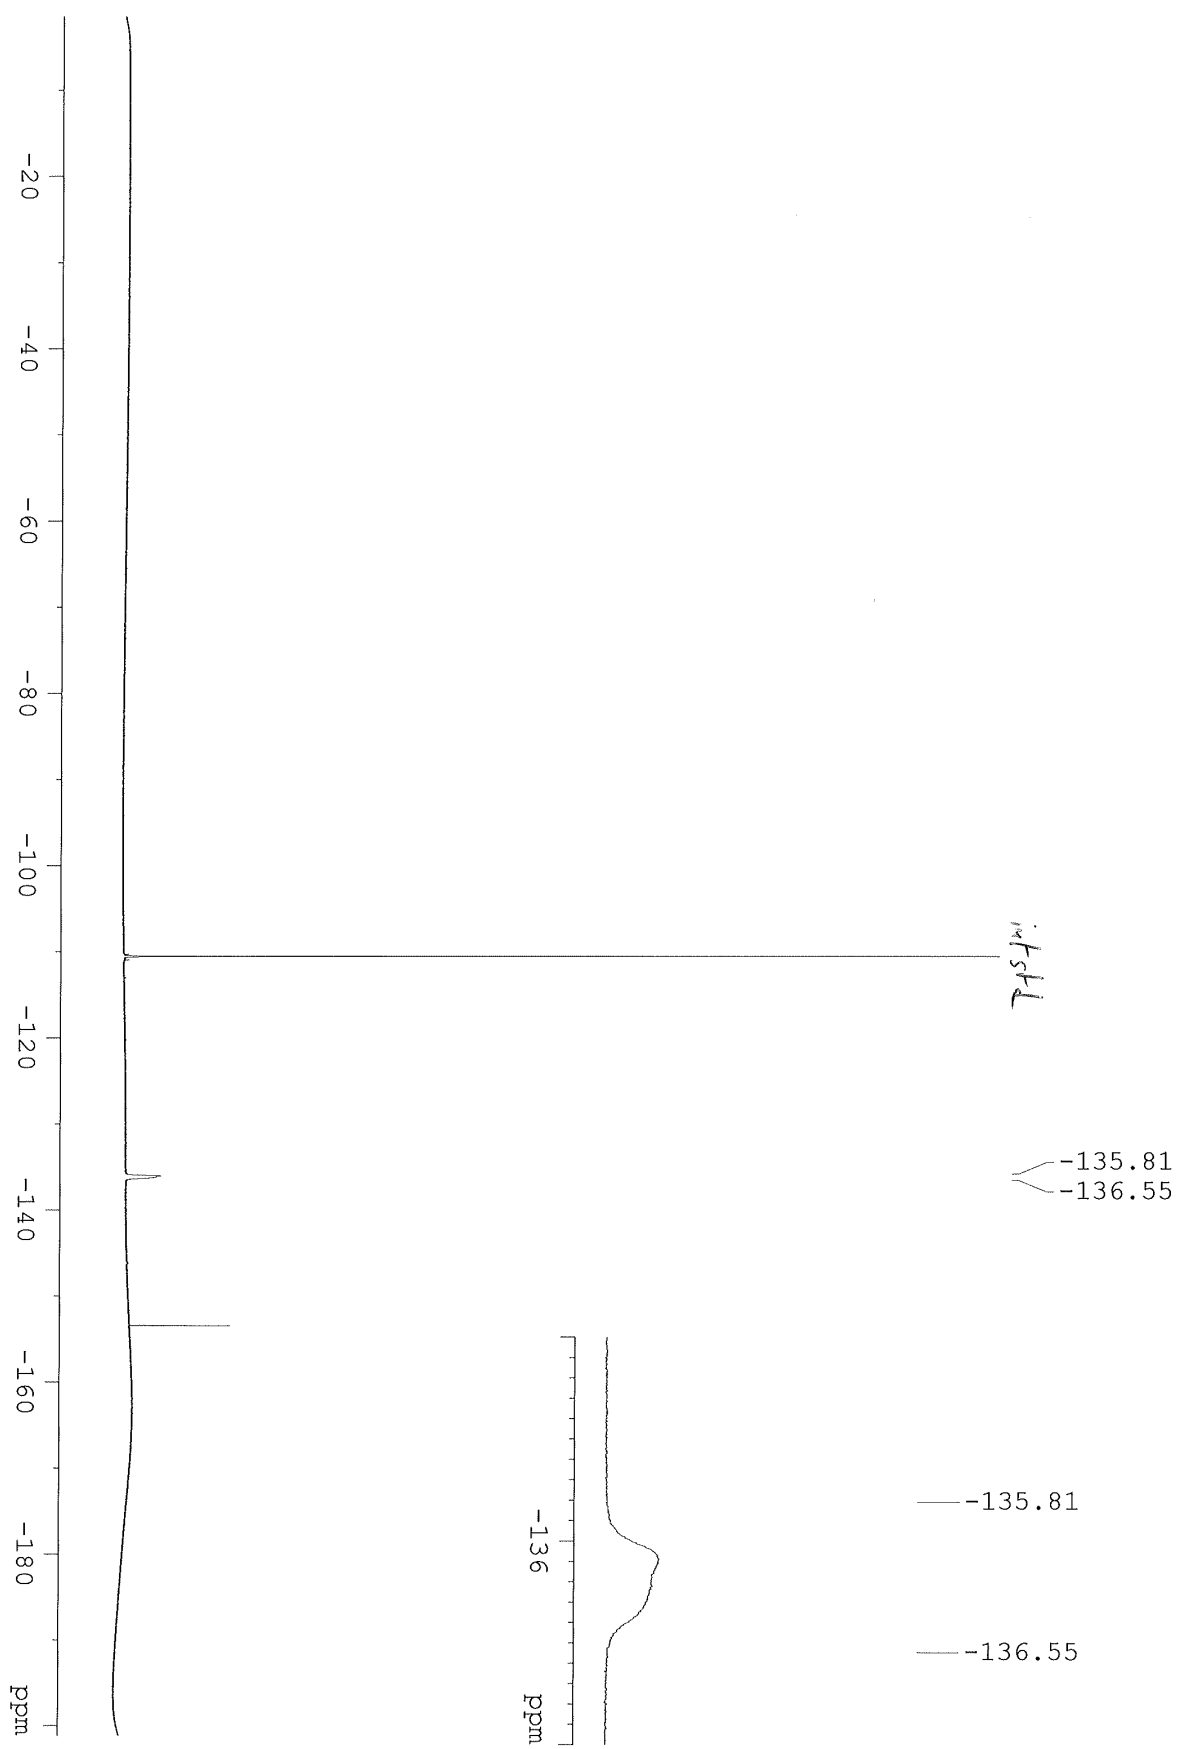



Compound 22 (11B NMR in DMSO-d<sub>6</sub>)

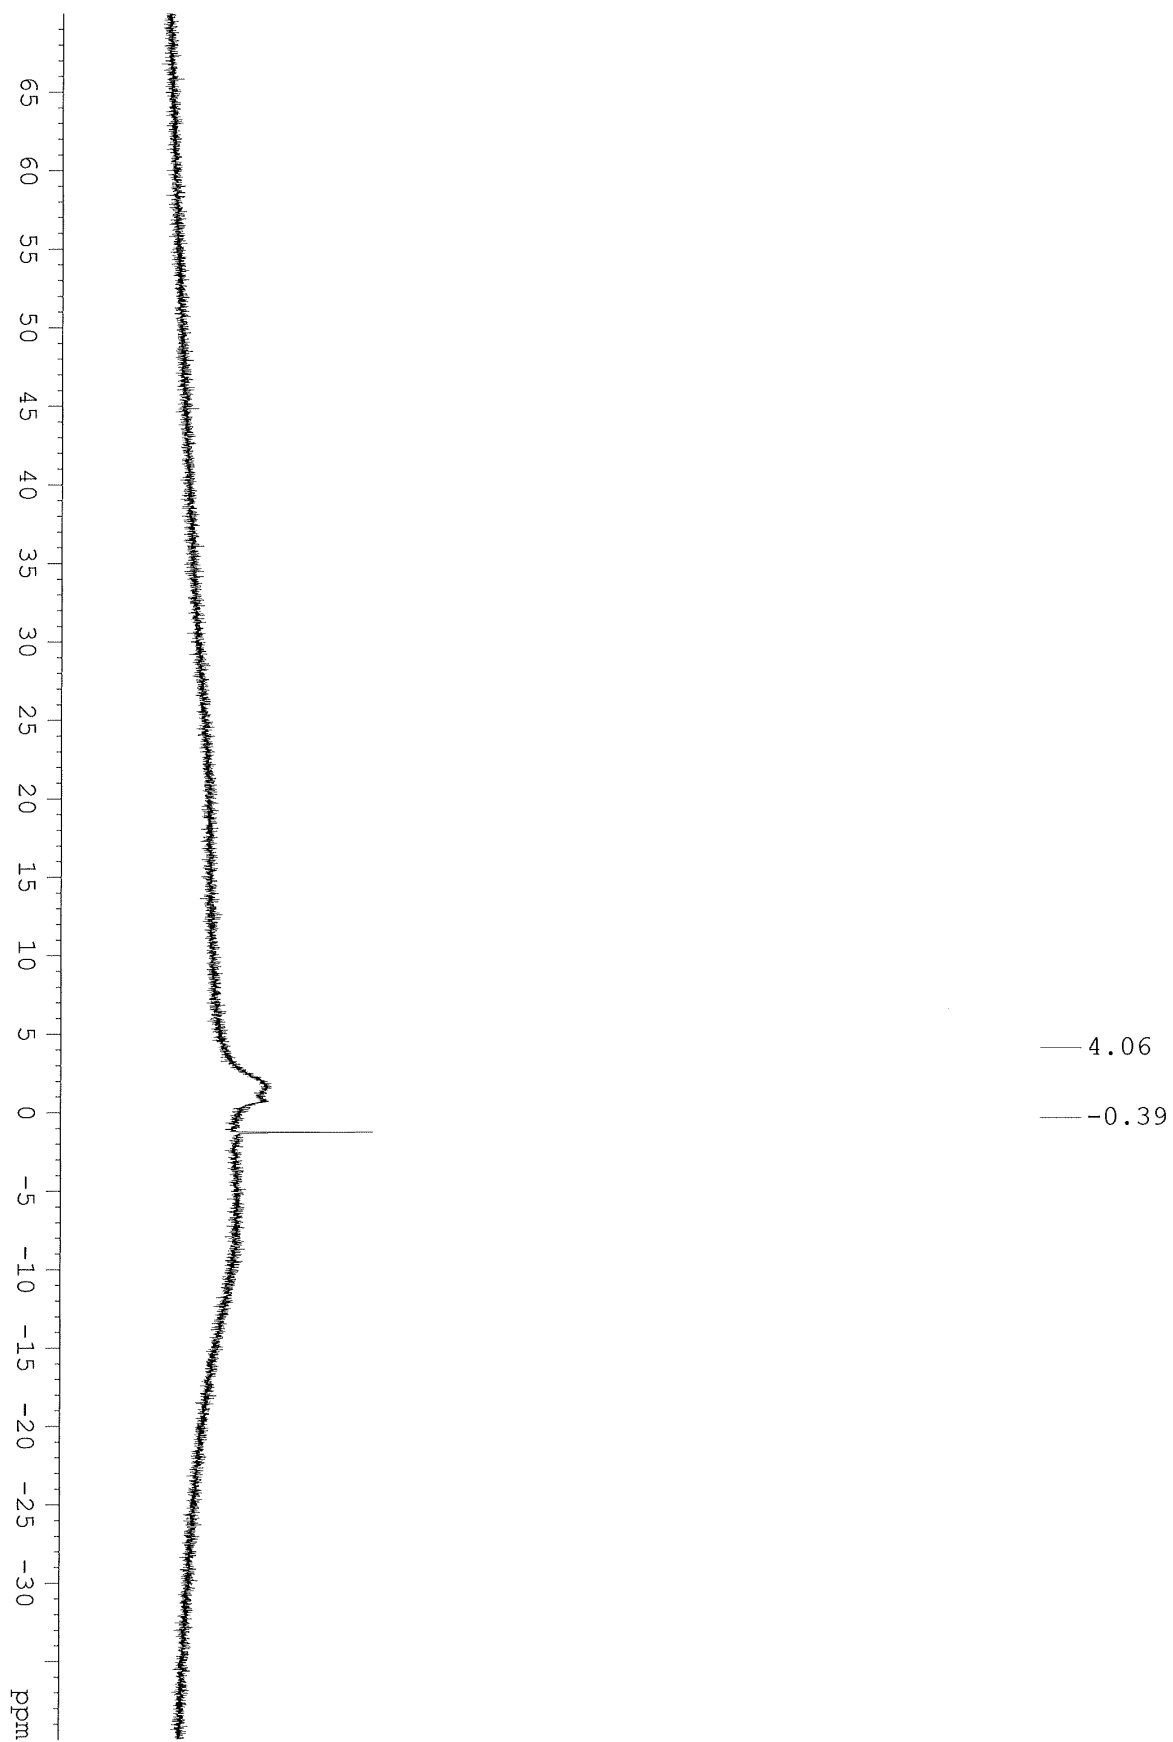

Compound 23 ( $^1\text{H}$  NMR in  $\text{DMSO-d}_6$ )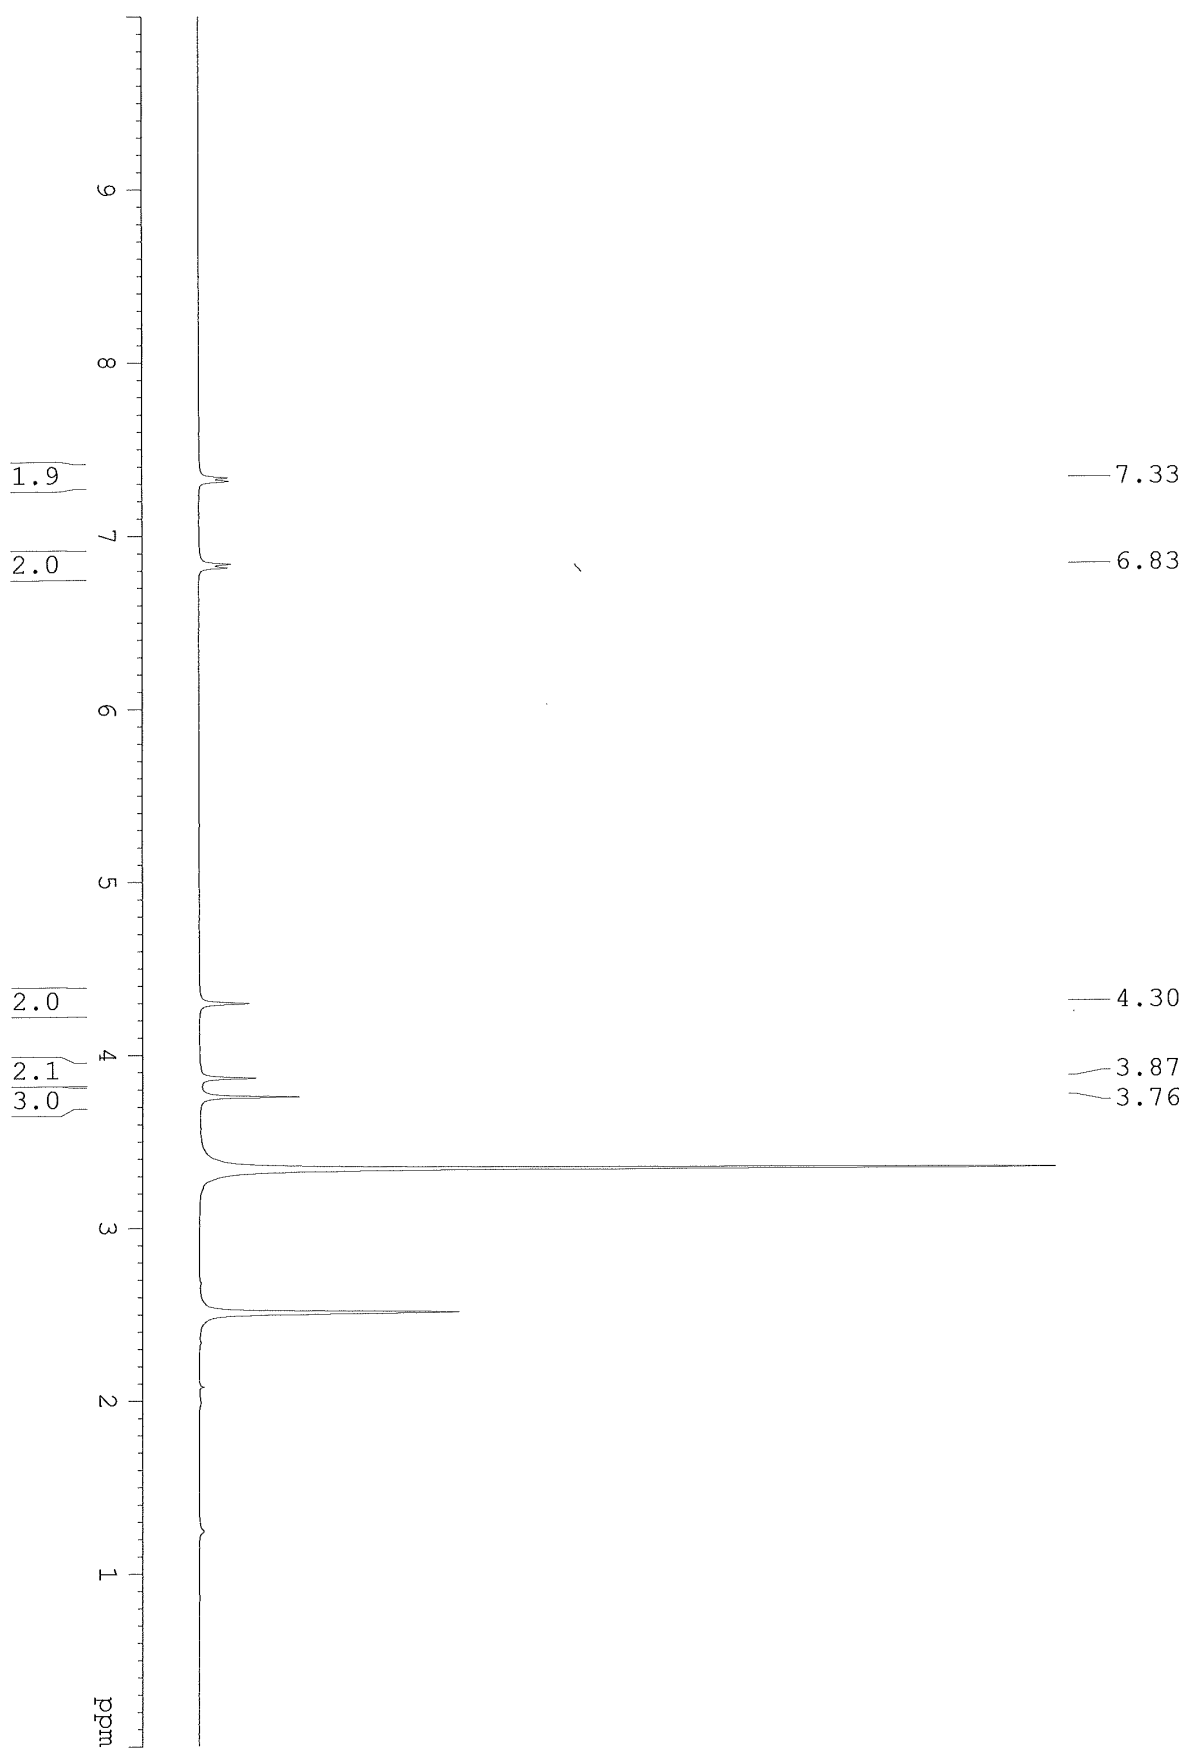

Compound 23 ( $^{13}\text{C}$  NMR in  $\text{DMSO-d}_6$ )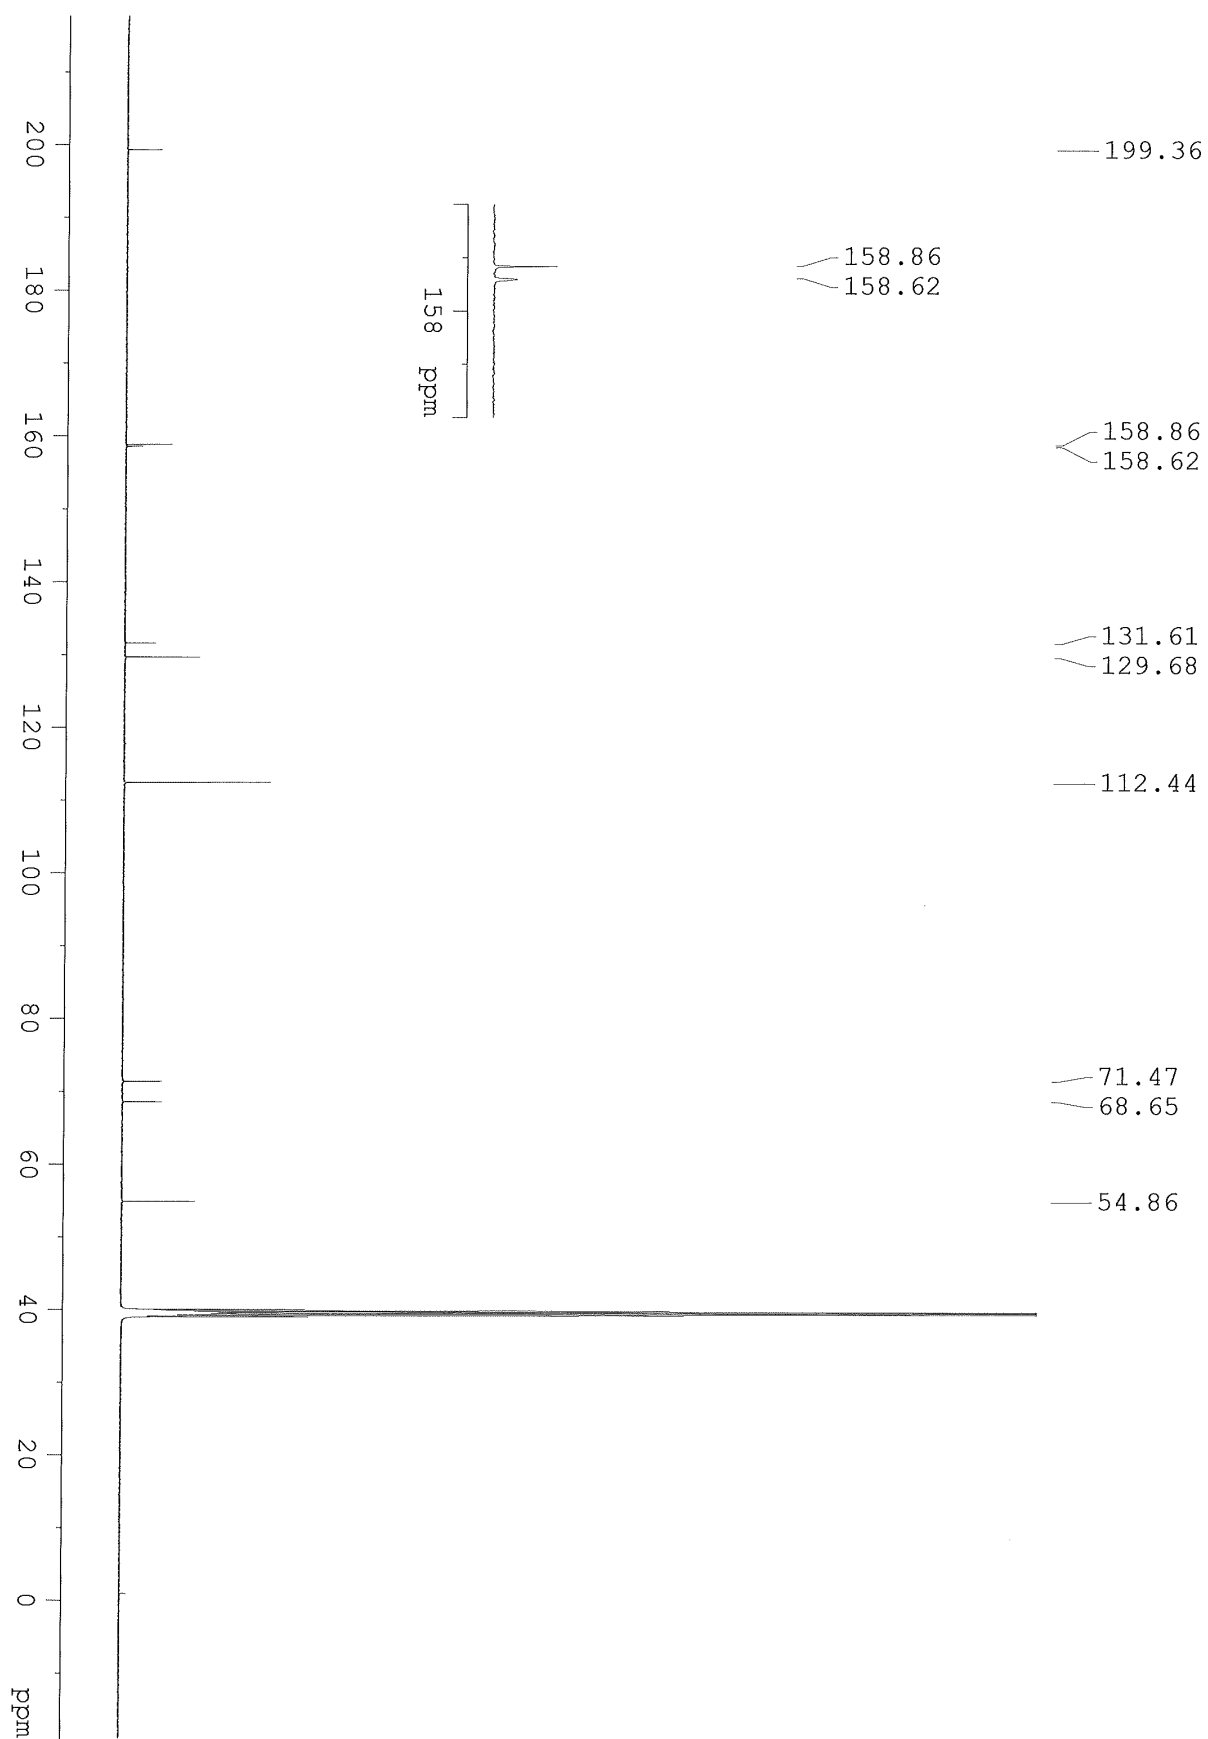

Compound 23 ( $^{19}\text{F}$  NMR in  $\text{MeCN-d}_3$ )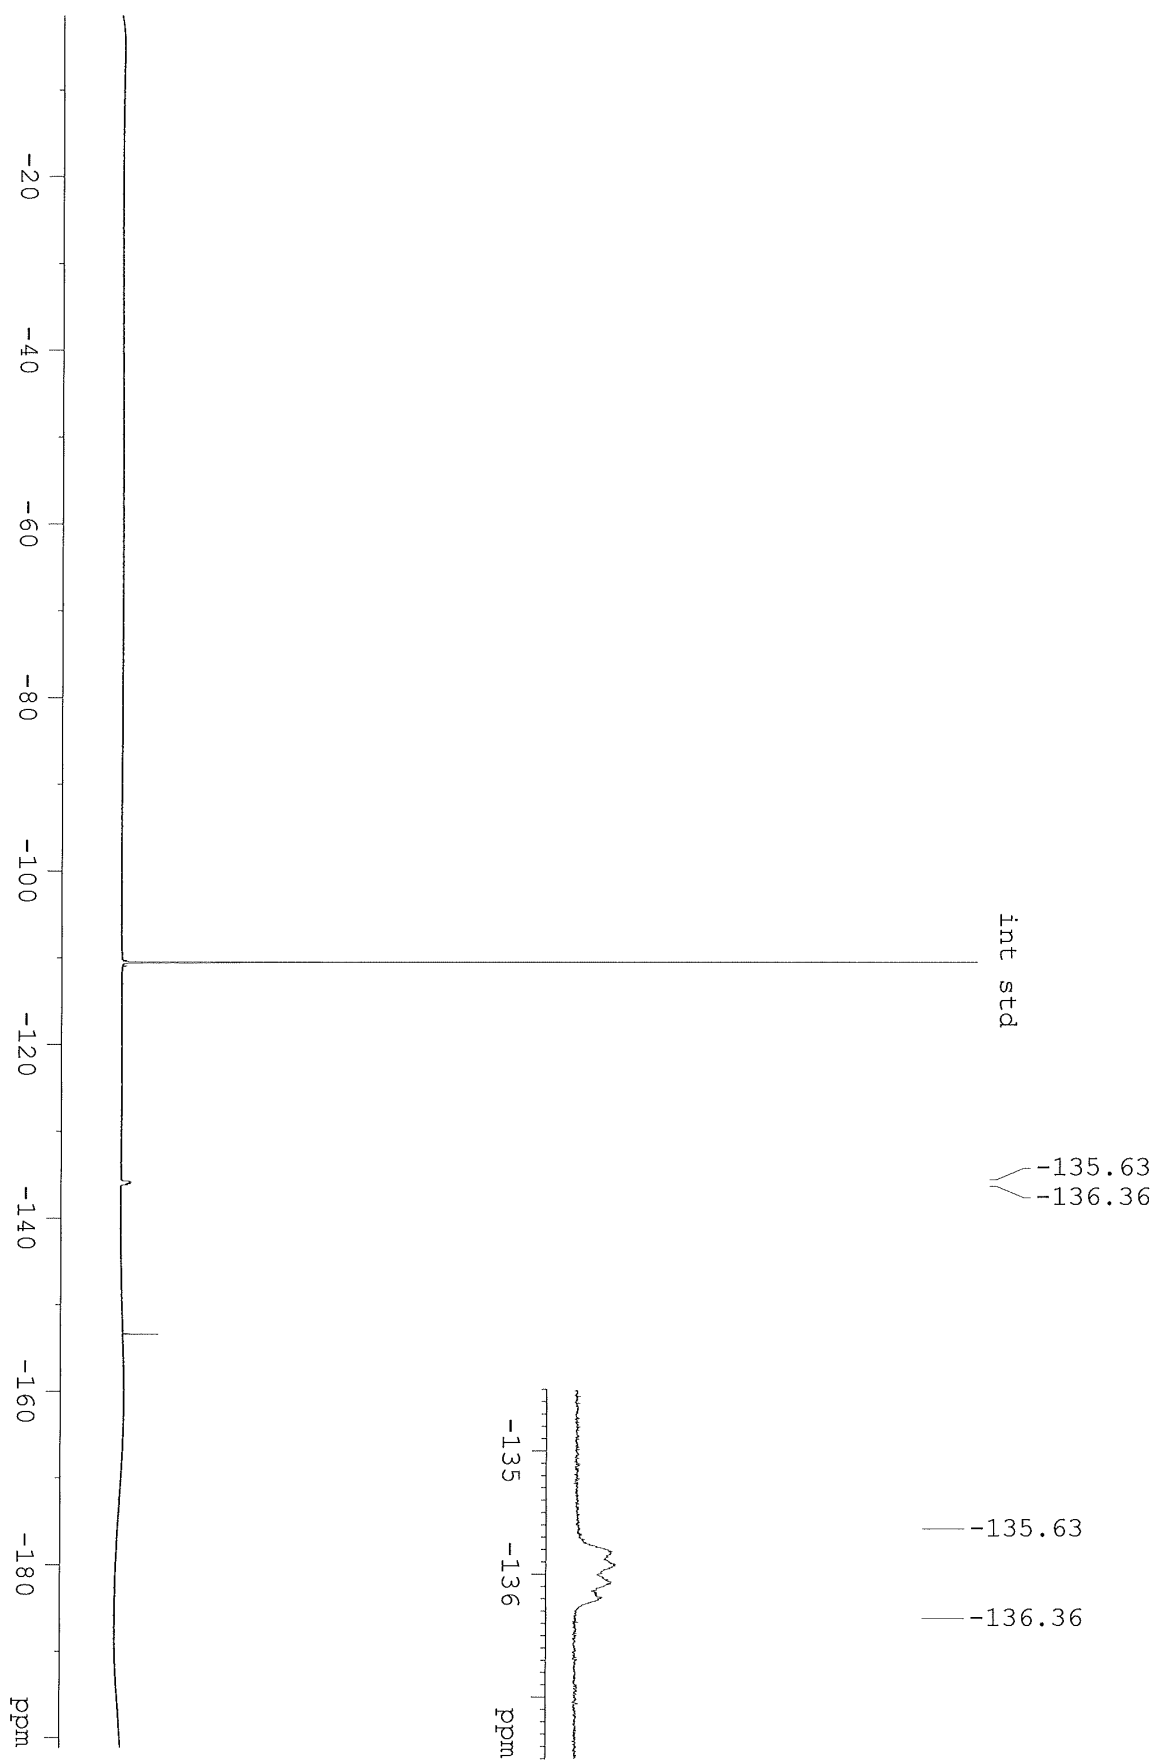

Compound 23 (11B NMR in MeCN-d<sub>3</sub>)

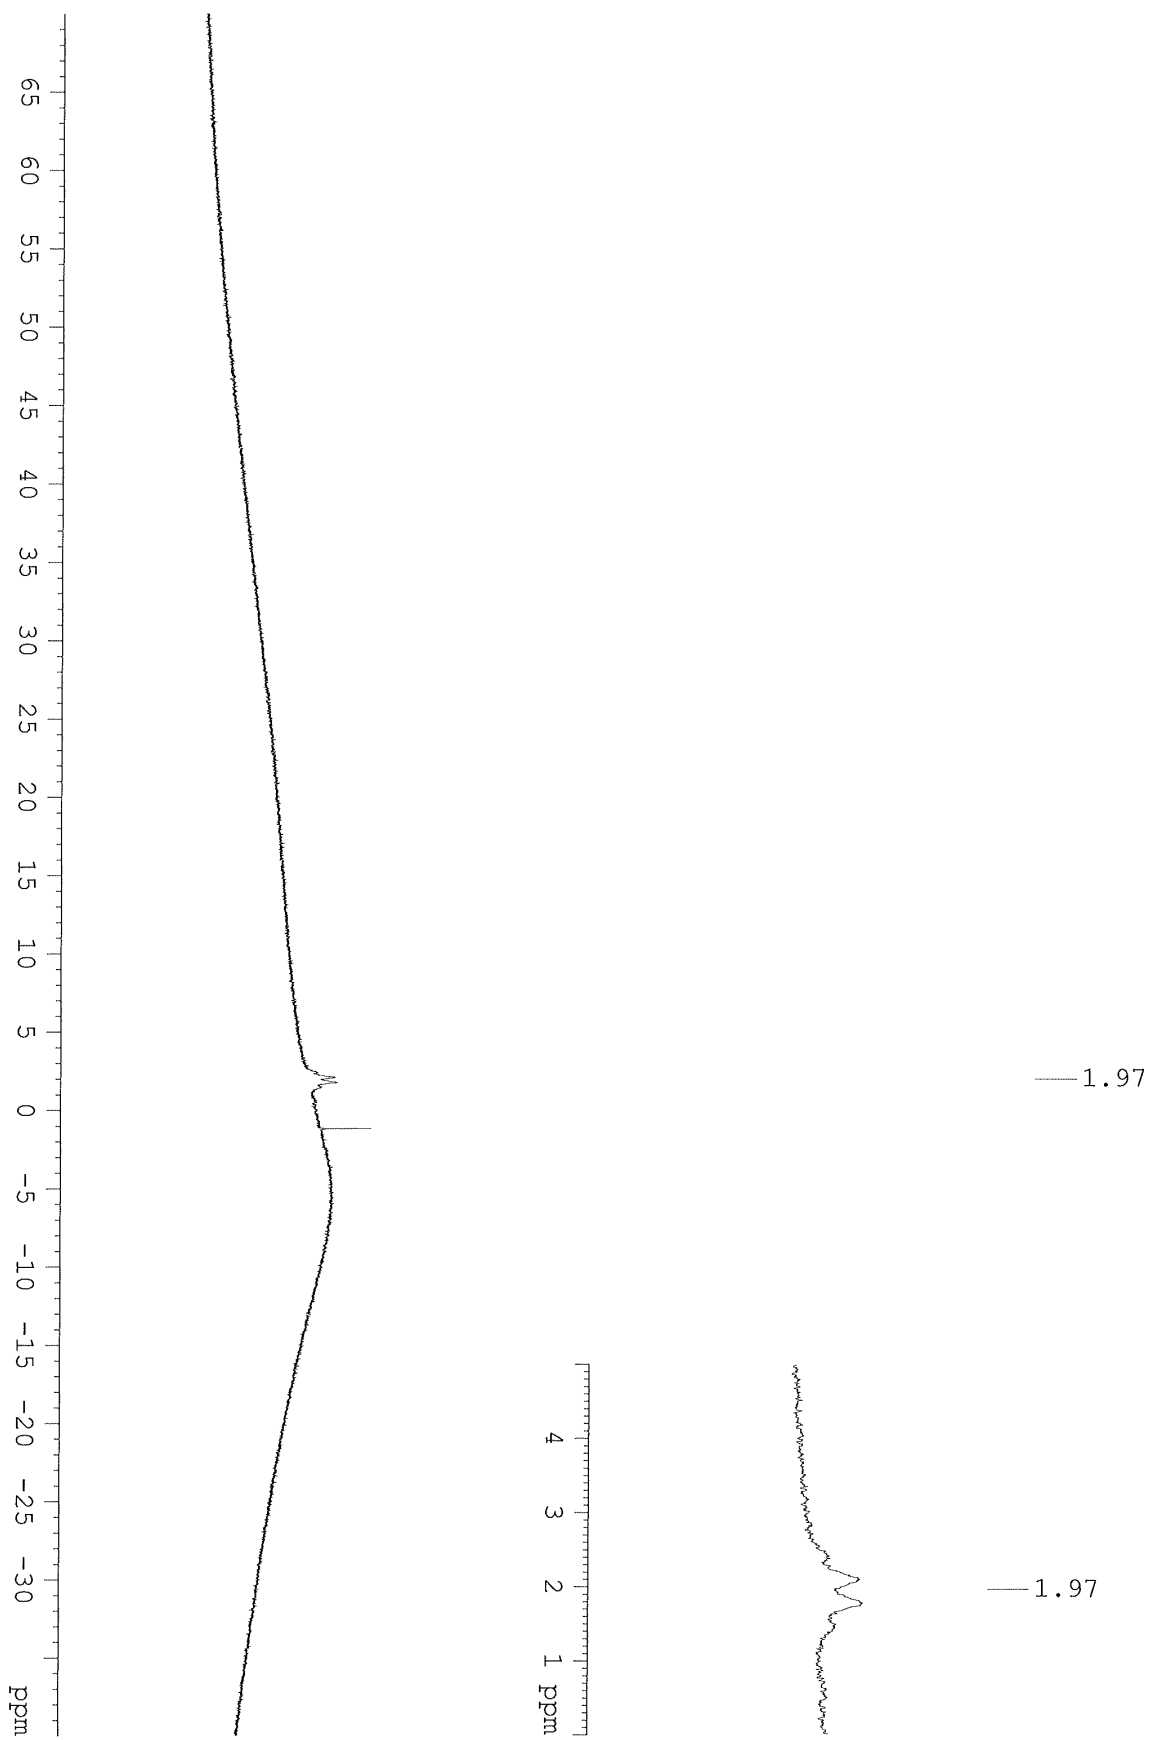

Compound 24 ( $^1\text{H}$  NMR in  $\text{DMSO-d}_6$ )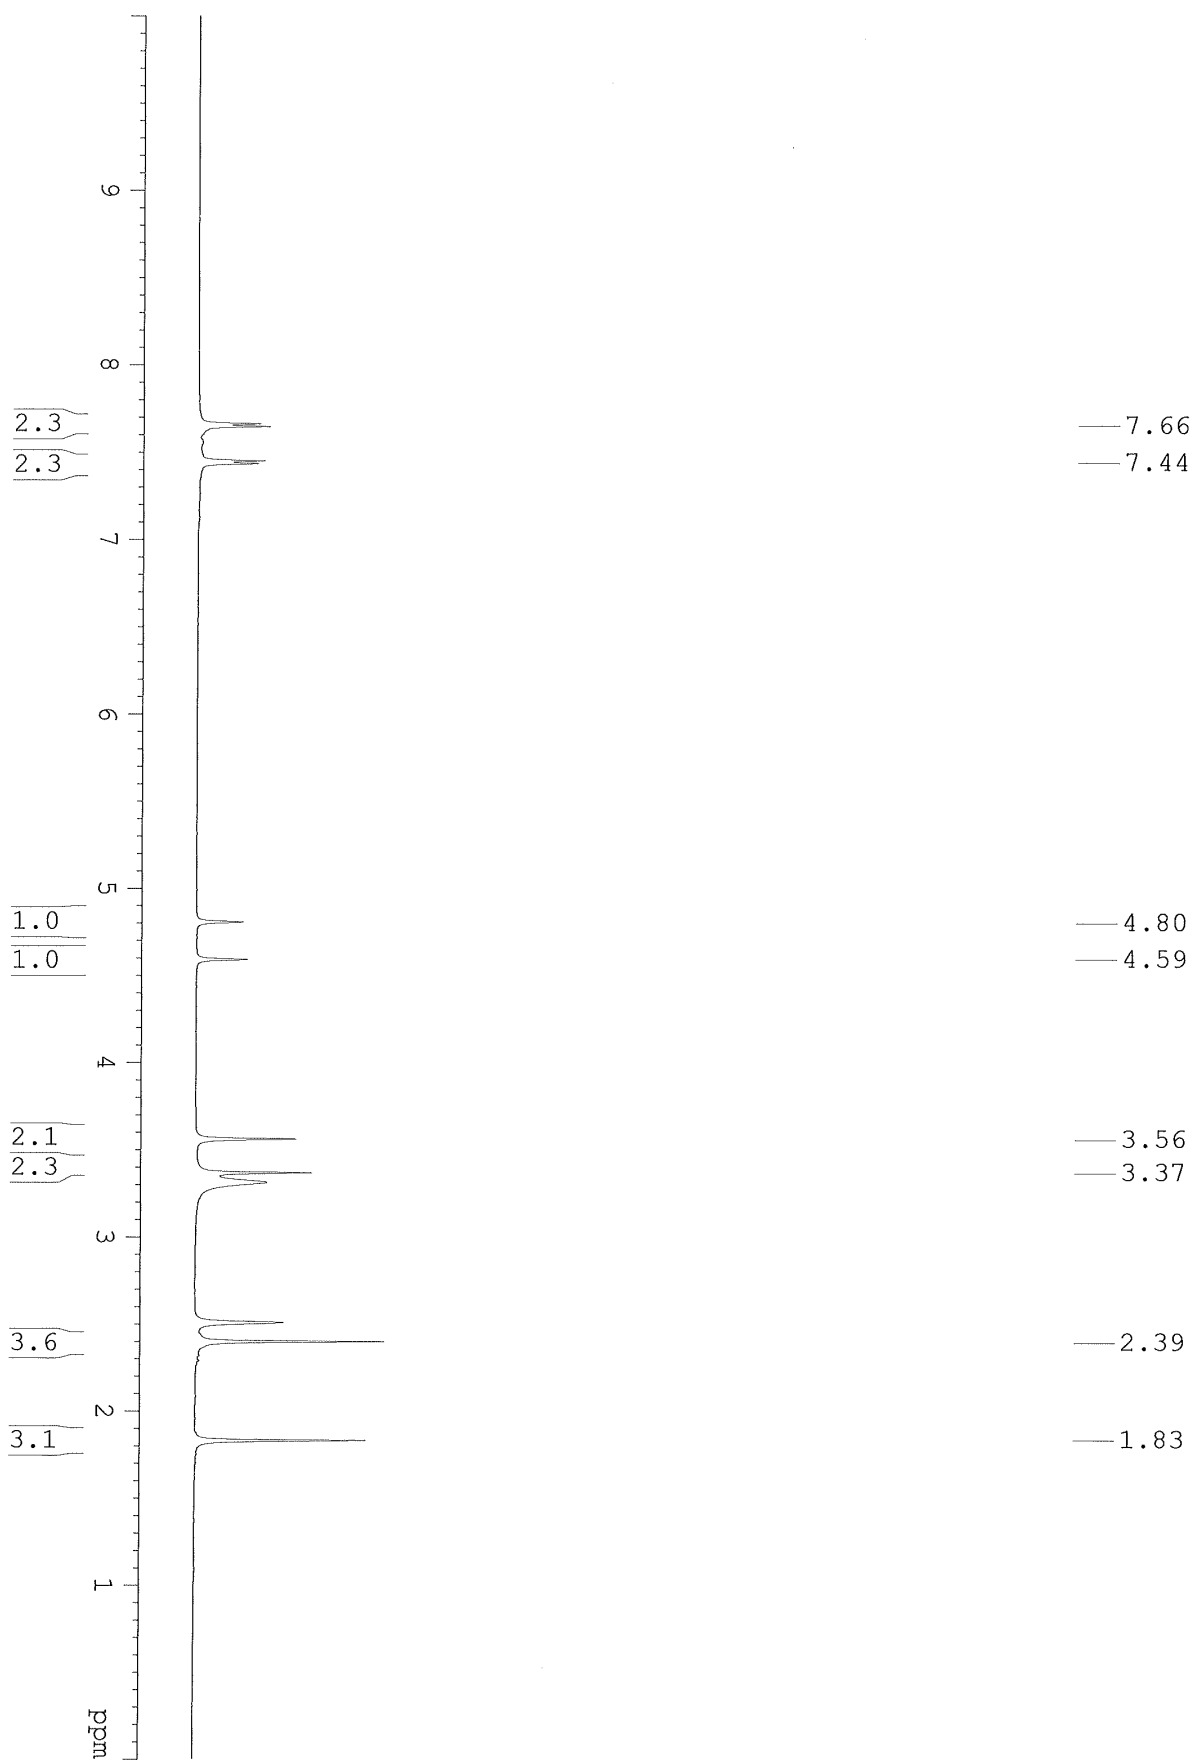

Compound 24 ( $^{13}\text{C}$  NMR (APT) in  $\text{DMSO-d}_6$ )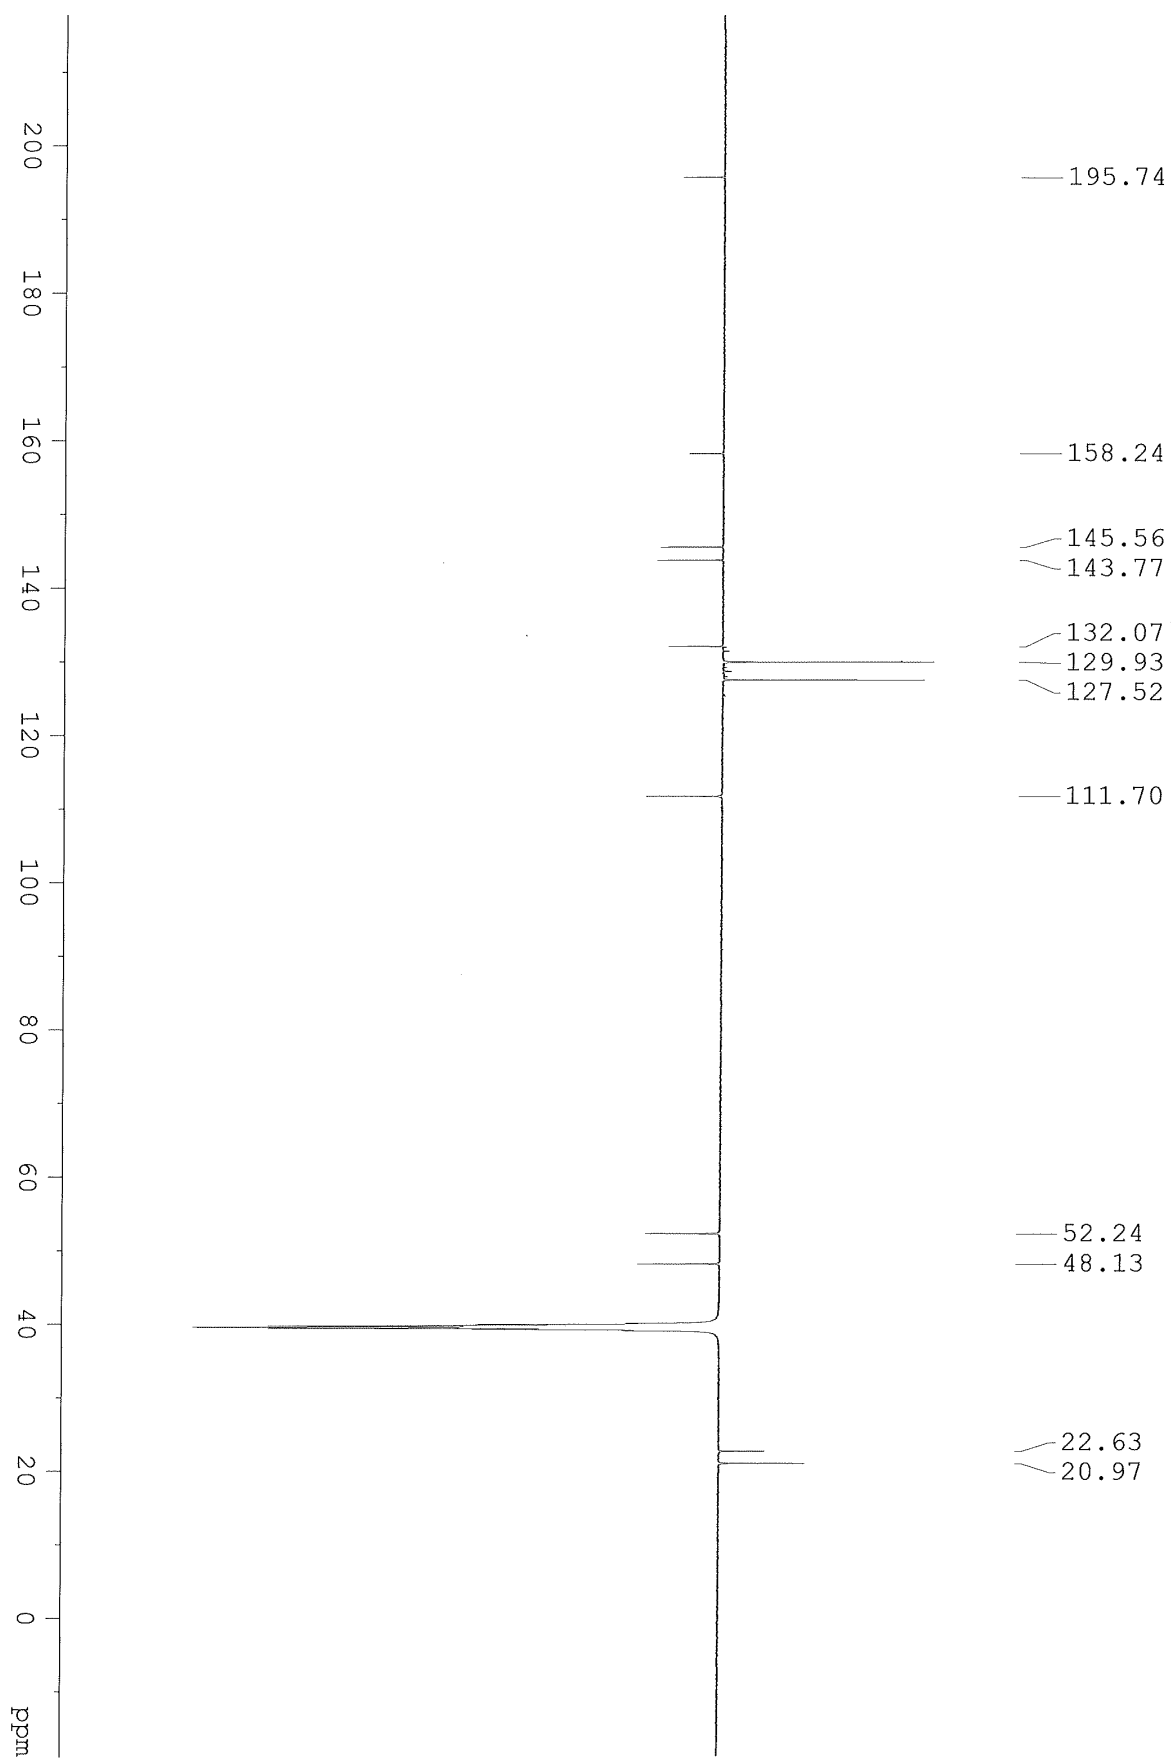

Compound 24 ( $^{19}\text{F}$  NMR in  $\text{MeCN-d}_3$ )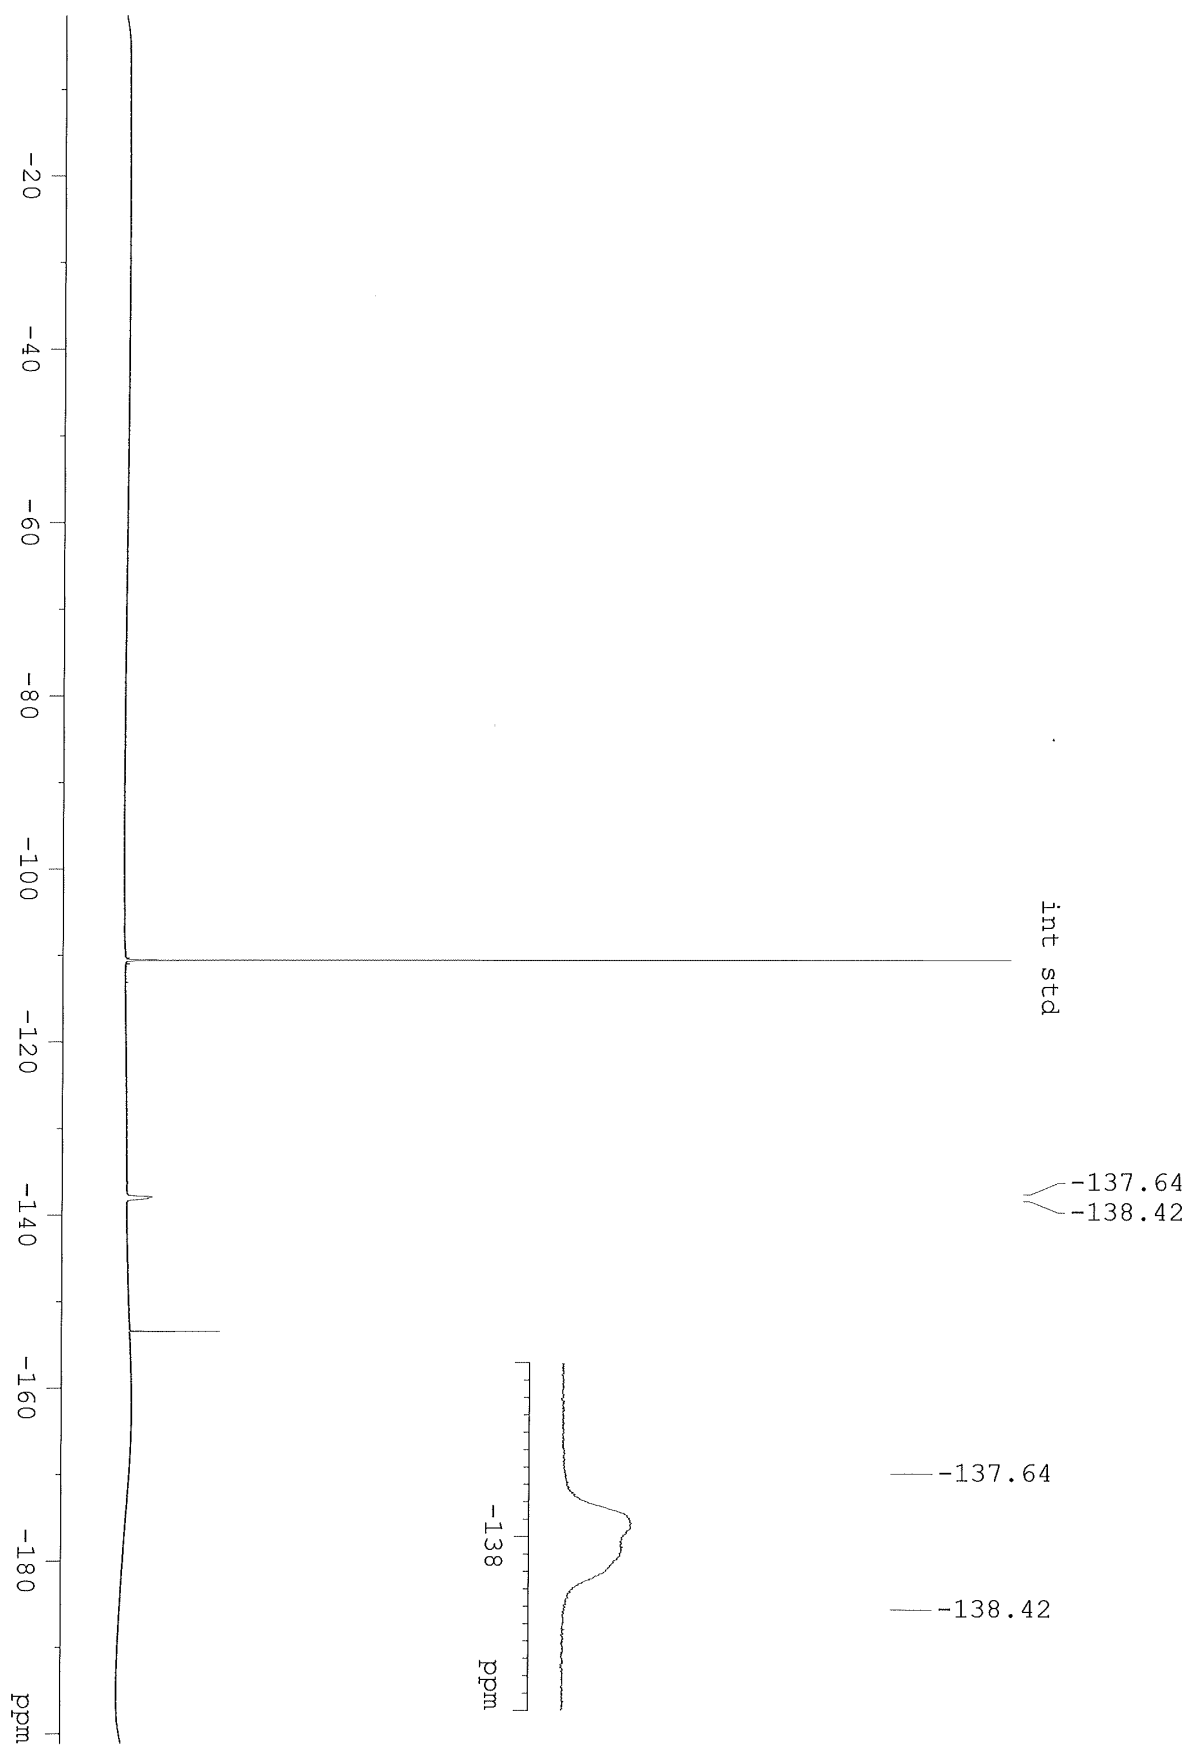



Compound 24 (11B NMR in MeCN-d<sub>3</sub>)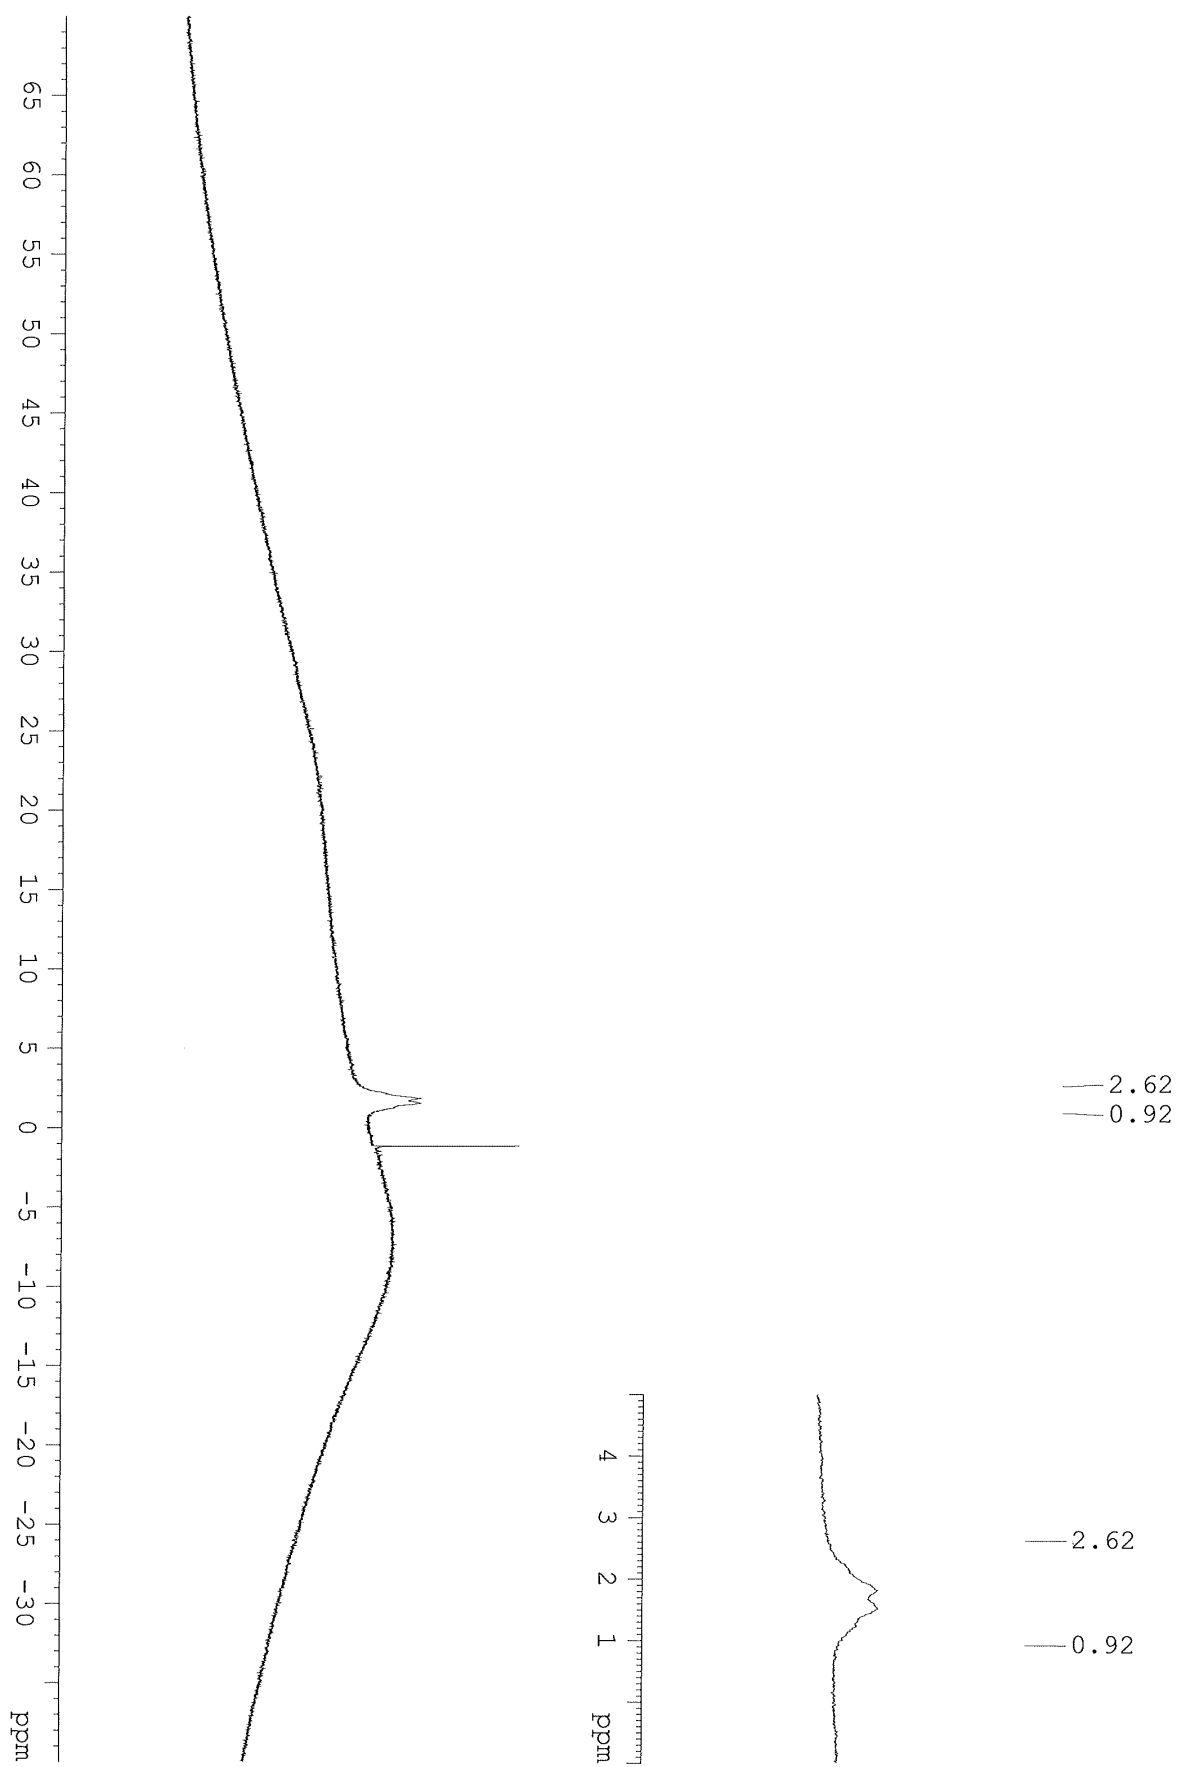

Compound 25 ( $^1\text{H}$  NMR in  $\text{MeCN-d}_3$ )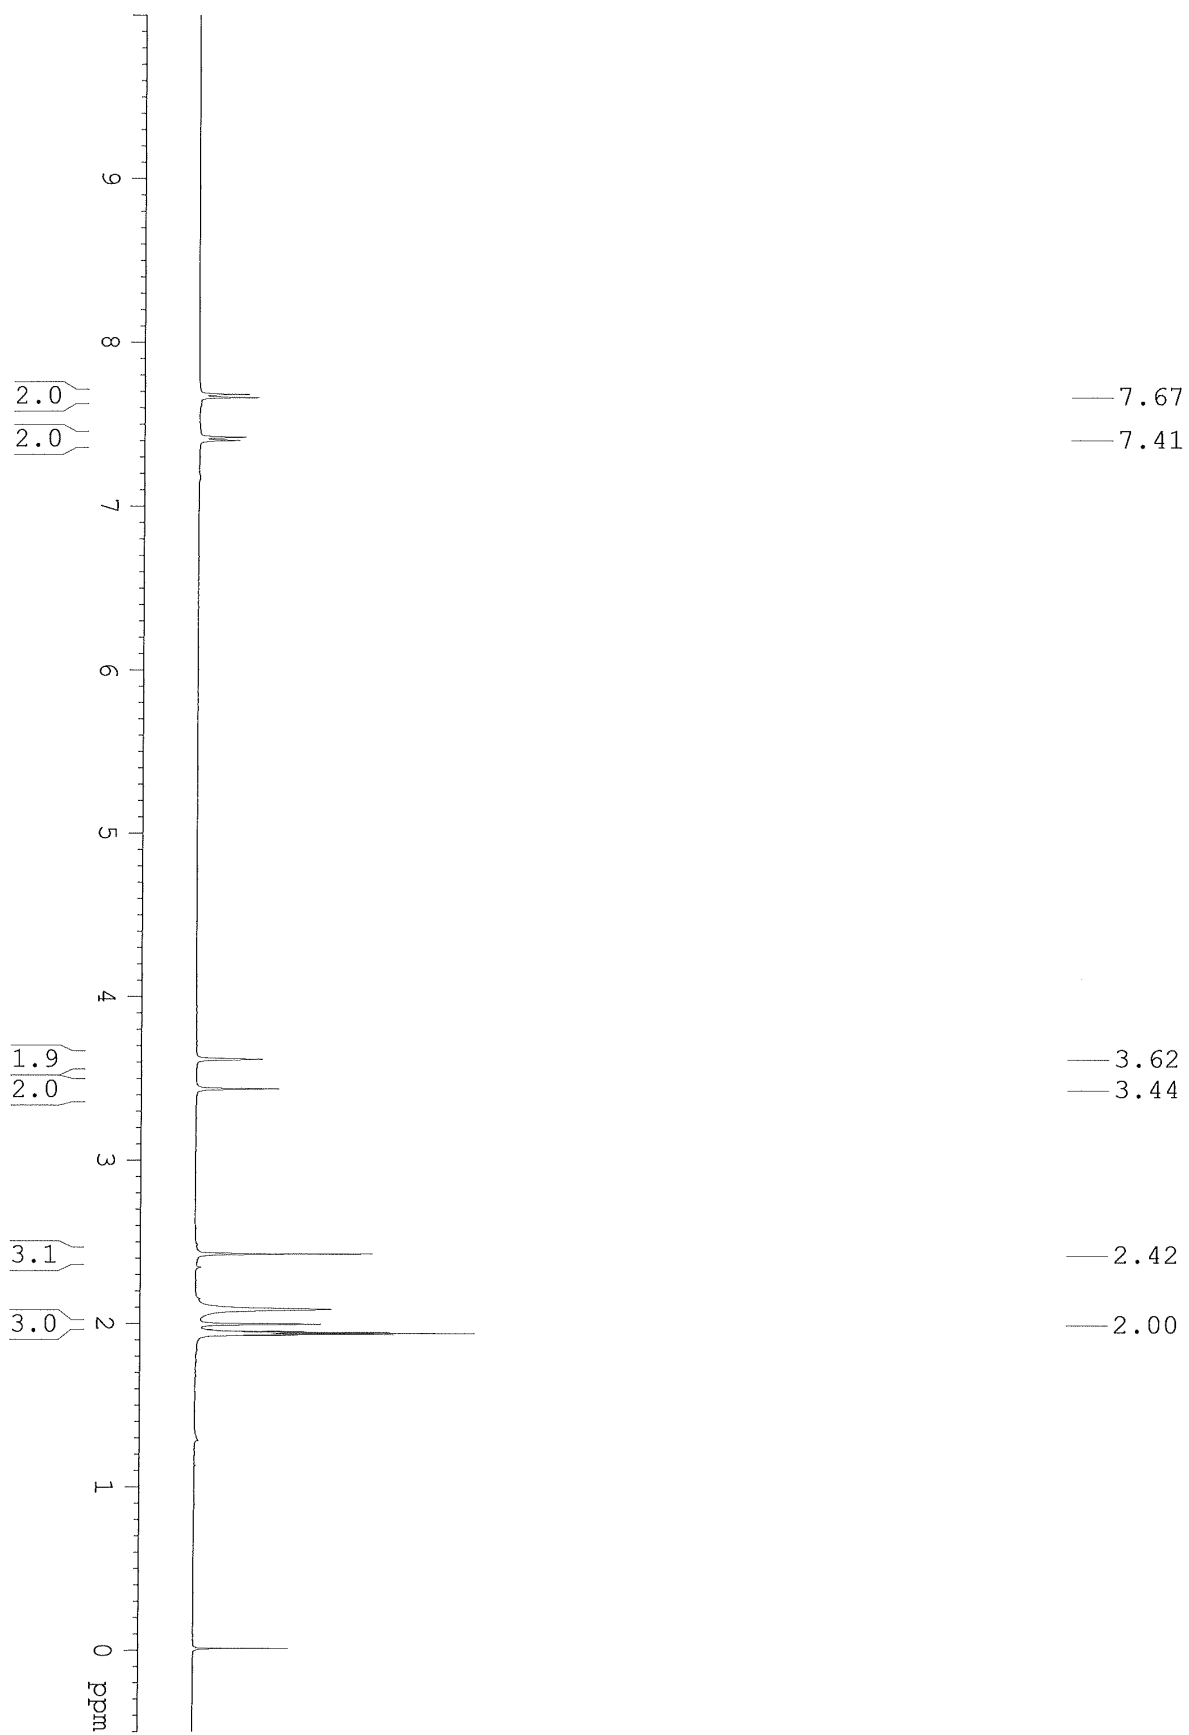

Compound 25 ( $^{13}\text{C}$  NMR in  $\text{DMSO-d}_6$ )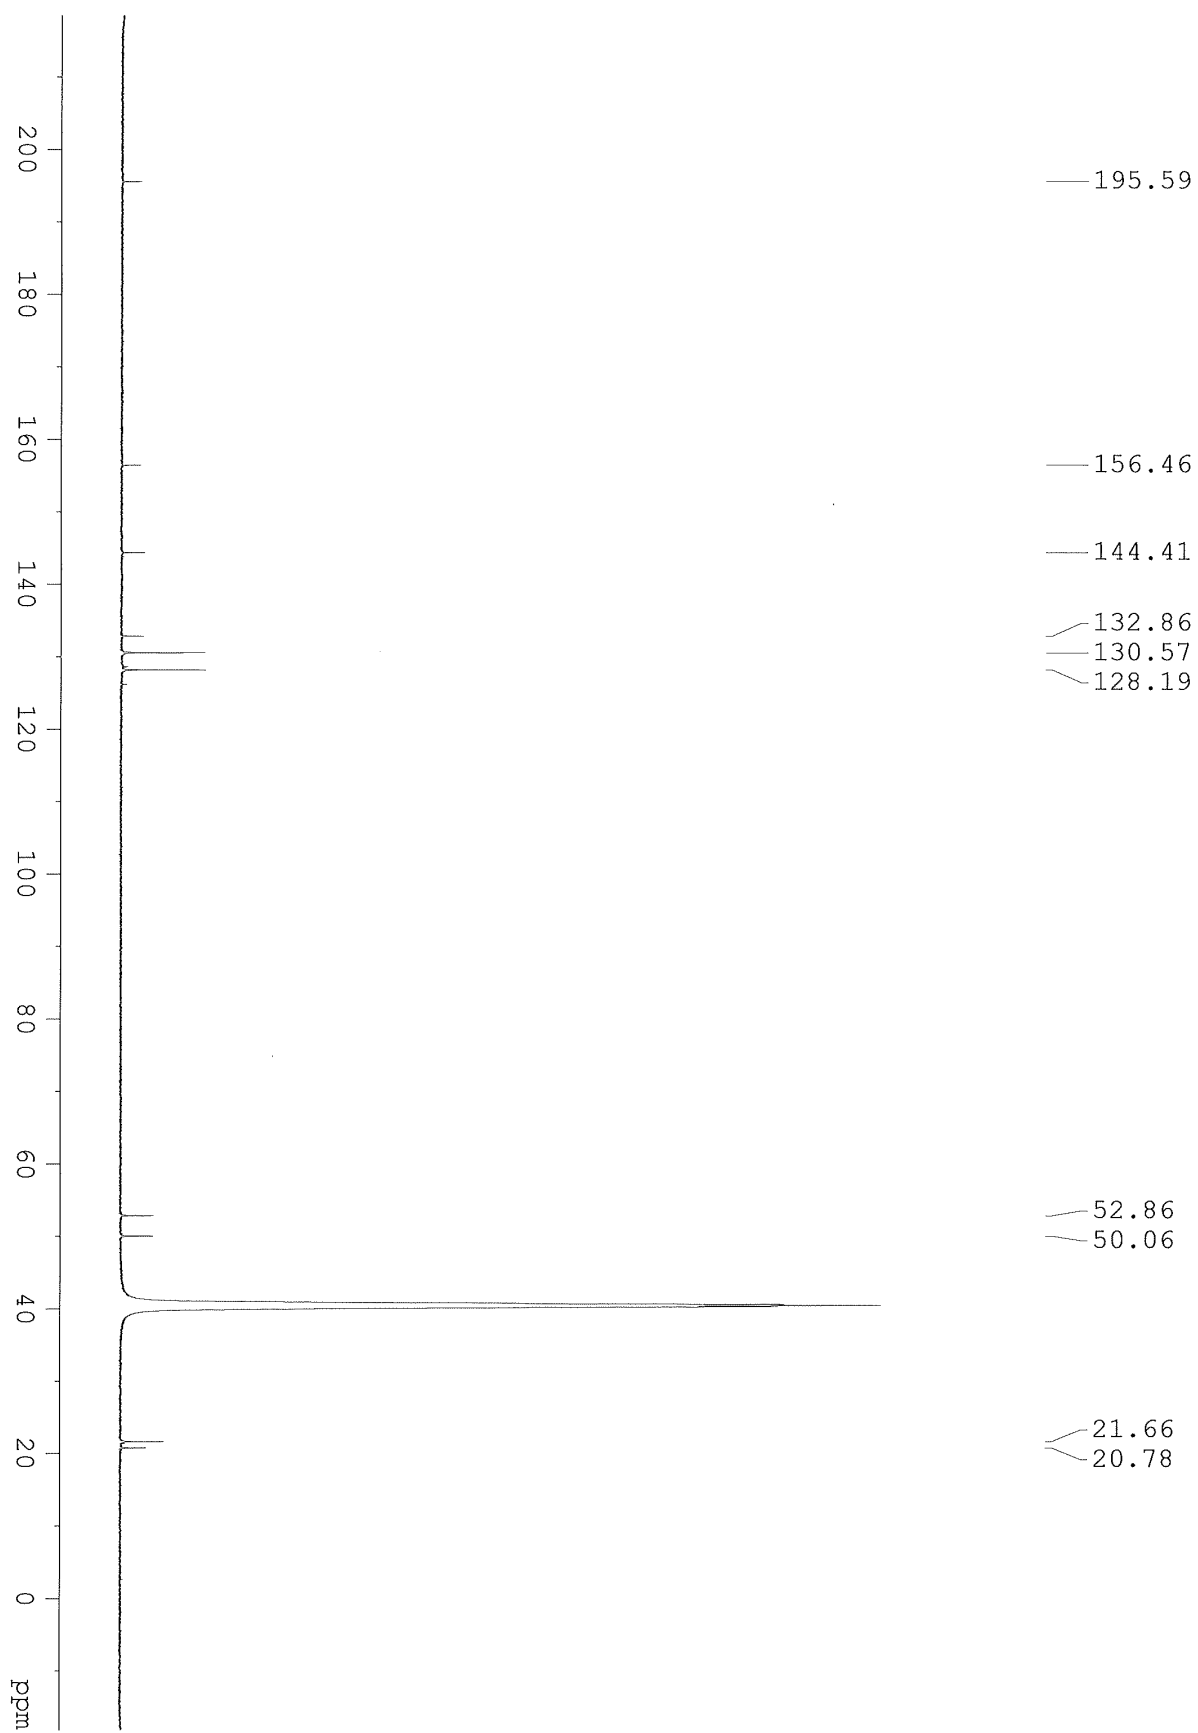

Compound 25 (19F NMR in MeCN-d3)

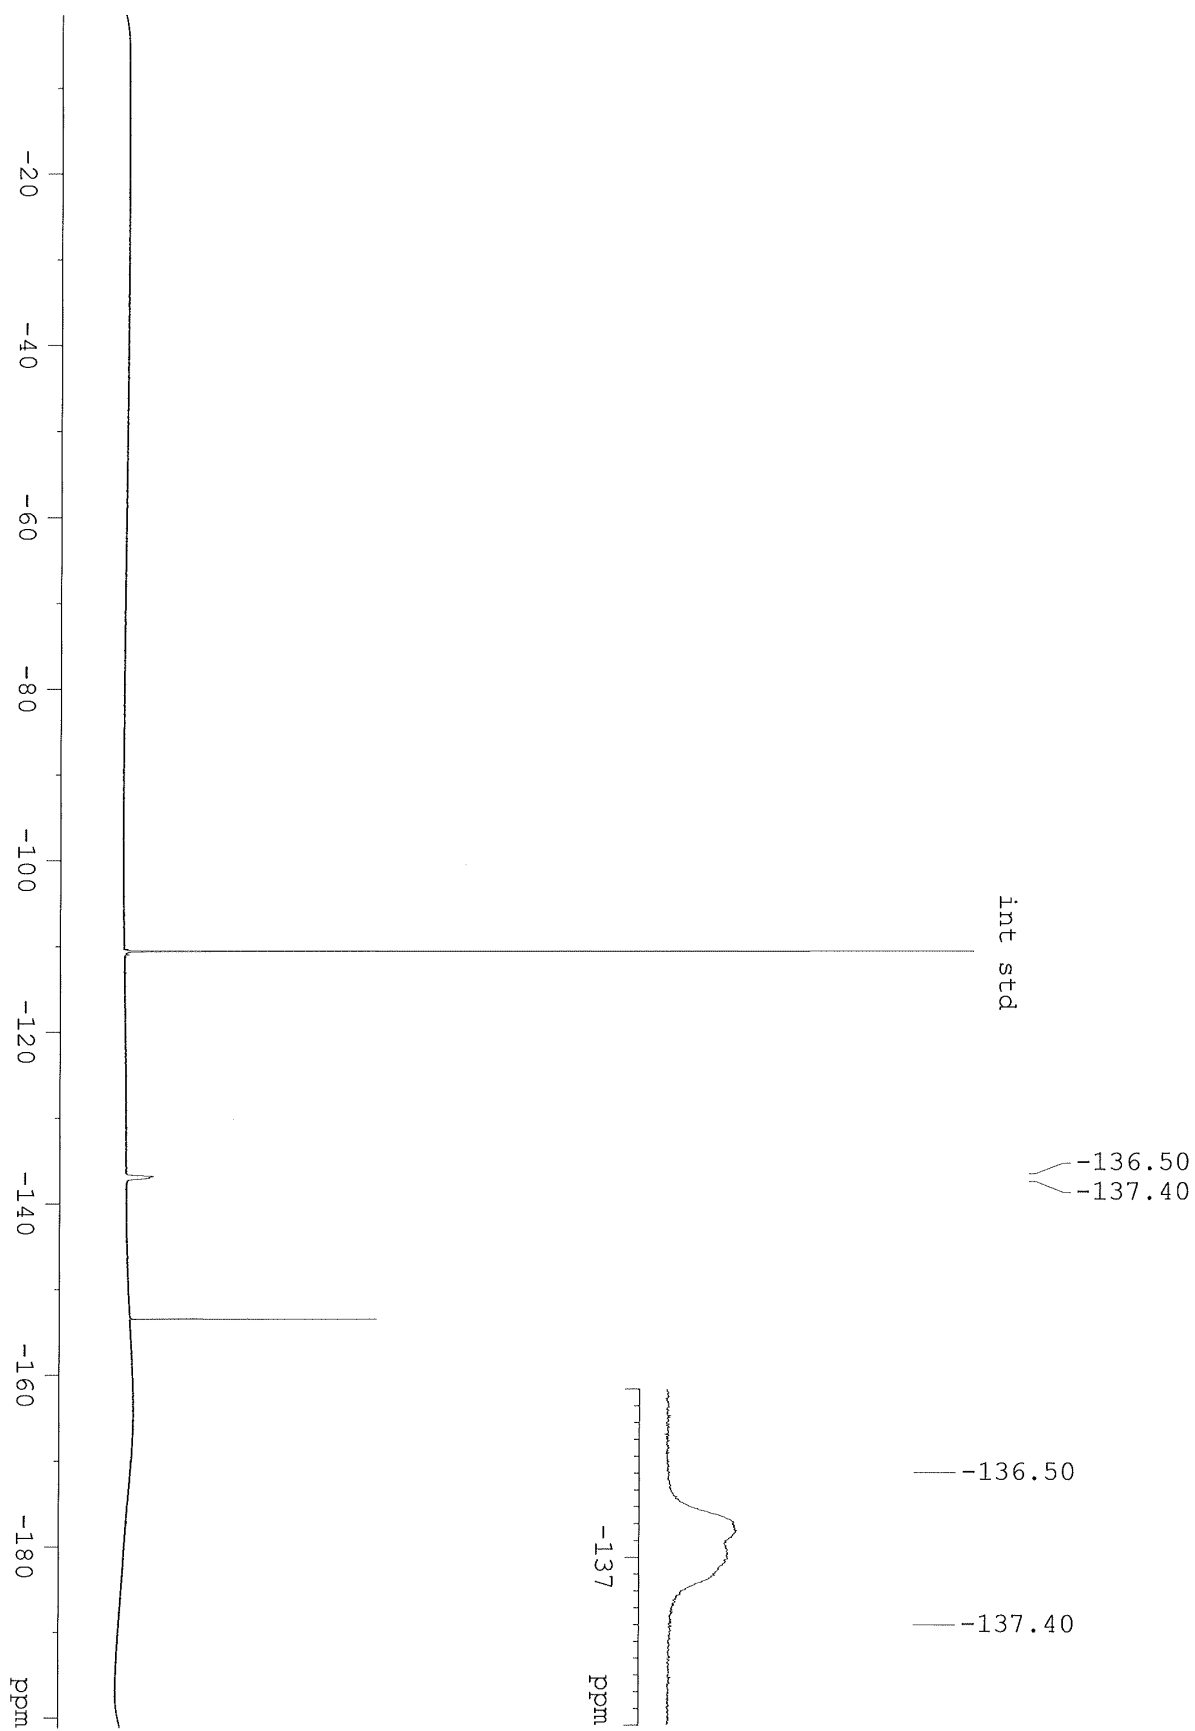

Compound 25 (11B NMR in MeCN-d<sub>3</sub>)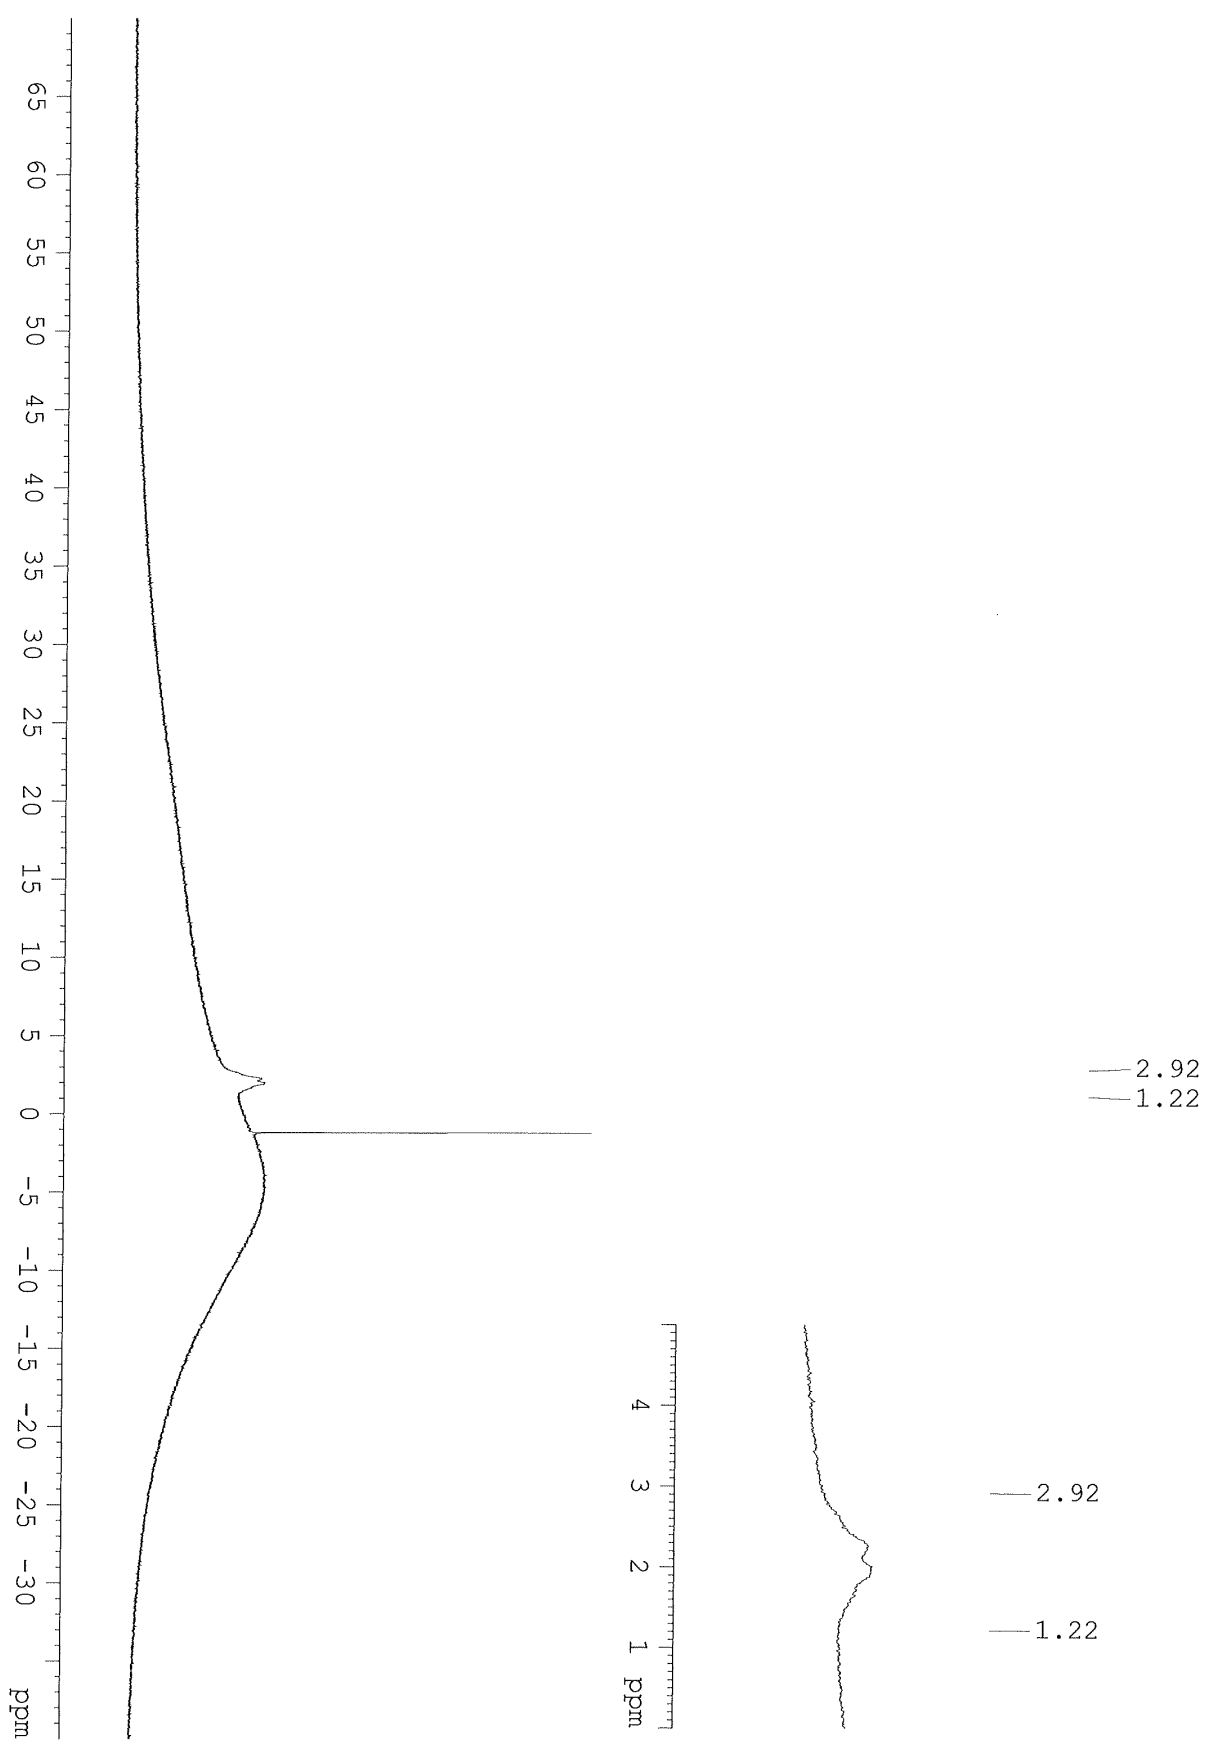

Compound 26 ( $^1\text{H}$  NMR in  $\text{DMSO-d}_6$ )

7.92  
7.84  
7.83  
7.76  
7.55  
7.44

— 4.44

— 3.97

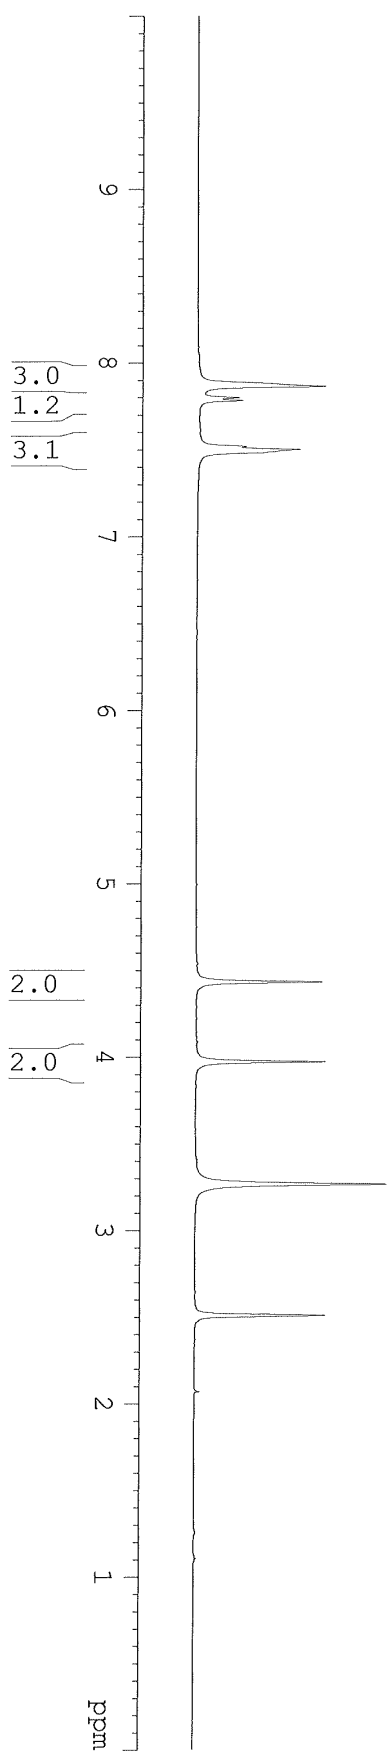

Compound 26 ( $^{13}\text{C}$  NMR in  $\text{DMSO-d}_6$ )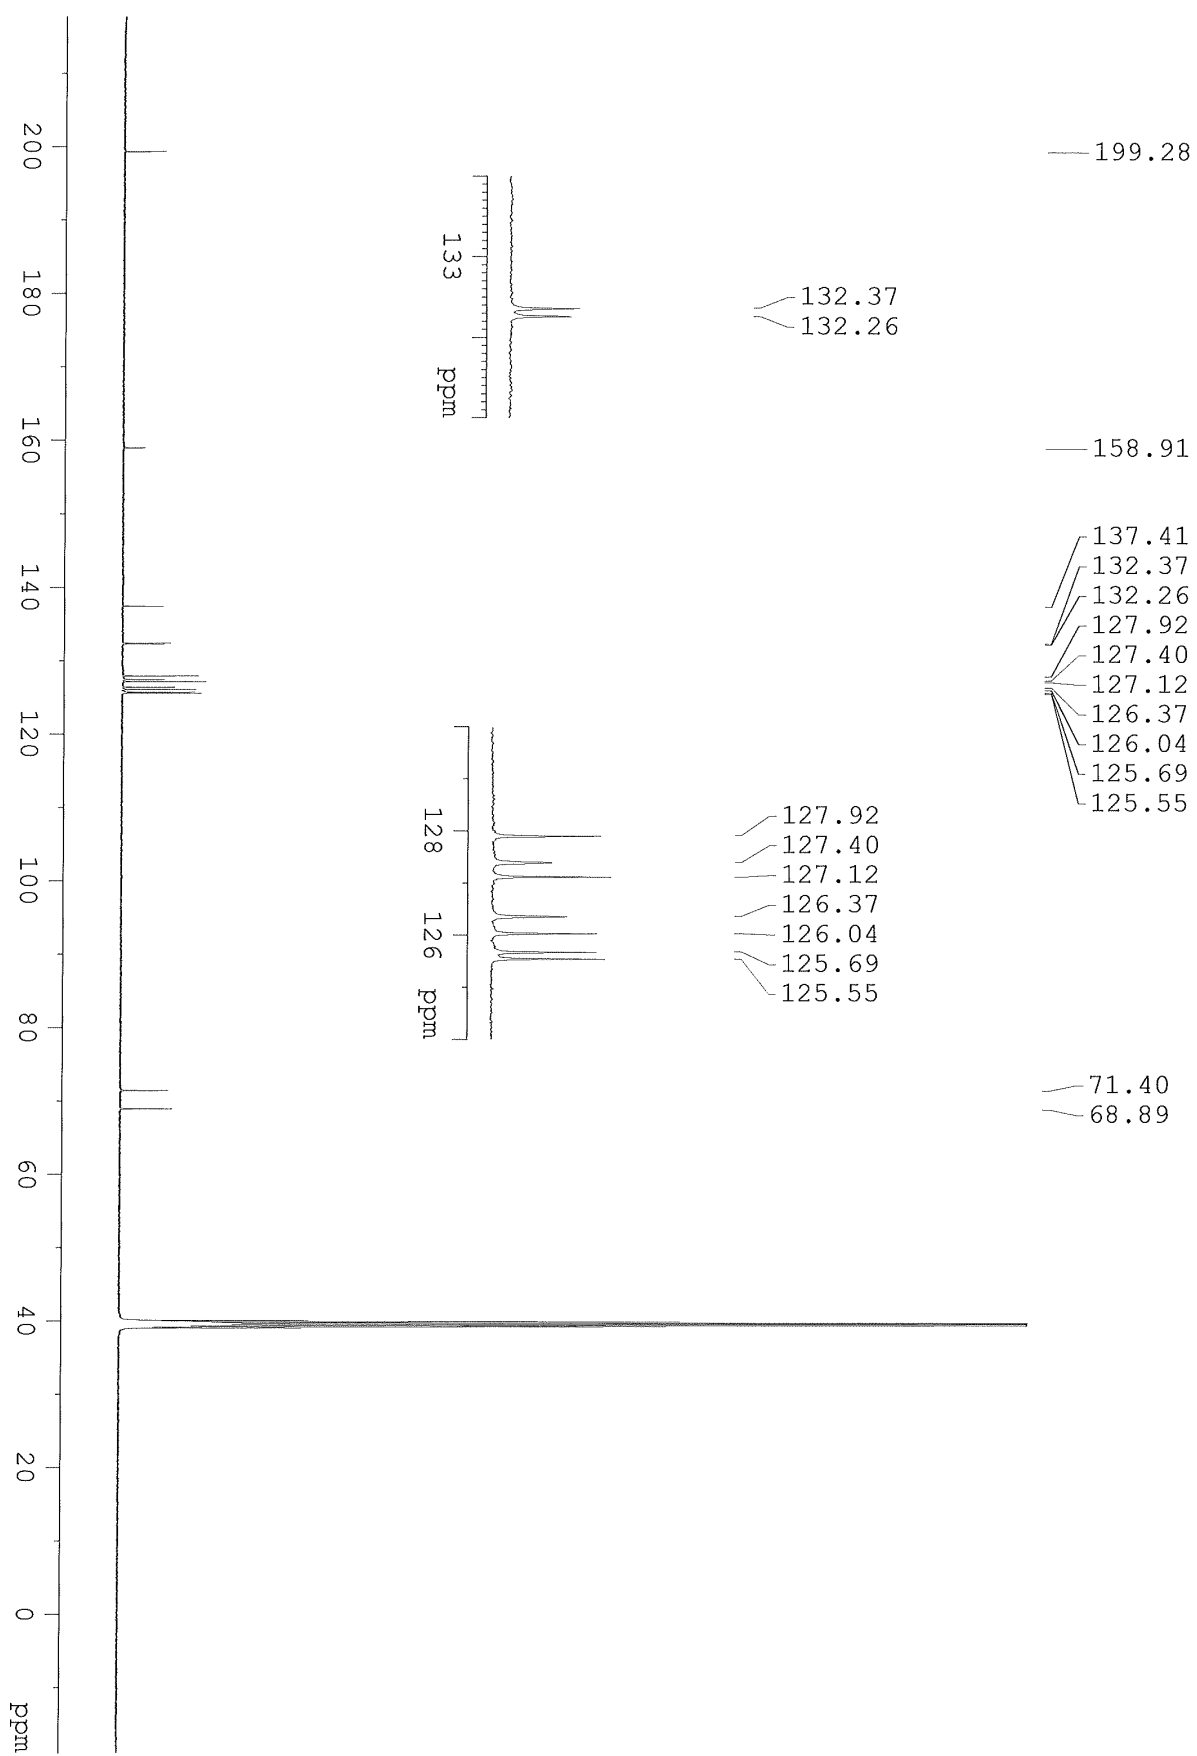

Compound 26 (19F NMR in MeCN-d3)

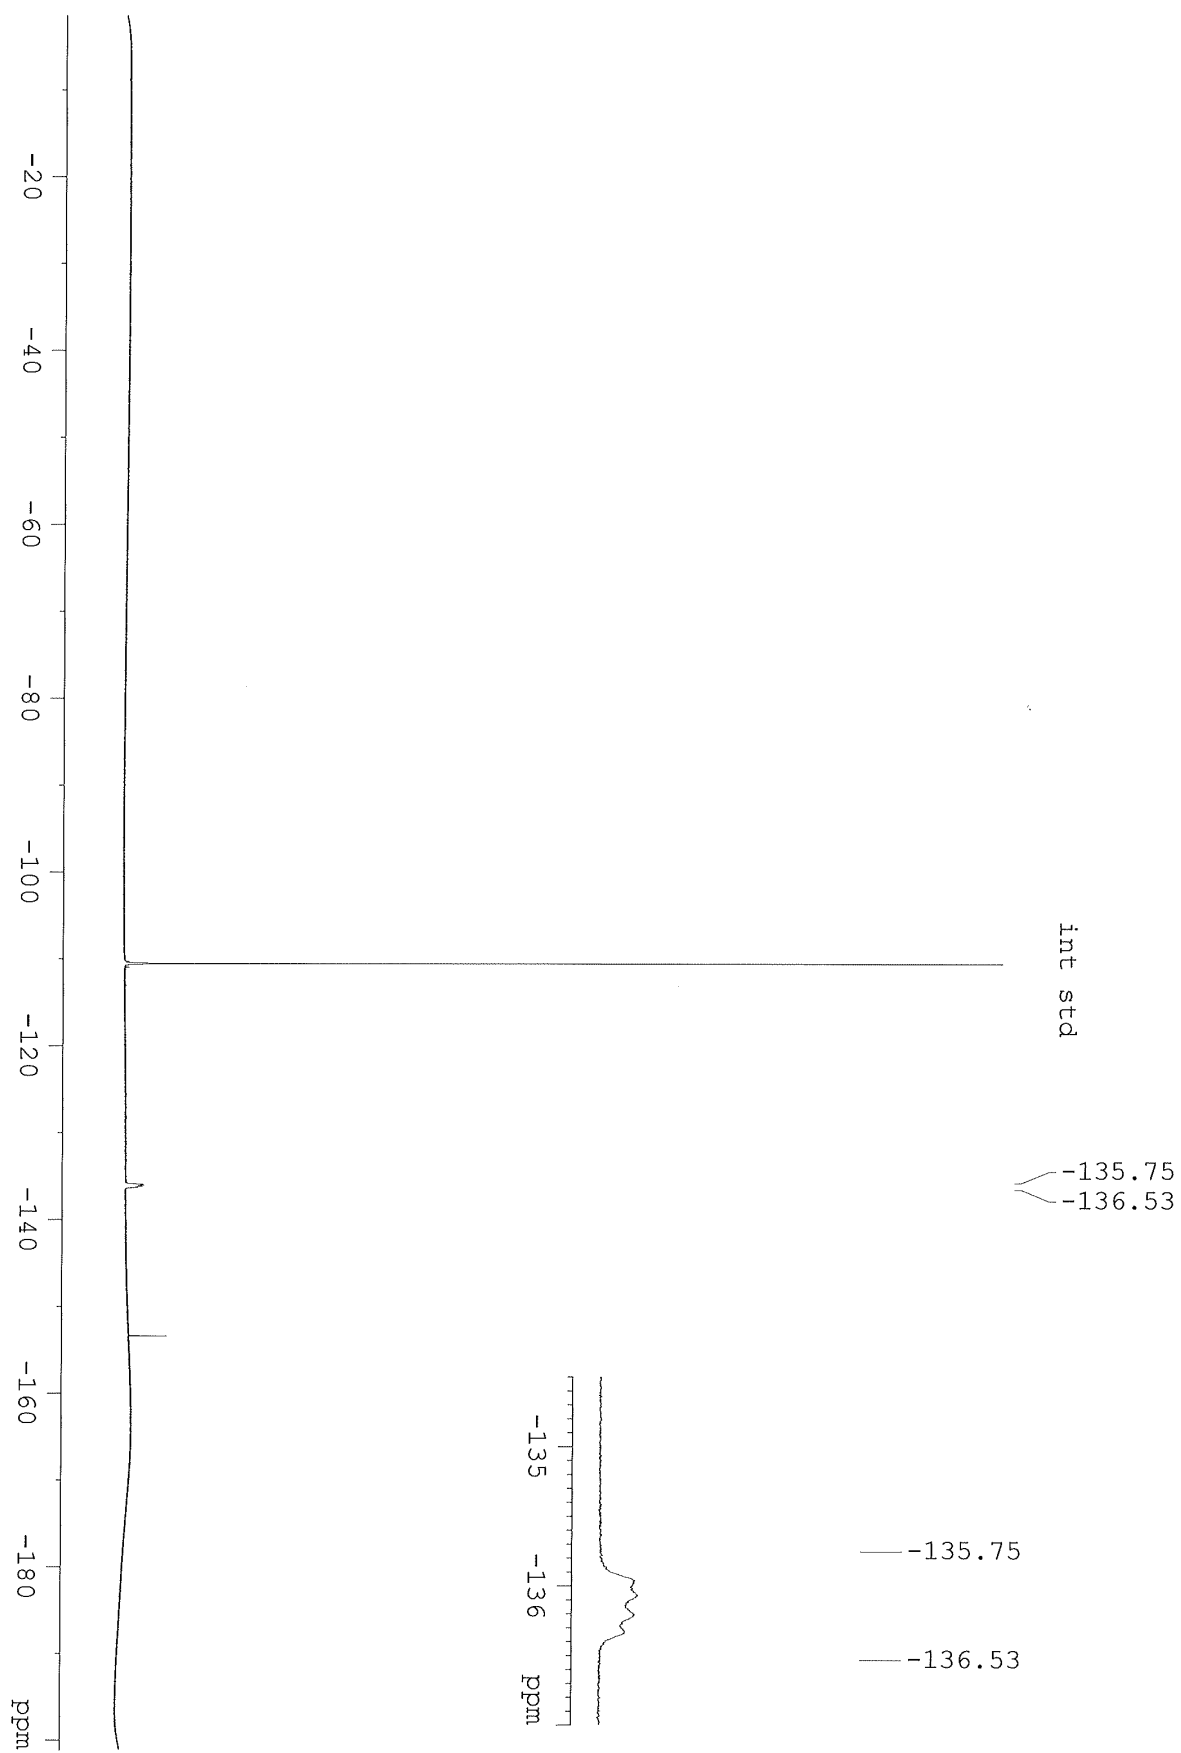



Compound 26 (11B NMR in MeCN-d<sub>3</sub>)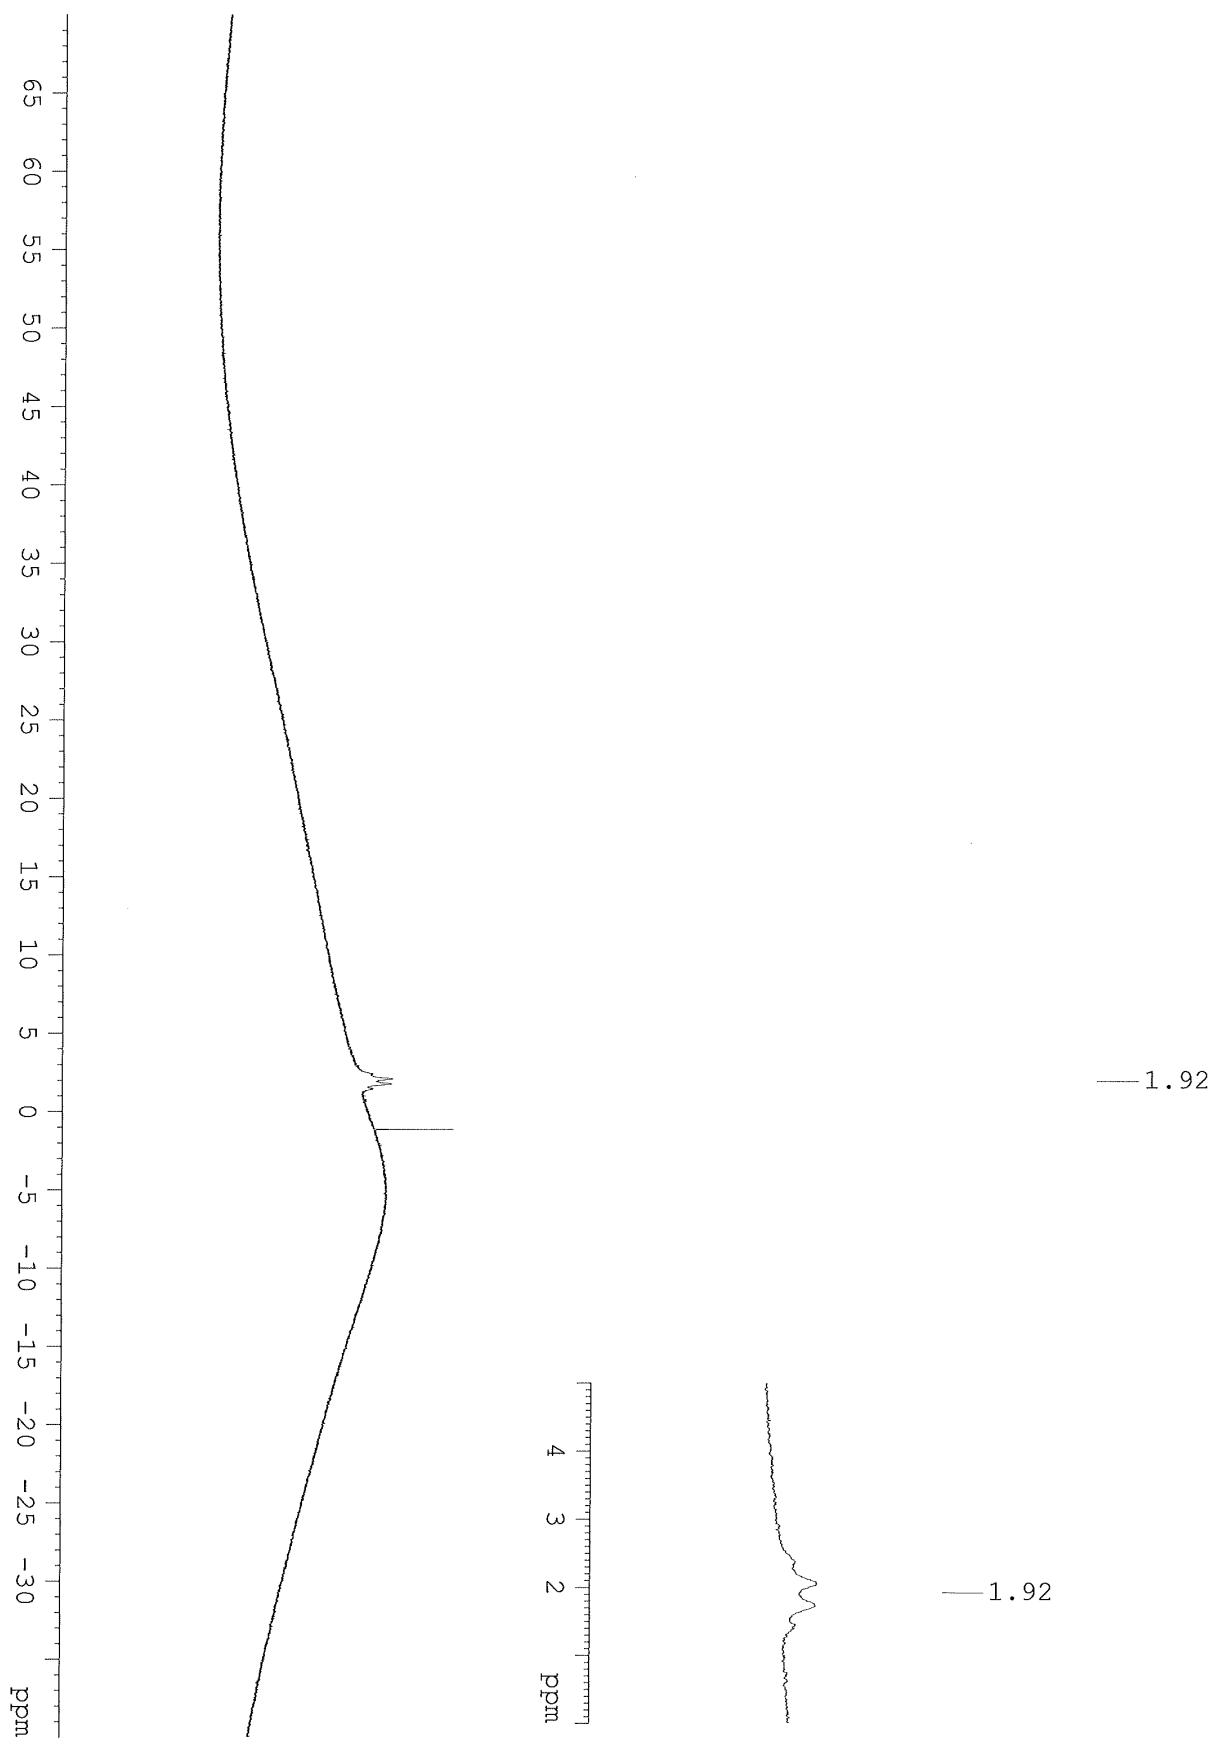

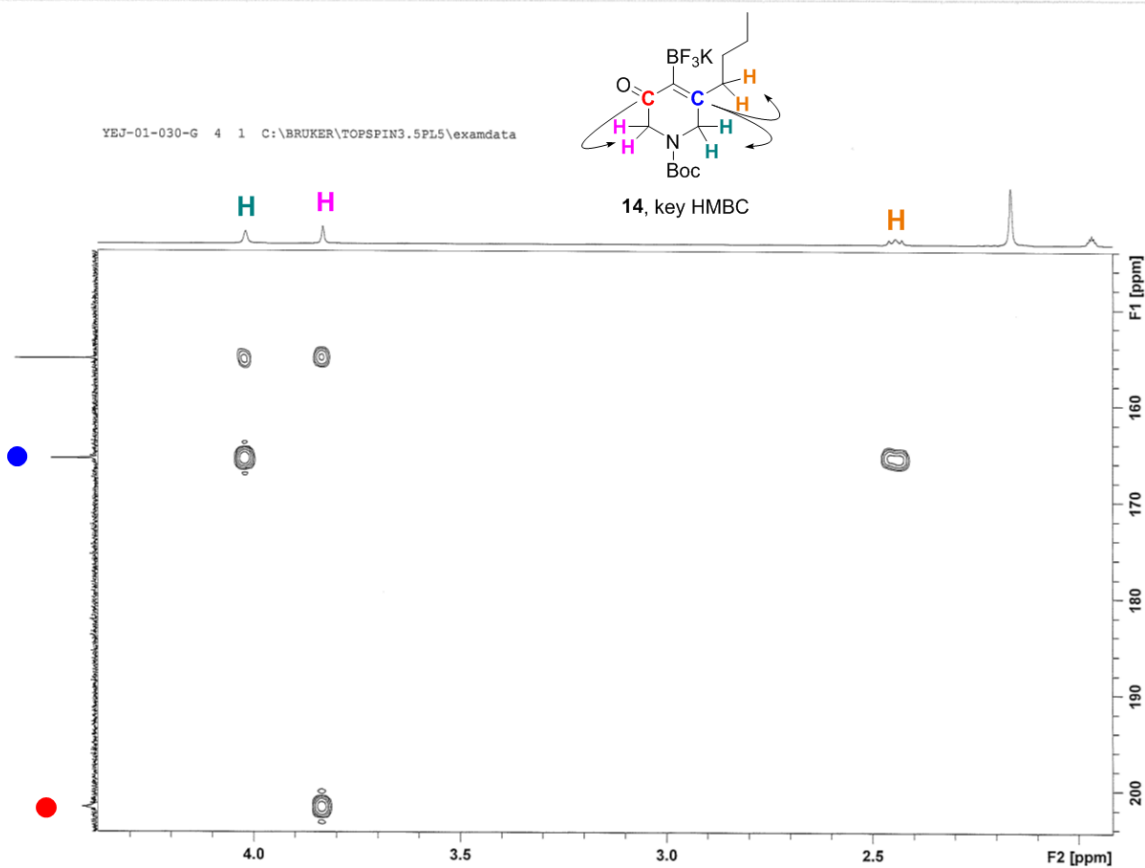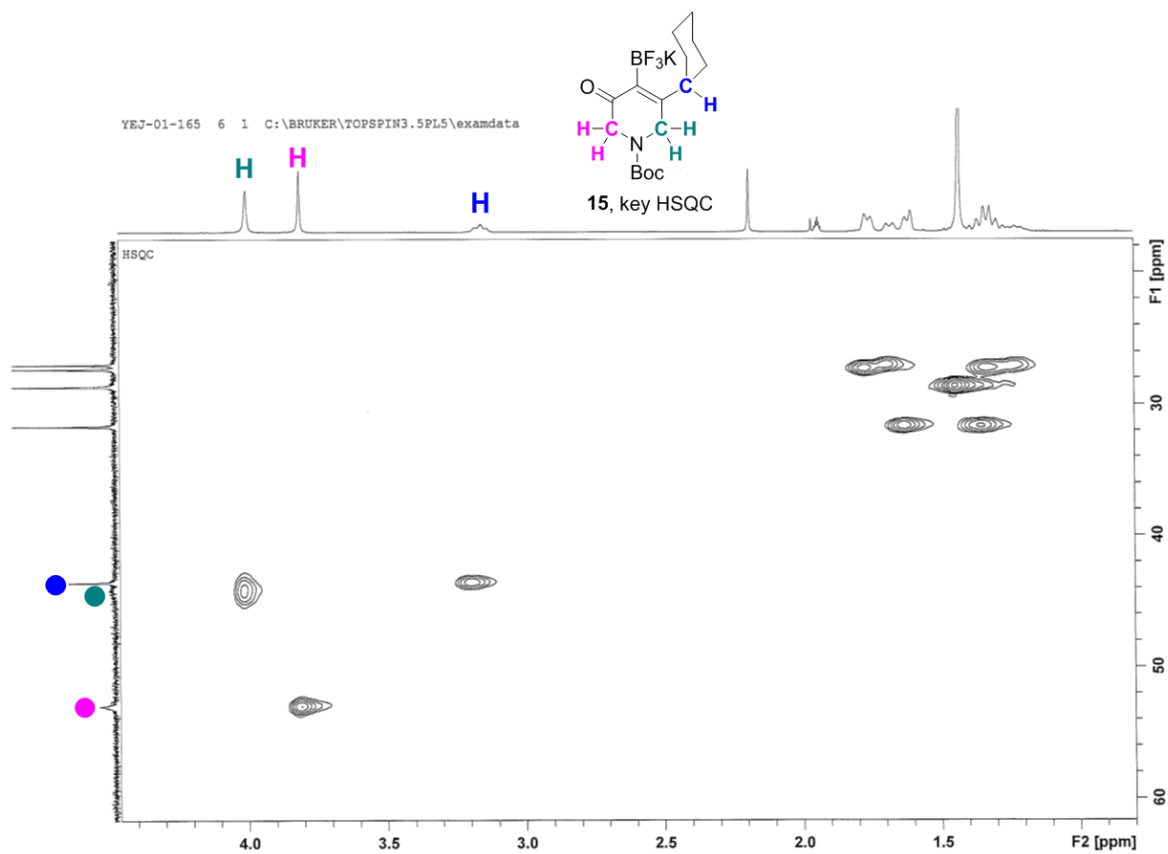

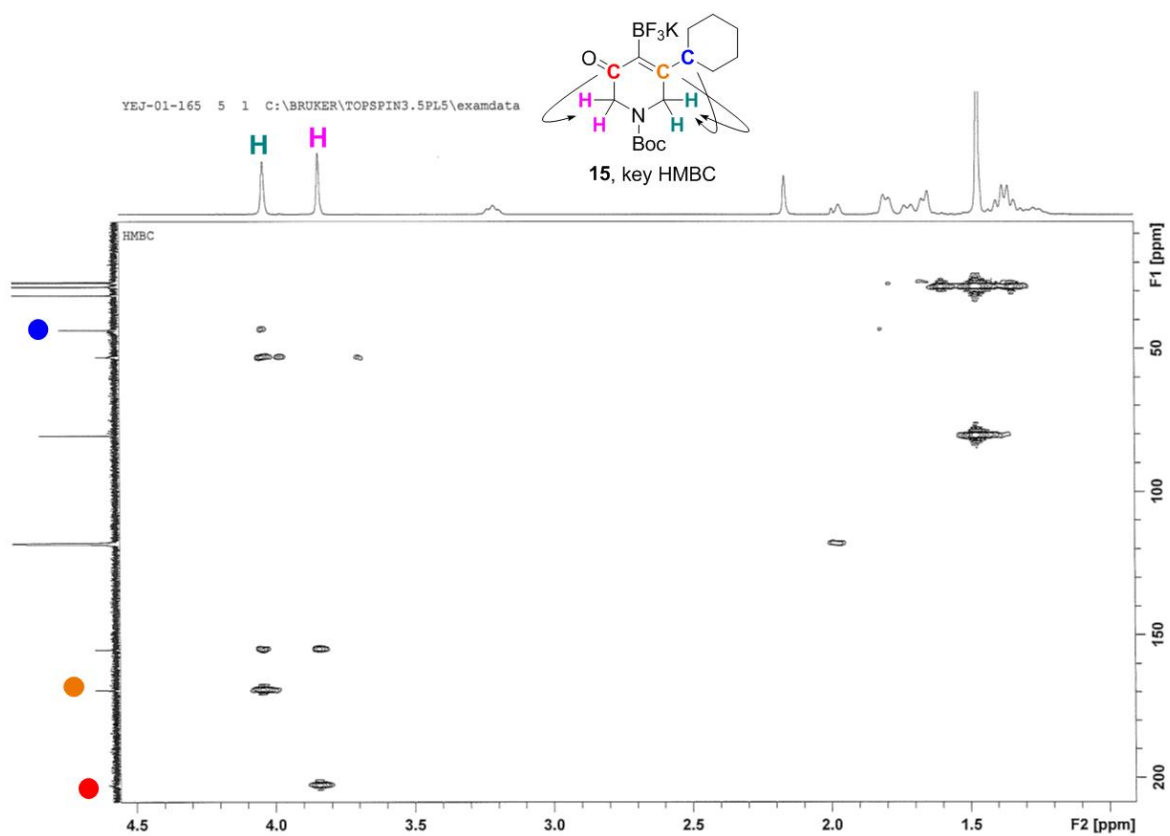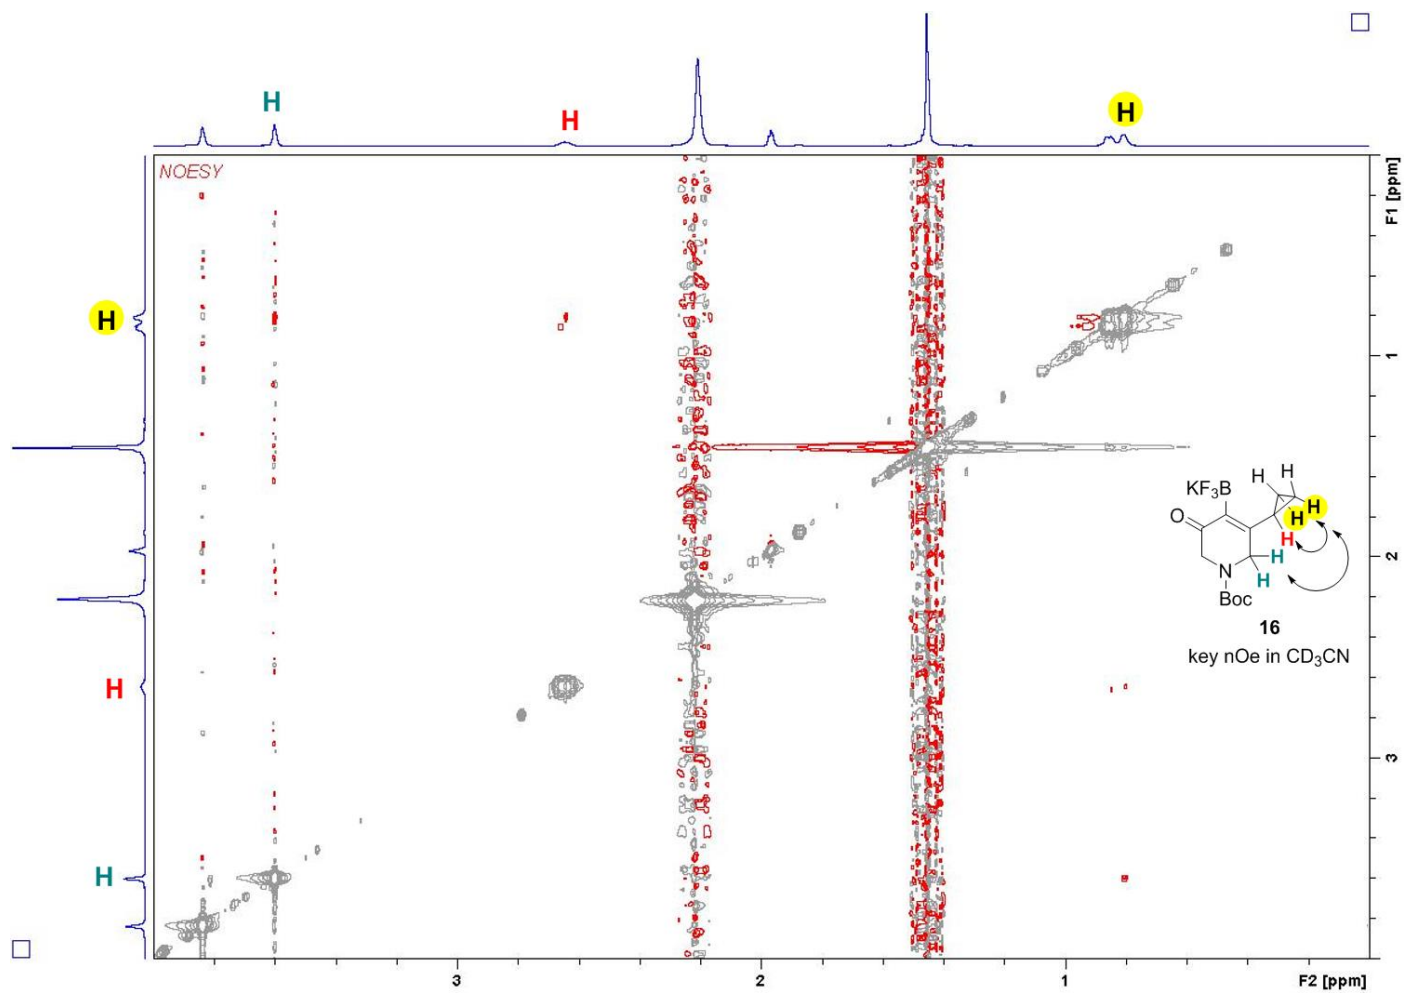

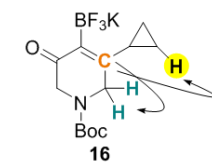key HMBC in DMSO-d<sub>6</sub>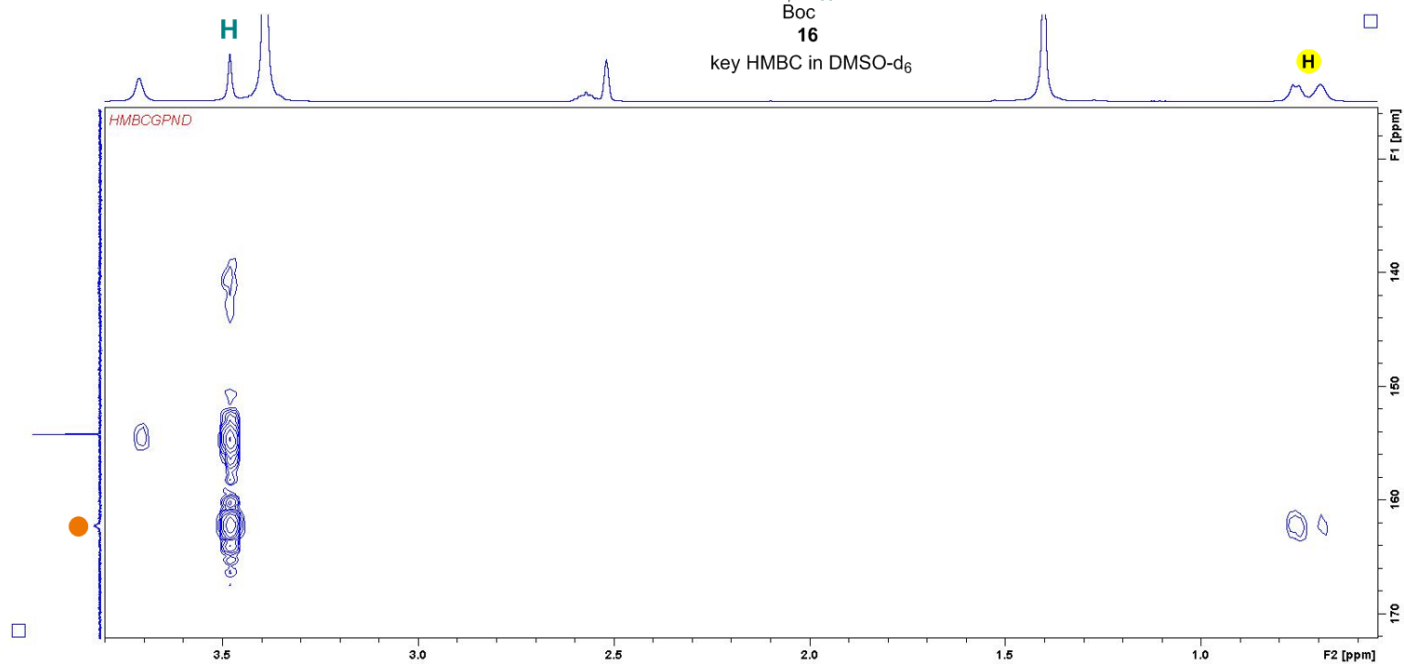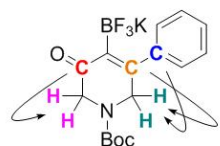

18, key HMBC

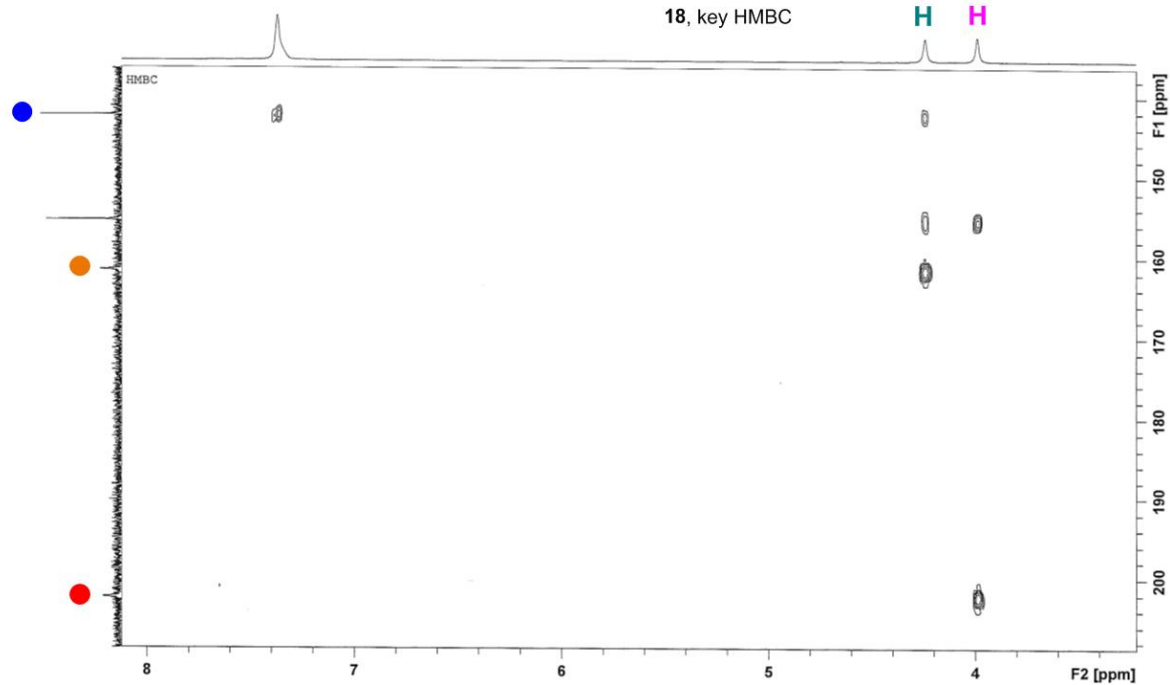

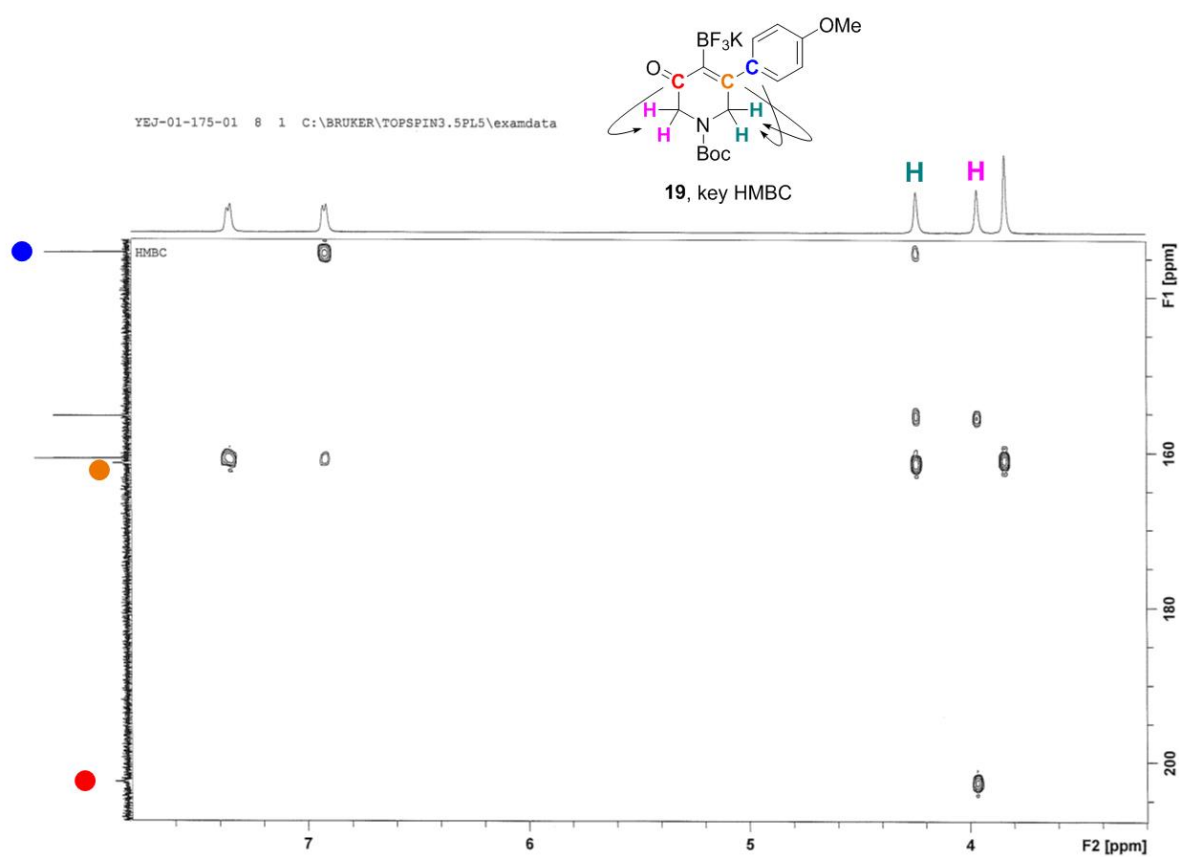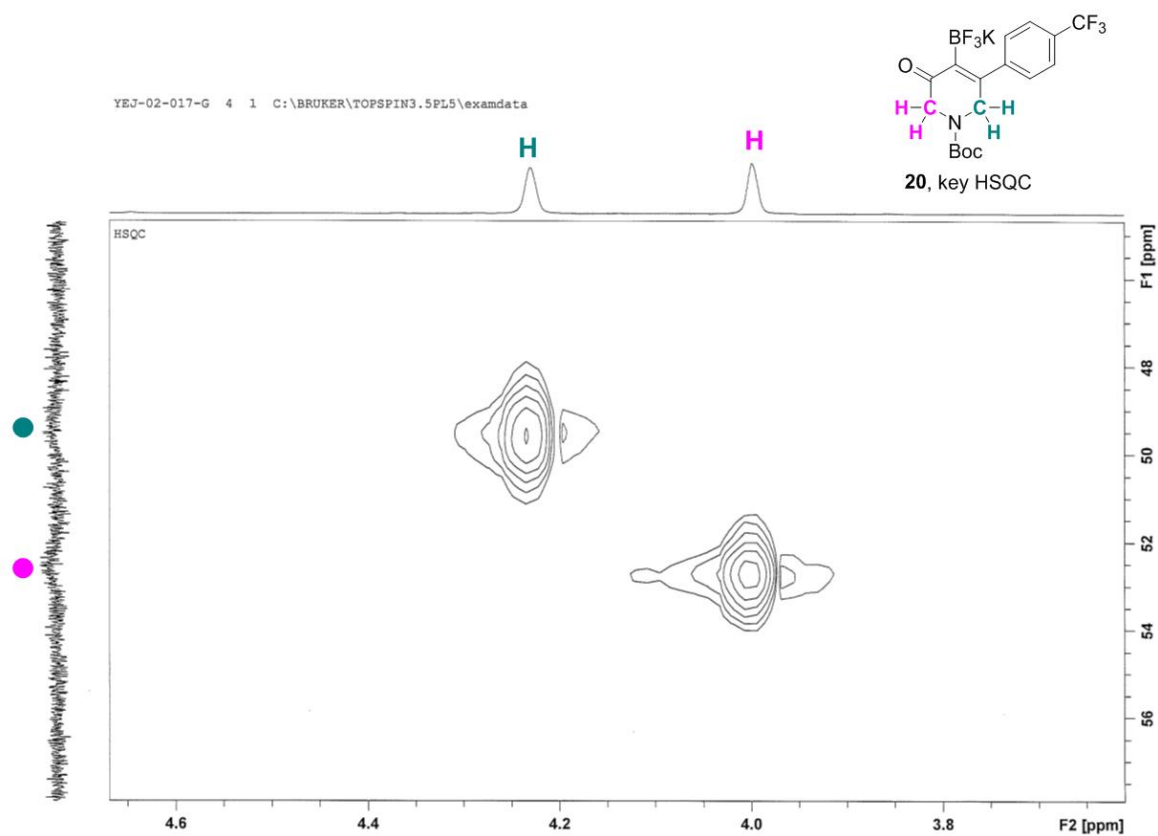

YEJ-02-017-G 3 1 C:\BRUKER\TOPSPIN3.5PL5\examdata

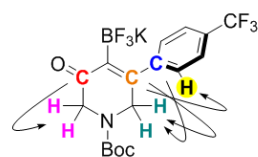

20, key HMBC

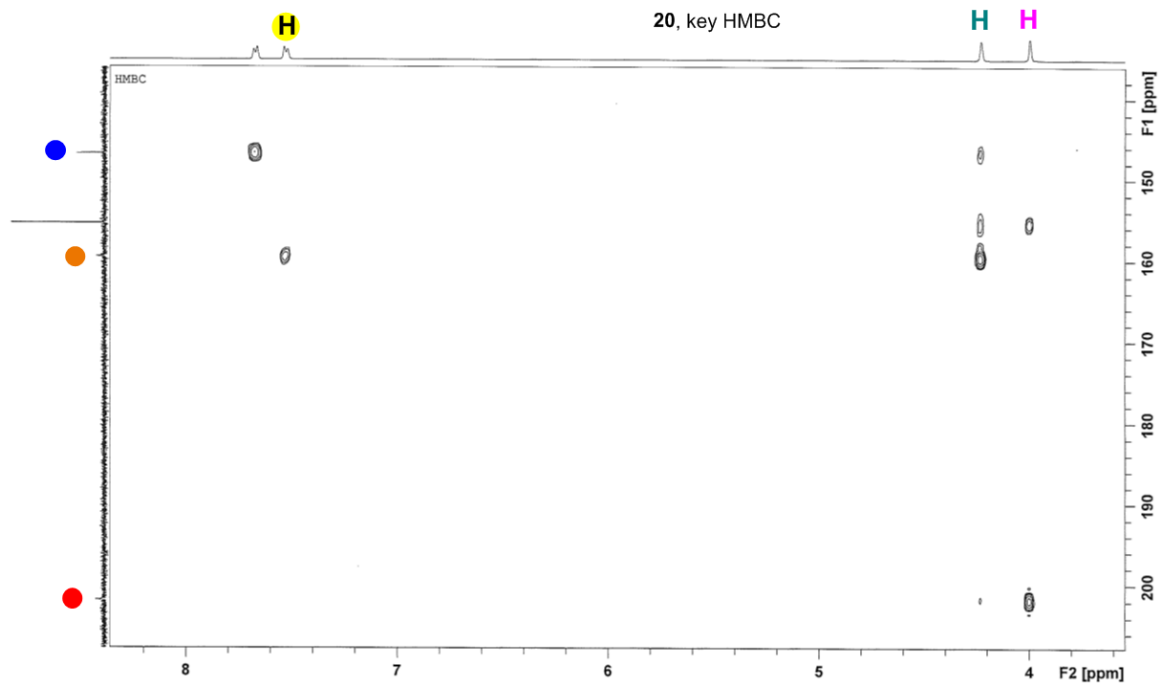

YEJ-01-174-G 5 1 C:\BRUKER\TOPSPIN3.5PL5\examdata

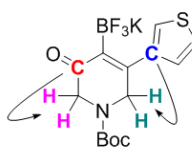

21, key HMBC

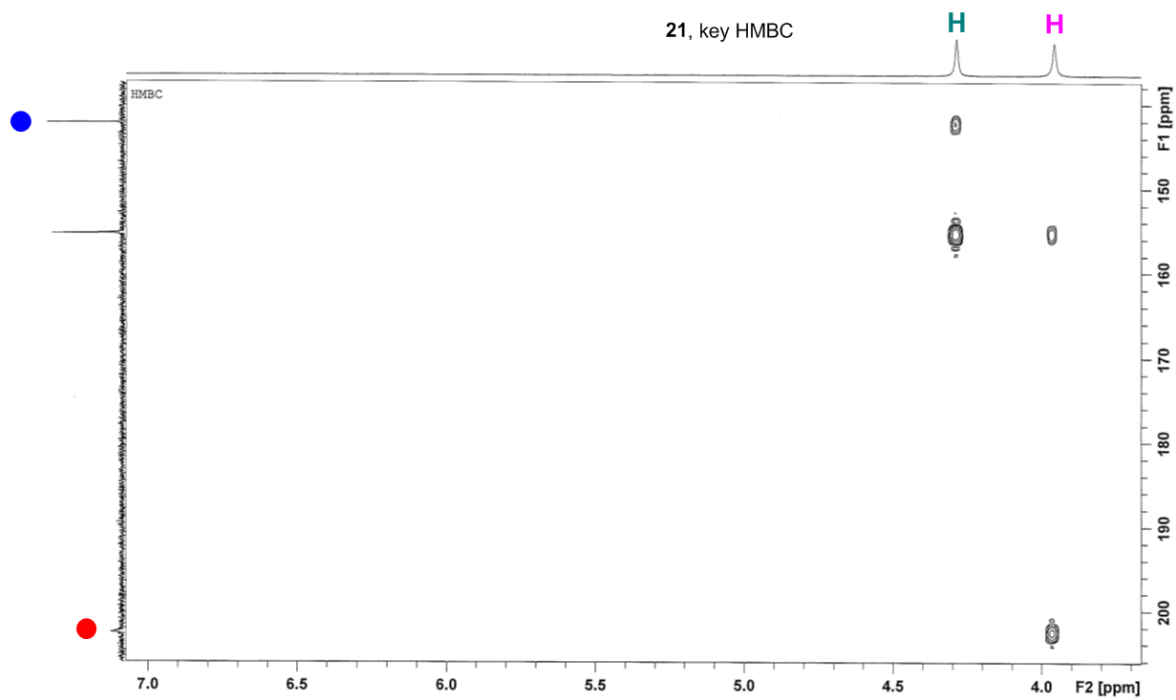

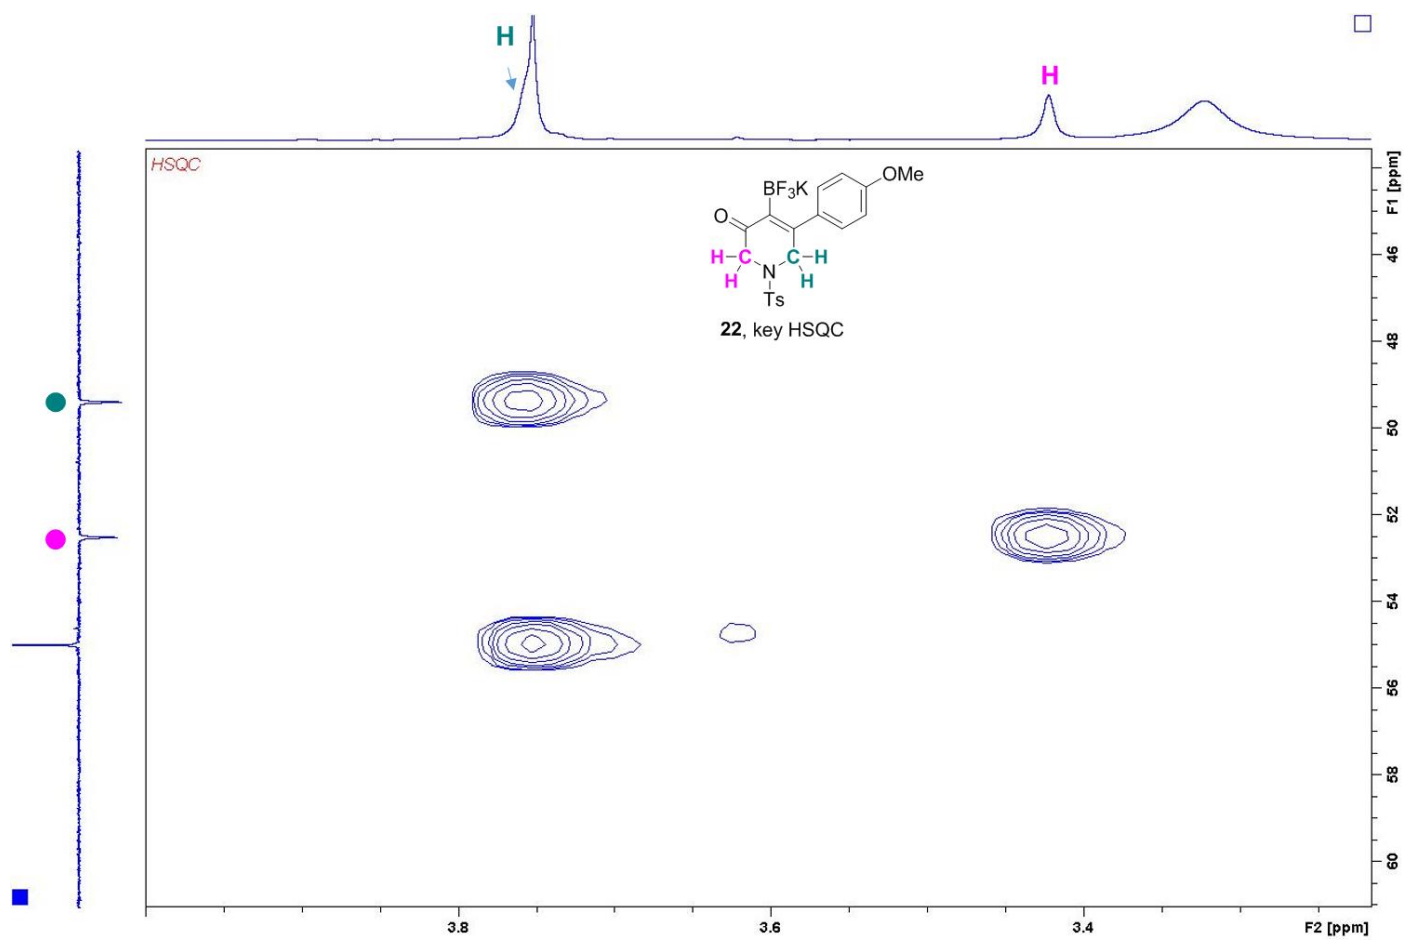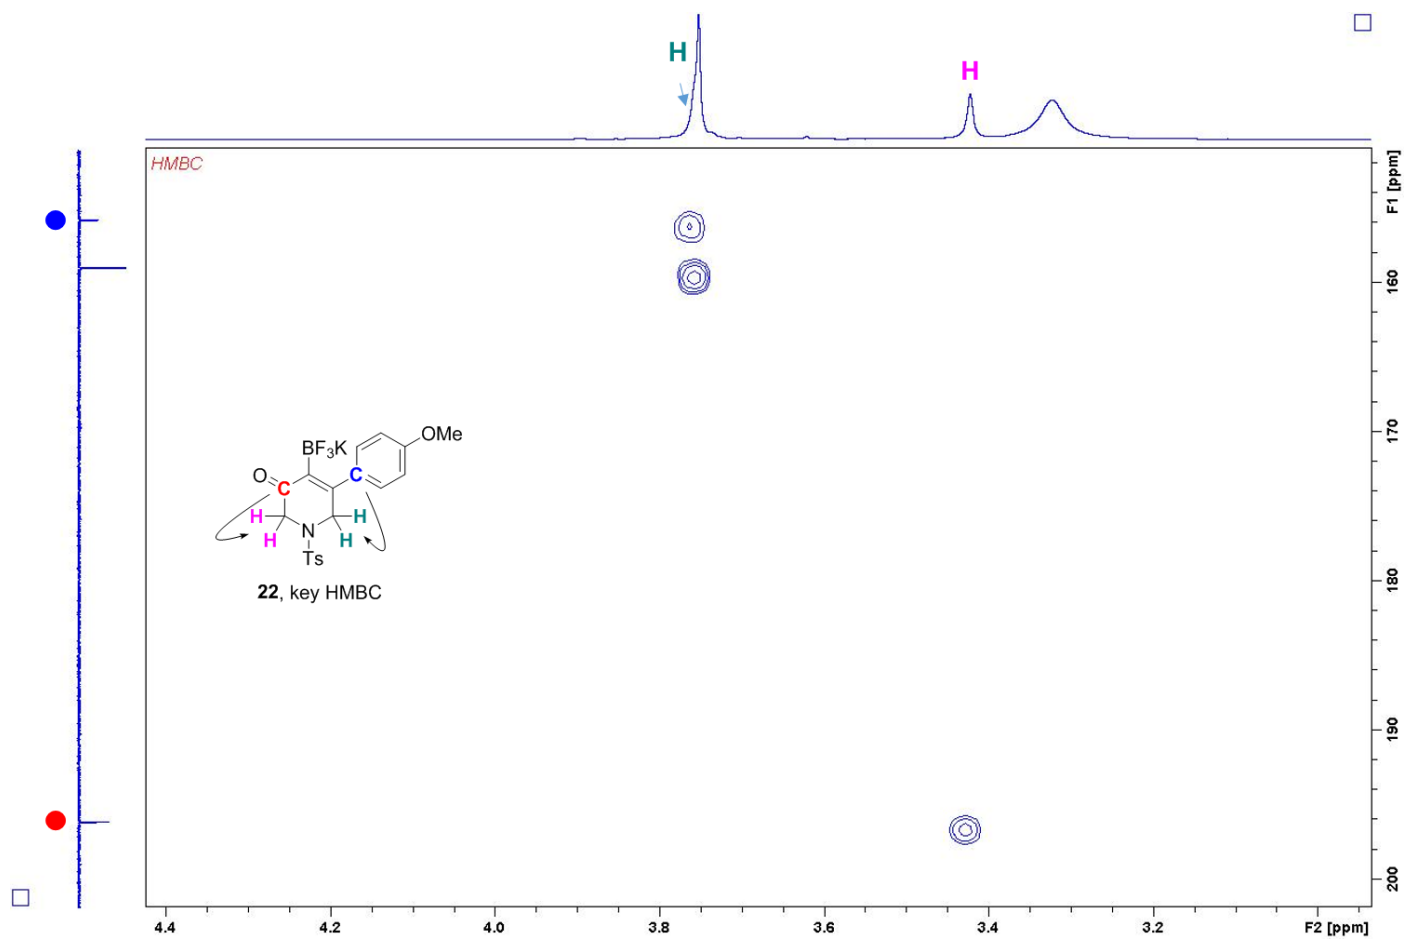

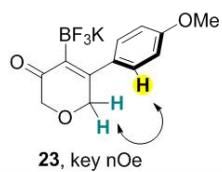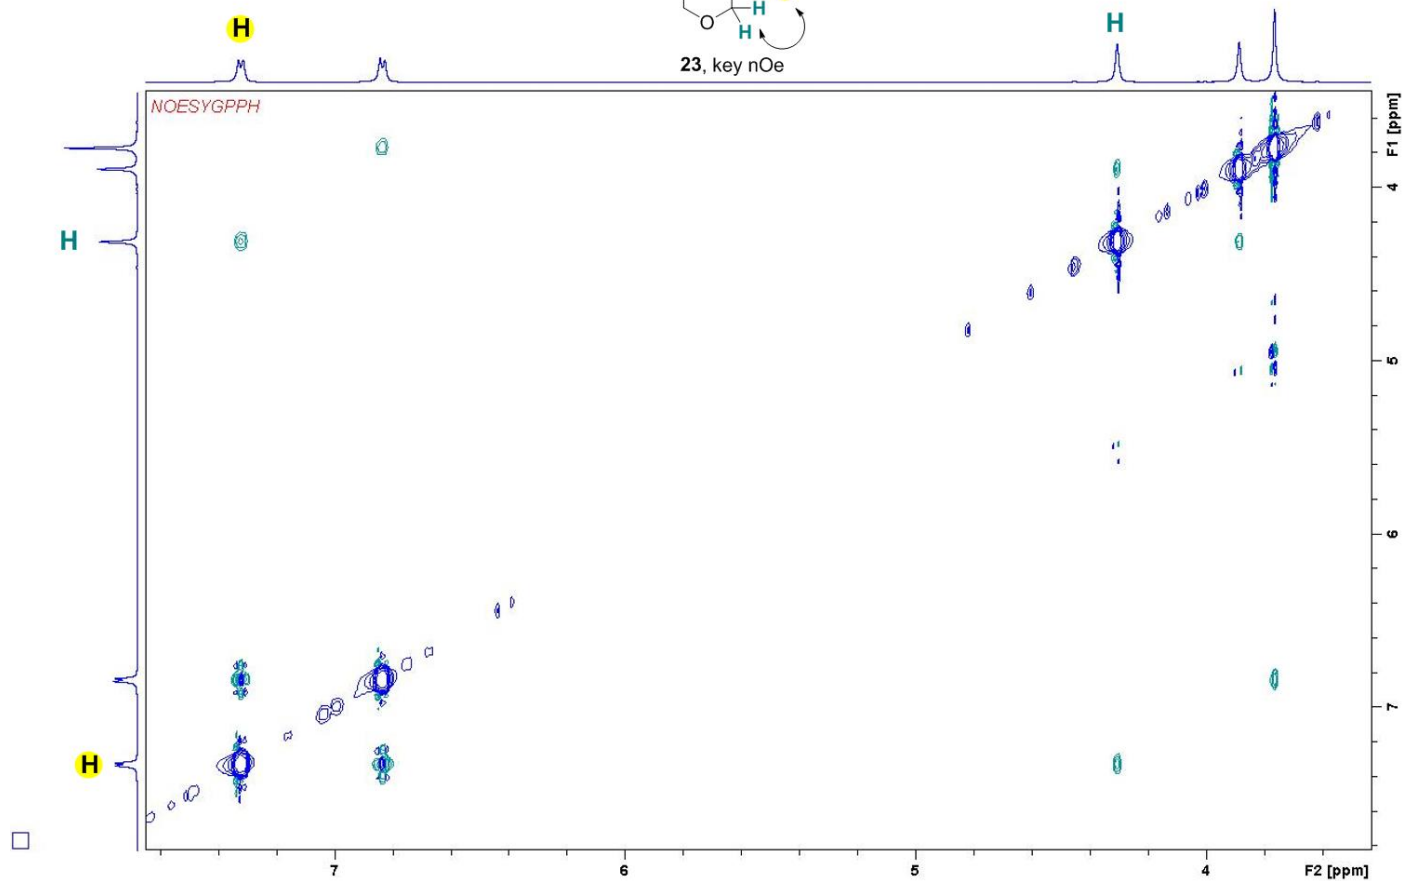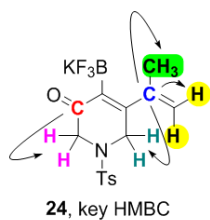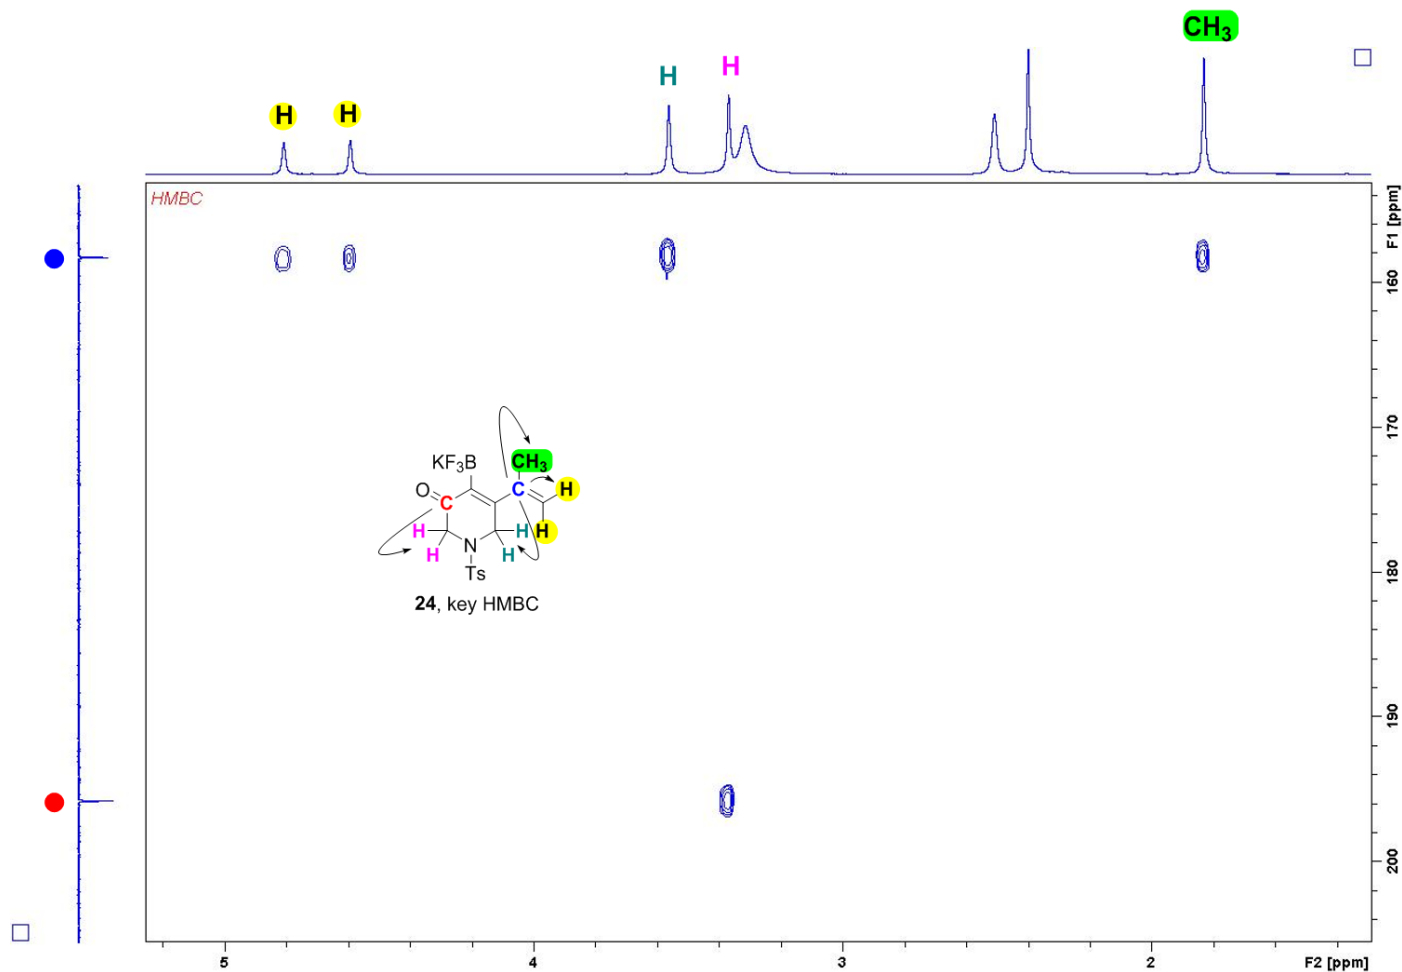



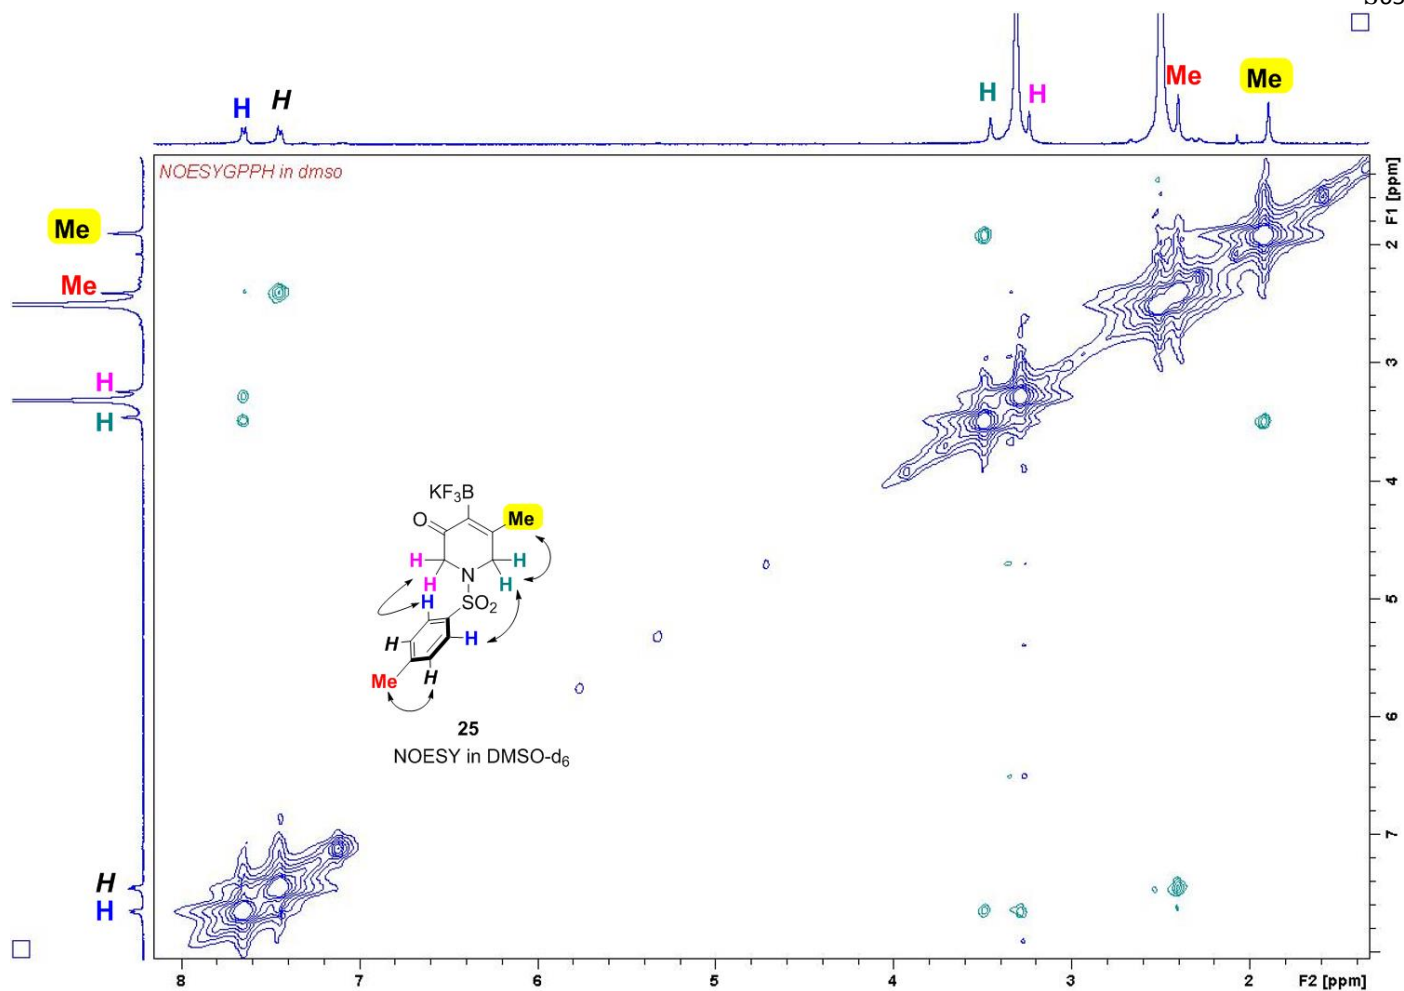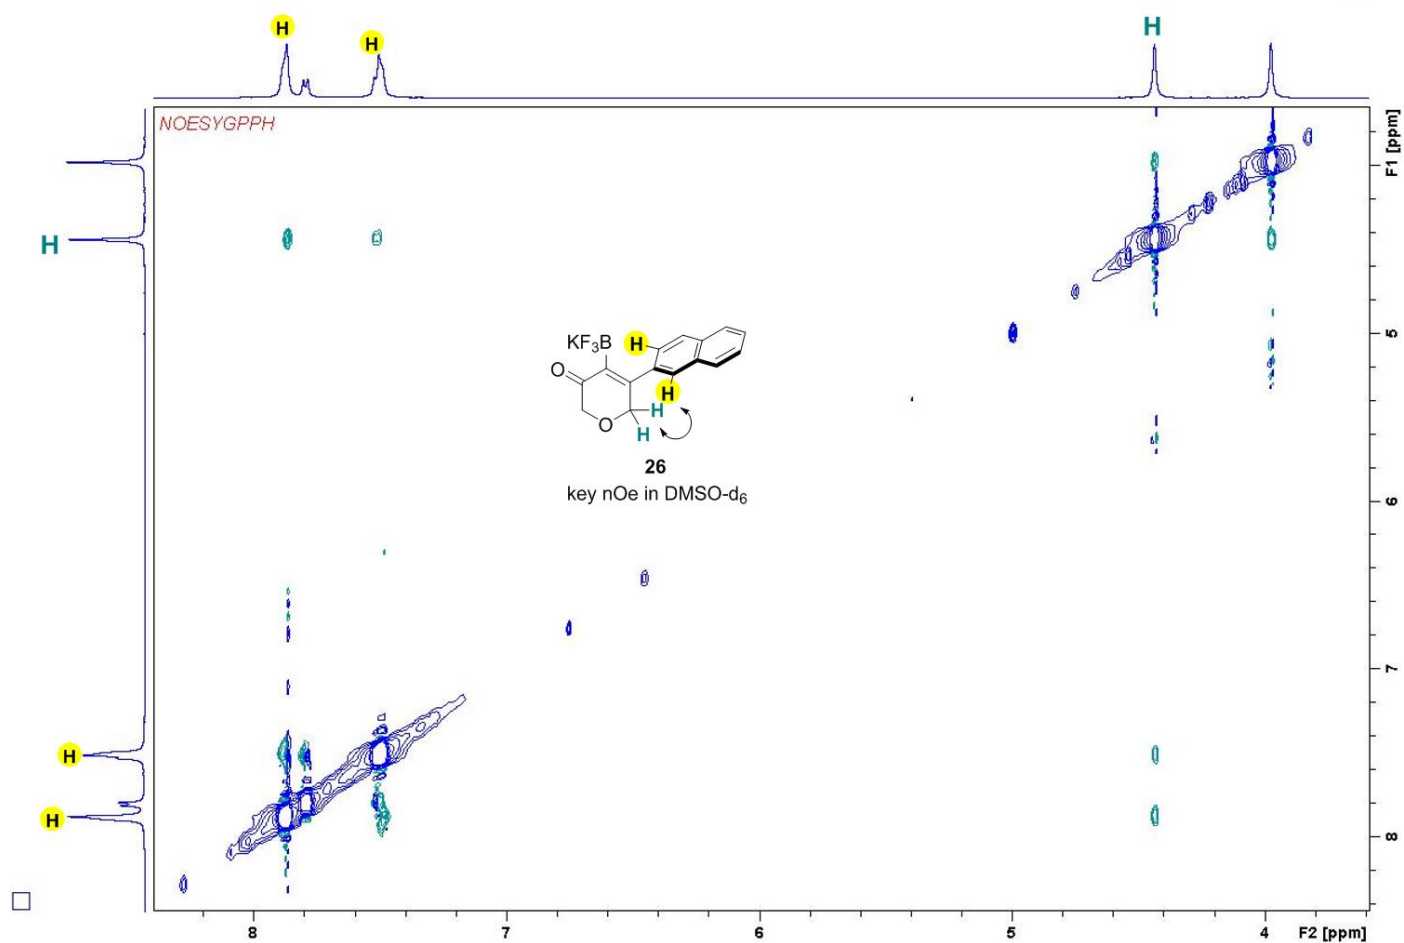

Supplement: c8cc09241a1.pdf [file c8cc09241a1.pdf]
